# Supplementary material for: Optimization of cancer immunotherapy through pyroptosis: A pyroptosis-related signature predicts survival benefit and potential synergy for immunotherapy in glioma
Source: Front Immunol. 2022 Aug 3;13:961933. doi: 10.3389/fimmu.2022.961933 (PMC9382657; doi:10.3389/fimmu.2022.961933)
Supplement: Supplementary file 6 [file Table_5.xlsx]

## Sheet: STable 5
Supplementary Table 5. Pyroptosis-related risk signature and related characteristics in TCGA cohort
Samples	PRRS	Group_Training_Internal Validation	Risk group	Cluster	Survial Status	OS (years)	Age	Gender	Grade	Histology	mRNAsi	mDNAsi	StromalScore	ImmuneScore	ESTIMATE score	IDH status	1p19q codeletion	MGMT promoter status	FPI	Temozolomide	CD8+ T Cell (EPIC)	CD8+ T Cell (TIMER)	CD8+ T Cell (CIBERSORT)	CD8+ T Cell (quanTIseq)	CD8+ T Cell (MCP-counter)	CD8+ T Cell (xCell)
TCGA-02-0047-01	2.94953	Internal Validation	High	Cluster1	1	1.2274	78	male	IV	glioblastoma	0.327028	N/A	185.433	872.224	1057.66	IDH1 wildtype	1p19q non-codel	Unmethylated	-0.691336	5.69782	0.0236836	0.25709	0.00894077	0	1.03528	0
TCGA-02-0055-01	5.55965	Internal Validation	High	Cluster1	1	0.208219	62	female	IV	glioblastoma	0.244642	N/A	1248.97	1647.7	2896.67	IDH1 wildtype	1p19q non-codel	Unmethylated	-0.604904	5.25091	0.000172112	0.340733	0.0486662	0.000599019	1.44035	7.63248e-19
TCGA-02-2483-01	2.34183	Internal Validation	High	Cluster2	0	1.27671	43	male	IV	glioblastoma	0.812766	N/A	-270.429	608.778	338.349	IDH1 mutant	1p19q non-codel	Methylated	-0.596453	5.30043	0.009884	0.278827	0.0261914	0	0.36285	0
TCGA-02-2485-01	2.64415	Internal Validation	High	Cluster1	0	1.28767	53	male	IV	glioblastoma	0.654421	N/A	-583.629	-1.91471	-585.544	IDH1 wildtype	1p19q non-codel	Unmethylated	-0.637307	5.49885	0.0139805	0.314623	0.0361865	0	1.18129	0
TCGA-02-2486-01	4.13789	Internal Validation	High	Cluster1	1	1.69315	64	male	IV	glioblastoma	0.410776	N/A	253.142	1919.22	2172.36	IDH1 wildtype	1p19q non-codel	Unmethylated	-0.559245	5.65551	1.13231e-05	0.246074	0.0602886	0.0081715	4.0323	0
TCGA-06-0125-01	2.30884	Internal Validation	High	Cluster1	1	3.96712	63	female	IV	glioblastoma	0.456973	0.375	-562.24	-176.43	-738.67	IDH1 wildtype	1p19q non-codel	Methylated	-0.681006	5.66814	0.0156024	0.264782	0.0195563	0	0.0686653	9.89288e-19
TCGA-06-0129-01	1.73198	Internal Validation	Low	Cluster1	1	2.80548	30	male	IV	glioblastoma	0.784121	N/A	-671.183	1017.13	345.951	IDH1 mutant	1p19q non-codel	Methylated	-0.738299	5.36585	0.00659432	0.216131	0.00493298	0	0.39771	0.00199458
TCGA-06-0130-01	5.18366	Internal Validation	High	Cluster1	1	1.07945	54	male	IV	glioblastoma	0.342856	N/A	1279.65	2468.84	3748.49	IDH1 wildtype	1p19q non-codel	Unmethylated	-0.584638	5.32721	0.0399861	0.438153	0.0818312	0.0442604	12.9703	0.0487156
TCGA-06-0132-01	2.9052	Internal Validation	High	Cluster1	1	2.11233	49	male	IV	glioblastoma	0.478402	N/A	609.736	1705.69	2315.42	IDH1 wildtype	1p19q non-codel	NA	-0.586134	5.81596	0.0407858	0.23366	0.0213661	0	1.41645	0
TCGA-06-0138-01	3.08676	Internal Validation	High	Cluster1	1	2.01918	43	male	IV	glioblastoma	0.450153	N/A	350.924	1224.92	1575.84	IDH1 wildtype	1p19q non-codel	NA	-0.656891	5.61055	0.0240708	0.329393	0.0110387	0	1.04487	0
TCGA-06-0139-01	4.47378	Internal Validation	High	Cluster1	1	0.991781	40	male	IV	glioblastoma	0.308872	N/A	1257.67	2662.93	3920.6	IDH1 wildtype	1p19q non-codel	Unmethylated	-0.486037	5.50234
TCGA-06-0141-01	3.74567	Internal Validation	High	Cluster1	1	0.857534	62	male	IV	glioblastoma	0.394401	N/A	543.11	1835.6	2378.71	IDH1 wildtype	1p19q non-codel	Unmethylated	-0.723704	5.87525	0.02807	0.325676	0.0363663	0.00101202	1.31601	0
TCGA-06-0156-01	3.62171	Internal Validation	High	Cluster1	1	0.487671	57	male	IV	glioblastoma	0.494222	N/A	-4.52697	1125.2	1120.67	IDH1 mutant	NA	NA	-0.64813	5.40931	0.0190631	0.147236	0.0701407	0.00505705	1.76076	4.84093e-18
TCGA-06-0157-01	2.70836	Internal Validation	High	Cluster1	1	0.265753	63	female	IV	glioblastoma	0.539026	N/A	-62.2241	650.281	588.056	IDH1 wildtype	1p19q non-codel	NA	-0.607322	5.71332	0.0179372	0.272817	0.0290768	0	1.13302	1.94618e-18
TCGA-06-0158-01	2.50459	Internal Validation	High	Cluster1	1	0.90137	73	male	IV	glioblastoma	0.349212	N/A	-227.226	793.345	566.119	IDH1 wildtype	1p19q non-codel	NA	-0.600511	5.79517	0.0188797	0.245083	0.00363916	0	0.527275	0
TCGA-06-0168-01	4.04692	Internal Validation	High	Cluster1	1	1.63836	59	female	IV	glioblastoma	0.580547	N/A	380.381	1252.81	1633.19	IDH1 wildtype	1p19q non-codel	NA	-0.611955	5.69626	1.9812e-07	0.19957	0	0	1.01151	0
TCGA-06-0174-01	2.31933	Internal Validation	High	Cluster2	1	0.268493	54	male	IV	glioblastoma	0.66028	N/A	-635.188	-117.419	-752.607	IDH1 wildtype	1p19q non-codel	NA	-0.532852	5.39531	0.0101405	0.269836	0.011794	0	0.216146	0
TCGA-06-0178-01	2.31163	Internal Validation	High	Cluster1	1	7.34521	38	male	IV	glioblastoma	0.774777	N/A	-225.759	893.082	667.323	IDH1 mutant	1p19q non-codel	NA	-0.624405	5.75838	0.010623	0.297441	0.0590084	0.00481171	0.870043	9.92729e-20
TCGA-06-0184-01	3.27638	Internal Validation	High	Cluster1	1	5.82466	63	male	IV	glioblastoma	0.456235	N/A	299.24	1506.88	1806.12	IDH1 wildtype	1p19q non-codel	NA	-0.540868	5.92906	0.00373208	0.243886	0	0	0.497813	3.32316e-18
TCGA-06-0187-01	3.47083	Internal Validation	High	Cluster1	1	2.26849	69	male	IV	glioblastoma	0.493903	N/A	-173.027	803.344	630.318	IDH1 wildtype	1p19q non-codel	NA	-0.652795	5.7371	0.00200203	0.214695	0	0	0.522163	0
TCGA-06-0190-01	3.79314	Internal Validation	High	Cluster1	1	0.868493	62	male	IV	glioblastoma	0.225366	0.273	787.682	1399.13	2186.81	IDH1 wildtype	1p19q non-codel	NA	-0.66347	5.59203	0.012151	0.309157	0.00968899	0	1.41072	0
TCGA-06-0210-01	4.39665	Internal Validation	High	Cluster1	1	0.616438	72	female	IV	glioblastoma	0.271808	0.403	-119.96	1288.16	1168.2	IDH1 wildtype	1p19q non-codel	NA	-0.639117	5.51114	0.0175635	0.271745	0.0366854	0	0.180304	0
TCGA-06-0211-01	3.56588	Internal Validation	High	Cluster1	1	0.986301	47	male	IV	glioblastoma	0.648317	0.308	106.256	1079.25	1185.51	IDH1 wildtype	1p19q non-codel	NA	-0.576257	5.56117	0.0129906	0.266269	0.021698	0	0.305957	2.22135e-18
TCGA-06-0219-01	3.03361	Internal Validation	High	Cluster1	1	0.060274	67	male	IV	glioblastoma	0.745167	N/A	-215.389	852.066	636.678	IDH1 wildtype	1p19q non-codel	NA	-0.83913	5.74153	0.00788891	0.300988	0.0463807	0.0019354	0.621842	0
TCGA-06-0238-01	2.30227	Internal Validation	High	Cluster2	1	1.10959	46	male	IV	glioblastoma	0.744603	N/A	-81.8284	1044.12	962.292	IDH1 wildtype	1p19q non-codel	NA	-0.620318	5.55847	0.0275627	0.290776	0.0123615	0.000780348	1.19035	2.74879e-18
TCGA-06-0644-01	3.85461	Internal Validation	High	Cluster1	1	1.05205	71	male	IV	glioblastoma	0.34403	N/A	790.238	1260.93	2051.17	IDH1 wildtype	1p19q non-codel	NA	-0.646067	5.31695	0.00136378	0.309315	0.0559671	0	1.35057	1.55775e-18
TCGA-06-0645-01	4.61755	Internal Validation	High	Cluster1	1	0.479452	55	female	IV	glioblastoma	0.335569	N/A	684.865	1837.08	2521.95	IDH1 wildtype	1p19q non-codel	NA	-0.473391	5.54657	0.00723938	0.191828	0.0247921	0	0.569708	0
TCGA-06-0646-01	3.59994	Internal Validation	High	Cluster1	1	0.479452	60	male	IV	glioblastoma	0.467281	N/A	67.2396	1124.22	1191.46	IDH1 wildtype	1p19q non-codel	NA	-0.637963	5.62372	0.00478276	0.222258	0	0	0.593741	1.14044e-19
TCGA-06-0649-01	2.84543	Internal Validation	High	Cluster1	1	0.175342	73	female	IV	NA	0.266873	N/A	432.142	1345.89	1778.04	NA	NA	NA	-0.474531	5.82196	0.0233901	0.2607	0.0678247	0.00203184	1.36356	2.98751e-19
TCGA-06-0686-01	2.5749	Internal Validation	High	Cluster2	1	1.18356	53	male	IV	glioblastoma	0.611324	N/A	-347.079	351.589	4.50994	IDH1 wildtype	1p19q non-codel	NA	-0.638787	5.55658	0.0133028	0.269355	0	0	0.145965	0
TCGA-06-0743-01	2.76181	Internal Validation	High	Cluster1	1	2.2	69	male	IV	glioblastoma	0.388435	N/A	-339.185	588.602	249.417	IDH1 wildtype	1p19q non-codel	NA	-0.575263	5.91954	0.0148233	0.261891	0.0565857	0	1.28977	1.72821e-18
TCGA-06-0744-01	1.43613	Internal Validation	Low	Cluster2	1	3.90685	66	male	IV	glioblastoma	0.558171	N/A	-558.364	188.543	-369.82	IDH1 wildtype	1p19q non-codel	NA	-0.622008	5.7343	0.0102293	0.259154	0.0552844	0.00446492	0.939949	0
TCGA-06-0745-01	2.59594	Internal Validation	High	Cluster1	1	0.654795	59	male	IV	glioblastoma	0.504583	N/A	-45.3934	888.866	843.473	IDH1 wildtype	1p19q non-codel	NA	-0.554249	5.5428	0.00431595	0.256441	0	0.000280792	0.410417	1.87785e-18
TCGA-06-0747-01	2.52391	Internal Validation	High	Cluster1	1	0.224658	53	male	IV	glioblastoma	0.394075	N/A	-1025.29	-135.156	-1160.45	IDH1 wildtype	1p19q non-codel	NA	-0.621397	5.77821	0.0177094	0.266202	0.000733994	0	3.25367	0
TCGA-06-0749-01	2.96335	Internal Validation	High	Cluster1	1	0.224658	50	male	IV	glioblastoma	0.547892	N/A	-282.02	1126.96	844.937	IDH1 wildtype	1p19q non-codel	NA	-0.674203	5.94143	0.000714998	0.245959	0.0233184	0	0.37029	0
TCGA-06-0750-01	3.21637	Internal Validation	High	Cluster1	1	0.0767123	43	male	IV	glioblastoma	0.304274	N/A	365.55	1031.25	1396.8	IDH1 wildtype	1p19q non-codel	NA	-0.629966	5.86778	0.00528746	0.260356	0	0	0.820866	1.13806e-18
TCGA-06-0878-01	3.3043	Internal Validation	High	Cluster1	0	0.59726	74	male	IV	glioblastoma	0.34161	N/A	95.4413	1045.89	1141.33	IDH1 wildtype	1p19q non-codel	Unmethylated	-0.652634	5.54539	0.00832034	0.241883	0	0	0.330763	1.18656e-20
TCGA-06-0882-01	3.61588	Internal Validation	High	Cluster1	1	1.73151	30	male	IV	glioblastoma	0.359733	N/A	120.408	1219.74	1340.15	IDH1 wildtype	1p19q non-codel	Unmethylated	-0.609124	5.81238	0.0309493	0.199799	0.0347491	0	0.587682	4.41682e-19
TCGA-06-1804-01	2.66426	Internal Validation	High	Cluster1	1	1.13425	81	female	IV	glioblastoma	0.409044	NA	-377.017	119.062	-257.955	IDH1 wildtype	1p19q non-codel	Methylated	-0.549861	5.79797	0.0191637	0.22603	0	0	0.373716	0
TCGA-06-2557-01	2.91061	Internal Validation	High	Cluster1	1	0.090411	76	male	IV	glioblastoma	0.542645	N/A	115.226	1718.85	1834.08	IDH1 wildtype	1p19q non-codel	Unmethylated	-0.606036	5.64837	0.0242028	0.28177	0.037048	0	2.87952	0
TCGA-06-2558-01	2.96184	Internal Validation	High	Cluster1	1	1.0411	75	female	IV	glioblastoma	0.618315	N/A	1.30465	474.899	476.204	IDH1 wildtype	1p19q non-codel	Unmethylated	-0.595364	5.43294	0.021458	0.279286	0.0113873	0	0.449467	6.47142e-19
TCGA-06-2559-01	2.50225	Internal Validation	High	Cluster1	1	0.410959	83	male	IV	glioblastoma	0.555485	N/A	-326.924	326.613	-0.310468	IDH1 wildtype	1p19q non-codel	Methylated	-0.739653	5.3088	0.0192884	0.283449	0.0264135	0	0.211811	3.39628e-18
TCGA-06-2561-01	3.32936	Internal Validation	High	Cluster1	1	1.47123	53	female	IV	glioblastoma	0.396886	N/A	-163.97	1194	1030.03	IDH1 wildtype	1p19q non-codel	Unmethylated	-0.703555	5.64826	0.012108	0.249428	0.0573797	0	1.8302	0.00826296
TCGA-06-2562-01	3.15062	Internal Validation	High	Cluster1	1	1.04658	81	male	IV	glioblastoma	0.323681	N/A	74.7583	780.243	855.002	IDH1 wildtype	1p19q non-codel	Unmethylated	-0.657041	5.45317	0.0116855	0.242118	0	0	0.243627	0
TCGA-06-2563-01	3.20197	Internal Validation	High	Cluster1	0	2.55342	72	female	IV	glioblastoma	0.562398	N/A	-325.807	349.571	23.7642	IDH1 wildtype	1p19q non-codel	Methylated	-0.689675	5.5395	0.0129654	0.263112	0.0727727	0	0.750931	2.38678e-21
TCGA-06-2564-01	2.72941	Internal Validation	High	Cluster1	0	0.49589	50	male	IV	glioblastoma	0.384724	N/A	-128.982	768.656	639.673	IDH1 wildtype	1p19q non-codel	Unmethylated	-0.512685	5.39004	0.0156881	0.233395	0.0469682	0	0.694791	0
TCGA-06-2565-01	3.06062	Internal Validation	High	Cluster1	1	1.3863	59	male	IV	glioblastoma	0.402465	N/A	-623.597	200.49	-423.107	IDH1 wildtype	1p19q non-codel	Methylated	-0.50797	5.57742	0.0198662	0.289536	0	0	0.74022	0.0115387
TCGA-06-2567-01	5.67585	Internal Validation	High	Cluster1	1	0.364384	65	male	IV	glioblastoma	0.57846	N/A	32.8437	1127.55	1160.39	IDH1 wildtype	1p19q non-codel	Methylated	-0.551044	5.68313	0.018314	0.301932	0.0104578	0	0.973031	3.66108e-18
TCGA-06-2569-01	1.23955	Internal Validation	Low	Cluster1	0	0.0356164	24	female	IV	glioblastoma	0.272577	N/A	-24.5069	-986.245	-1010.75	IDH1 wildtype	1p19q non-codel	Unmethylated	-0.800295	5.22785	0.0157417	0.309538	0.0506557	0.00778273	0.141376	0
TCGA-06-2570-01	2.27065	Internal Validation	High	Cluster1	0	2.62466	21	female	IV	glioblastoma	0.563896	N/A	-225.477	870.06	644.583	IDH1 mutant	1p19q non-codel	Methylated	-0.727862	5.53788	0.0106927	0.196178	0.0173166	0	0.188163	0
TCGA-06-5408-01	3.18404	Training	High	Cluster1	1	0.978082	54	female	IV	glioblastoma	0.563475	0.368	-439.913	202.143	-237.77	IDH1 wildtype	1p19q non-codel	Unmethylated	-0.742154	5.61691	0.00855085	0.263137	0.0544128	0	0.140072	2.69568e-19
TCGA-06-5410-01	4.69128	Internal Validation	High	Cluster1	1	0.29589	72	female	IV	glioblastoma	0.367301	0.153	921.9	2441.43	3363.33	IDH1 wildtype	1p19q non-codel	Methylated	-0.500865	5.65051	0.0314616	0.210331	0.0198836	0	0.287314	0
TCGA-06-5411-01	2.47541	Internal Validation	High	Cluster1	1	0.69589	51	male	IV	glioblastoma	0.663773	0.42	-178.175	472.932	294.758	IDH1 wildtype	1p19q non-codel	Unmethylated	-0.798178	5.60357	0.0252088	0.264103	0.0772676	0.00425399	0.927619	0
TCGA-06-5412-01	5.52895	Training	High	Cluster1	1	0.378082	78	female	IV	glioblastoma	0.403522	0.182	772.487	1848.42	2620.91	IDH1 wildtype	1p19q non-codel	Methylated	-0.537948	5.52578	0.0127381	0.269975	0.0285653	0	0.49052	0
TCGA-06-5413-01	3.20319	Training	High	Cluster1	0	0.734247	67	male	IV	glioblastoma	0.624016	0.265	455.223	1083.85	1539.07	IDH1 wildtype	1p19q non-codel	Unmethylated	-0.613725	5.43985	0.0209105	0.320581	0.0367576	0.00335661	1.80178	0
TCGA-06-5414-01	3.50236	Internal Validation	High	Cluster1	0	0.747945	61	male	IV	glioblastoma	0.470278	0.284	-199.22	1156.55	957.326	IDH1 wildtype	1p19q non-codel	Unmethylated	-0.614508	5.56725	0.00792342	0.244592	0.00984192	0	0.388141	2.11094e-19
TCGA-06-5416-01	2.76483	Internal Validation	High	Cluster2	0	0.558904	23	female	IV	glioblastoma	0.740201	1	-1034.34	-523.074	-1557.41	NA	1p19q non-codel	Unmethylated	-0.795605	5.43547	0.011915	0.304976	0.0708987	0.00185574	1.39479	3.09624e-18
TCGA-06-5417-01	2.08959	Internal Validation	Low	Cluster2	0	0.424658	45	female	IV	glioblastoma	0.748587	0.351	-809.261	-190.205	-999.465	IDH1 mutant	NA	Methylated	-0.713148	5.29809	0.0235563	0.271805	0.0338341	2.64284e-05	0.153898	0
TCGA-06-5418-01	3.05475	Internal Validation	High	Cluster1	1	0.227397	75	female	IV	glioblastoma	0.40784	0.294	-206.906	927.677	720.771	IDH1 wildtype	1p19q non-codel	Unmethylated	-0.70024	5.43029	0.0151339	0.252322	0	0	0.342683	2.28877e-19
TCGA-06-5856-01	2.9878	Training	High	Cluster1	1	0.312329	58	male	IV	glioblastoma	0.61371	0.36	-42.3674	570.139	527.771	IDH1 wildtype	1p19q non-codel	Unmethylated	-0.615045	5.59692	0.0110321	0.264061	0.0360132	0	0.452827	1.12126e-18
TCGA-06-5858-01	2.63693	Training	High	Cluster1	0	0.512329	45	female	IV	glioblastoma	0.502109	0.394	14.8367	673.439	688.276	IDH1 wildtype	1p19q non-codel	Unmethylated	-0.637035	5.4582	0.0118723	0.258591	0	0	0.141366	2.44425e-18
TCGA-06-5859-01	3.39153	Internal Validation	High	Cluster1	0	0.380822	63	male	IV	glioblastoma	0.610949	0.349	-207.762	927.855	720.093	IDH1 wildtype	1p19q non-codel	Unmethylated	-0.658478	5.53059	0.0193471	0.320554	0.0502604	0	1.33499	5.31867e-20
TCGA-08-0386-01	3.02454	Internal Validation	High	Cluster1	1	1.50137	74	male	IV	glioblastoma	0.581406	N/A	-550.805	-273.472	-824.276	IDH1 wildtype	1p19q non-codel	NA	-0.665619	5.64689	0.015638	0.263157	0	0	0.0382146	2.62004e-18
TCGA-12-0616-01	2.38221	Internal Validation	High	Cluster2	1	1.2274	36	female	IV	glioblastoma	0.678936	N/A	-435.967	640.75	204.783	IDH1 wildtype	1p19q non-codel	NA	-0.768777	5.52382	0.014688	0.287947	0.150566	0.00586523	2.20638	0
TCGA-12-0618-01	1.51188	Internal Validation	Low	Cluster2	1	1.08219	49	male	IV	glioblastoma	0.586428	N/A	-930.498	-418.376	-1348.87	IDH1 wildtype	1p19q non-codel	NA	-0.696832	5.53898	0.0206998	0.277482	0.031803	0	0.123533	1.43023e-18
TCGA-12-0619-01	3.46888	Internal Validation	High	Cluster1	1	2.90959	60	male	IV	glioblastoma	0.421822	N/A	33.3429	1246.39	1279.74	IDH1 wildtype	1p19q non-codel	NA	-0.483789	5.53498	0.0057138	0.25447	0.0511658	0	0.973973	0
TCGA-12-0821-01	2.70707	Internal Validation	High	Cluster1	1	0.884932	62	male	IV	glioblastoma	0.539025	N/A	-450.174	-103.93	-554.104	IDH1 wildtype	1p19q non-codel	Unmethylated	-0.613419	5.54136	0.0155233	0.283462	0.0354741	0	0.47567	1.02757e-18
TCGA-12-1597-01	2.17966	Internal Validation	High	Cluster2	1	1.84932	62	female	IV	NA	0.656602	N/A	-498.57	345.503	-153.067	NA	NA	NA	-0.687889	5.71053	0.0119148	0.271926	0	0	0.329576	0
TCGA-12-3650-01	2.83382	Internal Validation	High	Cluster1	1	0.912329	46	male	IV	glioblastoma	0.718369	N/A	-629.049	360.857	-268.192	IDH1 wildtype	1p19q non-codel	Unmethylated	-0.650249	5.61253	0.00950062	0.271994	0.0976087	0.00186994	1.23585	1.37683e-18
TCGA-12-3652-01	3.20523	Internal Validation	High	Cluster1	1	2.90959	60	male	IV	glioblastoma	0.632569	N/A	-957.375	20.2219	-937.154	IDH1 wildtype	1p19q non-codel	Unmethylated	-0.745975	5.78946	0.00535052	0.273983	0.0499572	0	0.48741	0
TCGA-12-3653-01	2.96771	Internal Validation	High	Cluster1	1	1.21096	34	female	IV	glioblastoma	0.684478	N/A	-616.692	623.7	7.00764	IDH1 wildtype	1p19q non-codel	Unmethylated	-0.682395	5.69435	0.00271274	0.23143	0.0554585	0	0.380889	3.17369e-20
TCGA-12-5295-01	2.68475	Training	High	Cluster1	1	1.24384	60	female	IV	glioblastoma	0.699345	0.352	-236.474	1177.77	941.294	IDH1 wildtype	1p19q non-codel	Methylated	-0.704835	5.63543	0.0173516	0.301054	0.0451783	0.00197102	2.22149	1.8779e-18
TCGA-12-5299-01	3.58491	Training	High	Cluster1	1	0.268493	56	female	IV	glioblastoma	0.538284	0.246	-219.047	622.094	403.046	IDH1 wildtype	1p19q non-codel	Unmethylated	-0.525833	5.57831	0.00268693	0.244733	0.0235657	0	0.0566342	0
TCGA-14-0781-01	3.71374	Internal Validation	High	Cluster1	1	0.0794521	49	male	IV	NA	0.112514	0.195	483.434	1172.61	1656.05	NA	NA	NA	-0.49891	5.68942	0.00866446	0.258993	0	0	0.103777	0
TCGA-14-0787-01	3.35997	Internal Validation	High	Cluster1	1	0.186301	69	male	IV	glioblastoma	0.574103	N/A	-529.737	772.085	242.348	IDH1 wildtype	1p19q non-codel	Methylated	-0.651192	5.50645	0.0119439	0.251777	0.039978	0	0.401248	5.66378e-19
TCGA-14-0789-01	4.39998	Internal Validation	High	Cluster1	1	0.936986	54	male	IV	glioblastoma	0.21213	N/A	243.428	1488.78	1732.21	IDH1 wildtype	1p19q non-codel	Methylated	-0.405917	5.60572	1.86485e-05	0.198728	0.0294789	0	0.22107	0
TCGA-14-0790-01	2.57539	Internal Validation	High	Cluster1	1	1.14795	64	female	IV	NA	0.61075	N/A	-803.073	-472.777	-1275.85	NA	NA	NA	-0.557892	5.73316	0.0127296	0.276298	0.0187301	0	0.349797	0
TCGA-14-0817-01	3.02923	Internal Validation	High	Cluster1	1	0.449315	69	female	IV	glioblastoma	0.652457	N/A	259.602	1580.68	1840.28	IDH1 wildtype	1p19q non-codel	Unmethylated	-0.615476	5.75211	0.0119518	0.251147	0.00142918	4.12242e-06	1.19072	0
TCGA-14-0871-01	1.78772	Internal Validation	Low	Cluster1	1	2.41096	74	female	IV	glioblastoma	0.684466	N/A	-426.82	-650.088	-1076.91	IDH1 wildtype	1p19q non-codel	Unmethylated	-0.635451	5.44334
TCGA-14-1034-01	3.36385	Internal Validation	High	Cluster1	1	1.32877	60	female	IV	glioblastoma	0.52114	N/A	-60.6768	1090.02	1029.34	IDH1 wildtype	1p19q non-codel	Methylated	-0.410781	5.66363	0.00760503	0.222049	0.0347233	0	0.474351	0
TCGA-14-1823-01	3.87717	Internal Validation	High	Cluster1	1	1.48767	58	female	IV	glioblastoma	0.557857	N/A	91.874	1455.96	1547.84	IDH1 wildtype	1p19q non-codel	Methylated	-0.591028	5.63833	0.0172798	0.282658	0	0	0.345204	1.12962e-18
TCGA-14-1825-01	1.88365	Internal Validation	Low	Cluster2	1	0.635616	70	male	IV	glioblastoma	0.782188	N/A	-781.439	-84.5671	-866.006	IDH1 wildtype	1p19q non-codel	Unmethylated	-0.742699	5.53629	0.021053	0.272	0.0325078	0	0.208493	7.61268e-18
TCGA-14-1829-01	3.1818	Internal Validation	High	Cluster1	0	0.59726	57	male	IV	glioblastoma	0.662824	N/A	297.993	1202.49	1500.48	IDH1 wildtype	1p19q non-codel	Unmethylated	-0.634308	5.62754	0.0324226	0.311826	0.0271573	0.00621414	4.58591	0
TCGA-14-2554-01	3.90631	Internal Validation	High	Cluster1	1	1.45753	52	female	IV	glioblastoma	0.527873	N/A	-23.6564	1073.25	1049.59	IDH1 wildtype	1p19q non-codel	Unmethylated	-0.540853	5.55238	0.0130027	0.238891	0.0439202	0	0.727036	0
TCGA-15-0742-01	2.09192	Internal Validation	High	Cluster2	1	1.14795	65	male	IV	glioblastoma	0.621271	N/A	-921.165	-141.024	-1062.19	IDH1 wildtype	1p19q non-codel	NA	-0.69156	5.77915	0.00460602	0.264976	0.0712432	0	0.255354	0
TCGA-15-1444-01	1.72906	Internal Validation	Low	Cluster1	1	4.21096	21	male	IV	glioblastoma	0.51594	0.216	-65.2258	889.016	823.79	IDH1 mutant	1p19q non-codel	Methylated	-0.636738	5.66008	0.013271	0.240335	0	0	0.241648	2.18795e-18
TCGA-16-0846-01	3.76018	Internal Validation	High	Cluster1	1	0.326027	85	male	IV	glioblastoma	0.646944	N/A	-152.617	1141.74	989.121	IDH1 wildtype	1p19q non-codel	Methylated	-0.691689	5.85315	0.00856704	0.258335	0.0406976	0	3.55788	1.19693e-19
TCGA-16-1045-01	3.2077	Internal Validation	High	Cluster1	1	2.41918	49	female	IV	NA	0.269932	N/A	702.852	1693.11	2395.96	NA	NA	NA	-0.63943	5.75422	0.0262425	0.282355	0.0235568	0	0.771095	0
TCGA-19-1390-01	1.30227	Internal Validation	Low	Cluster2	1	2.11507	63	female	IV	glioblastoma	0.688521	N/A	-1139.23	-311.129	-1450.36	IDH1 wildtype	1p19q non-codel	Methylated	-0.63642	5.28135	0.0194341	0.250883	0.03853	0	0.0702788	9.7757e-19
TCGA-19-1787-01	2.79467	Internal Validation	High	Cluster1	1	1.05479	48	male	IV	NA	0.754973	N/A	-219.341	785.672	566.331	NA	NA	NA	-0.768896	5.57209	0.00392096	0.293938	0.0521343	2.83106e-05	0.845982	0
TCGA-19-2619-01	2.98443	Internal Validation	High	Cluster1	0	0.805479	55	female	IV	glioblastoma	0.444479	N/A	-472.184	-107.047	-579.23	IDH1 wildtype	1p19q non-codel	Methylated	-0.743541	5.67569	0.00825443	0.281133	0.0148352	0	0.339336	0
TCGA-19-2620-01	2.39236	Internal Validation	High	Cluster1	1	0.405479	70	male	IV	glioblastoma	0.291099	N/A	-322.798	321.253	-1.54565	IDH1 wildtype	1p19q non-codel	Methylated	-0.59283	5.89311	0.01738	0.25761	0.0425106	0	2.12537	0
TCGA-19-2624-01	0.90092	Internal Validation	Low	Cluster2	1	0.0136986	51	male	IV	glioblastoma	0.655516	N/A	-1301.16	-793.211	-2094.37	IDH1 wildtype	1p19q non-codel	Unmethylated	-0.827219	5.47456	0.0114084	0.273456	0.0286339	0	0.269829	7.60976e-19
TCGA-19-2625-01	3.07556	Internal Validation	High	Cluster1	1	0.339726	76	female	IV	glioblastoma	0.394828	N/A	-521.064	243.342	-277.722	IDH1 wildtype	1p19q non-codel	Unmethylated	-0.67124	5.97551	0.00218978	0.252892	0.0280727	0	0.15726	0
TCGA-19-2629-01	2.44183	Internal Validation	High	Cluster1	1	2.01918	60	male	IV	glioblastoma	0.64378	N/A	-211.184	855.36	644.176	IDH1 mutant	1p19q non-codel	Unmethylated	-0.701656	5.70942	0.00510102	0.212797	0.00659553	0	0.501719	0
TCGA-19-4065-01	3.33725	Internal Validation	High	Cluster1	0	0.586301	36	male	IV	glioblastoma	0.421467	0.354	336.883	1561.07	1897.95	NA	1p19q non-codel	Unmethylated	-0.633611	5.50143	0.0109177	0.330577	0.00079329	0	1.72761	9.56662e-19
TCGA-19-5960-01	1.28147	Internal Validation	Low	Cluster2	1	1.24658	56	male	IV	glioblastoma	0.761688	0.24	-1133.57	-752.396	-1885.96	IDH1 wildtype	1p19q non-codel	Unmethylated	-0.520371	5.59221	0.0134673	0.29996	0	0	0.117048	0
TCGA-26-1442-01	1.47279	Internal Validation	Low	Cluster2	0	2.61096	43	male	IV	glioblastoma	0.470658	0.184	-664.881	15.3053	-649.576	IDH1 mutant	1p19q non-codel	Methylated	-0.704224	5.71972	0.01554	0.230296	0.0112547	0	0.127147	0.00505935
TCGA-26-5132-01	3.12324	Internal Validation	High	Cluster1	0	0.783562	74	male	IV	glioblastoma	0.486725	0.338	-356.144	431.071	74.9274	IDH1 wildtype	1p19q non-codel	Methylated	-0.518788	5.66728	0.0114631	0.299242	0.0381033	0	1.1811	9.18128e-18
TCGA-26-5133-01	2.75998	Training	High	Cluster2	0	1.23836	59	male	IV	glioblastoma	0.719069	0.404	-736.129	-377.114	-1113.24	IDH1 wildtype	1p19q non-codel	Unmethylated	-0.607213	5.58534	0.0122603	0.275389	0	0.00839863	0.285821	1.1048e-19
TCGA-26-5134-01	1.63056	Training	Low	Cluster2	0	0.457534	74	male	IV	glioblastoma	0.619453	0.385	-564.538	113.353	-451.185	IDH1 wildtype	1p19q non-codel	Unmethylated	-0.745138	5.52113	0.0104695	0.26787	0.0513038	0	0.548075	0
TCGA-26-5135-01	2.36441	Training	High	Cluster1	1	0.739726	72	female	IV	glioblastoma	0.474606	0.397	19.0018	746.288	765.289	IDH1 wildtype	1p19q non-codel	Methylated	-0.576192	5.57198	2.47343e-06	0.218108	0.0325054	0	0.265467	1.09176e-18
TCGA-26-5136-01	3.722	Internal Validation	High	Cluster1	1	1.58082	78	female	IV	NA	0.567407	0.275	140.783	1144.28	1285.06	NA	NA	NA	-0.709996	5.5318	0.0104789	0.279041	0.0167448	0	1.22809	0
TCGA-26-5139-01	3.29021	Training	High	Cluster1	0	0.131507	65	female	IV	glioblastoma	0.382231	0.336	-164.634	578.526	413.892	IDH1 wildtype	1p19q non-codel	Unmethylated	-0.586312	5.66869	0.0174834	0.245999	0.0405764	0	1.30805	6.12334e-19
TCGA-27-1830-01	3.3895	Internal Validation	High	Cluster1	1	0.421918	57	male	IV	glioblastoma	0.27594	N/A	300.156	928.599	1228.75	IDH1 wildtype	1p19q non-codel	Unmethylated	-0.524584	5.62748	0.015686	0.274494	0.0285907	0	1.23267	0
TCGA-27-1831-01	3.89637	Internal Validation	High	Cluster1	1	1.38356	66	male	IV	glioblastoma	0.666611	N/A	280.54	1196.93	1477.47	IDH1 wildtype	1p19q non-codel	Unmethylated	-0.587614	5.55311	0.0113392	0.30426	0.0289754	0.00421705	1.3506	0
TCGA-27-1832-01	4.52177	Internal Validation	High	Cluster1	1	0.821918	59	female	IV	glioblastoma	0.401012	N/A	213.425	1398.99	1612.41	IDH1 wildtype	1p19q non-codel	Unmethylated	-0.62503	5.94794	0.00536136	0.279384	0.073931	0	2.06034	5.42676e-19
TCGA-27-1834-01	3.05673	Internal Validation	High	Cluster1	1	3.37808	56	male	IV	glioblastoma	0.395908	N/A	-83.3995	1091.48	1008.08	IDH1 wildtype	1p19q non-codel	Methylated	-0.674326	5.74037	0.0177345	0.251792	0.0273062	0	0.949931	1.32981e-18
TCGA-27-1835-01	2.22014	Internal Validation	High	Cluster1	1	1.77534	53	female	IV	glioblastoma	0.607087	N/A	-816.208	-470.602	-1286.81	IDH1 wildtype	1p19q non-codel	Methylated	-0.652831	5.55036	0.0104391	0.273364	0	0	0.424224	6.36428e-18
TCGA-27-1837-01	2.38988	Internal Validation	High	Cluster1	1	1.16986	36	male	IV	glioblastoma	0.56778	N/A	-342.916	614.833	271.917	IDH1 wildtype	1p19q non-codel	Methylated	-0.643648	5.61397	0.0103502	0.227791	0	0	0.252139	0
TCGA-27-2519-01	3.95989	Internal Validation	High	Cluster1	1	1.50685	48	male	IV	glioblastoma	0.58062	N/A	167.326	1327.72	1495.05	IDH1 wildtype	1p19q non-codel	Unmethylated	-0.605816	5.52763	0.00940744	0.257429	0.0409462	0	0.600536	0
TCGA-27-2521-01	2.42465	Internal Validation	High	Cluster2	1	1.39726	34	male	IV	glioblastoma	0.71097	N/A	-810.519	-331.852	-1142.37	IDH1 mutant	1p19q non-codel	Methylated	-0.715876	5.58577	0.0147764	0.260859	0	0	0.0584577	1.99206e-18
TCGA-27-2523-01	2.86211	Internal Validation	High	Cluster1	1	1.33973	63	male	IV	glioblastoma	0.70415	N/A	-866.936	-34.8775	-901.813	IDH1 wildtype	1p19q non-codel	Methylated	-0.654108	5.41531	0.00948336	0.249442	0	0.00178066	0.249953	0
TCGA-27-2524-01	3.70476	Internal Validation	High	Cluster1	1	0.632877	56	male	IV	glioblastoma	0.575169	N/A	22.0662	902.151	924.218	IDH1 wildtype	1p19q non-codel	Unmethylated	-0.629513	5.69124	1.43302e-06	0.241397	0.0231576	0	0.481513	1.37238e-18
TCGA-27-2526-01	4.04849	Internal Validation	High	Cluster1	1	0.238356	79	female	IV	glioblastoma	0.723226	N/A	-557.204	982.413	425.209	IDH1 wildtype	1p19q non-codel	Unmethylated	-0.610081	5.77469	0.0076126	0.329883	0.103402	0	4.66731	0.011741
TCGA-27-2528-01	2.67642	Internal Validation	High	Cluster1	1	1.31507	62	male	IV	glioblastoma	0.494646	N/A	-156.062	-387.394	-543.457	IDH1 wildtype	1p19q non-codel	Methylated	-0.624793	5.63423	0.0116215	0.28167	0.0140356	0	0.194132	0
TCGA-28-1747-01	2.79196	Internal Validation	High	Cluster1	1	0.210959	44	male	IV	NA	0.665051	N/A	-401.197	1114.99	713.79	NA	NA	NA	-0.701107	5.74618	0.00987799	0.224766	0.0165087	0	1.20492	1.72852e-18
TCGA-28-1753-01	2.28152	Internal Validation	High	Cluster1	0	0.10137	53	male	IV	glioblastoma	0.409071	N/A	602.134	1365.11	1967.24	IDH1 wildtype	1p19q non-codel	Unmethylated	-0.568511	5.55385	0.00935617	0.4149	0.0152384	0	0.897517	2.44786e-19
TCGA-28-2499-01	3.25294	Internal Validation	High	Cluster1	0	0.260274	59	male	IV	glioblastoma	0.471265	N/A	-467.429	482.771	15.342	IDH1 wildtype	NA	Unmethylated	-0.71182	5.94787	0.01119	0.265979	0	0	0.651944	1.20774e-18
TCGA-28-2509-01	3.38189	Internal Validation	High	Cluster1	0	0.39726	77	female	IV	glioblastoma	0.53622	N/A	-564.197	629.609	65.4123	IDH1 wildtype	1p19q non-codel	Methylated	-0.67988	5.73639	0.00428018	0.293199	0.0492021	0	0.427095	0
TCGA-28-2513-01	4.07202	Internal Validation	High	Cluster1	0	0.608219	69	female	IV	glioblastoma	0.256862	N/A	621.628	1570.47	2192.1	IDH1 wildtype	1p19q non-codel	Unmethylated	-0.431526	5.82336	0.0129812	0.249589	0.0303052	0	0.602209	0
TCGA-28-2514-01	3.66052	Internal Validation	High	Cluster1	0	0.438356	45	male	IV	glioblastoma	0.493118	N/A	-617.959	7.61085	-610.348	IDH1 wildtype	1p19q non-codel	Unmethylated	-0.709606	5.71621	0.0250397	0.264942	0.0362028	0.0073657	8.87982	1.52784e-18
TCGA-28-5204-01	3.05161	Internal Validation	High	Cluster1	1	1.24384	72	male	IV	glioblastoma	0.690776	0.29	-459.333	436.093	-23.24	IDH1 wildtype	1p19q non-codel	Unmethylated	-0.594227	5.45978	0.00645288	0.269214	0.0402382	0	0.286637	0
TCGA-28-5207-01	2.49423	Training	High	Cluster1	1	0.939726	71	male	IV	glioblastoma	0.532739	0.349	121.855	371.324	493.179	IDH1 wildtype	1p19q non-codel	Unmethylated	-0.722277	5.62394	0.024987	0.291435	0.0277799	0	1.3209	0
TCGA-28-5208-01	3.44822	Internal Validation	High	Cluster1	1	1.49041	52	male	IV	glioblastoma	0.618385	0.365	-1.74811	617.187	615.439	IDH1 wildtype	1p19q non-codel	Methylated	-0.629728	5.4974	0.0150645	0.274746	0.0397679	0	0.242497	3.41831e-18
TCGA-28-5209-01	3.26349	Training	High	Cluster1	0	1.21096	66	female	IV	glioblastoma	0.5659	0.312	-508.173	-57.3703	-565.543	IDH1 wildtype	1p19q non-codel	Methylated	-0.564045	5.55502	0.00770433	0.291759	0	0	0.124049	0
TCGA-28-5213-01	3.12499	Training	High	Cluster1	0	2.60548	72	male	IV	glioblastoma	0.429298	0.22	787.787	1956.29	2744.07	IDH1 wildtype	1p19q non-codel	Unmethylated	-0.538952	5.70684	0.0275868	0.284238	0.0364085	0	3.05211	0
TCGA-28-5215-01	3.03719	Internal Validation	High	Cluster1	1	0.917808	62	female	IV	glioblastoma	0.508796	0.442	466.427	836.617	1303.04	IDH1 wildtype	1p19q non-codel	Methylated	-0.55752	5.53344	0.0109289	0.287078	0.0282828	0	1.75752	0
TCGA-28-5216-01	2.76767	Training	High	Cluster1	0	1.13699	52	male	IV	glioblastoma	0.478371	0.506	-43.2045	512.562	469.357	IDH1 wildtype	1p19q non-codel	Unmethylated	-0.702122	5.60068	0.0108276	0.263229	0.0698505	0	0.675655	4.7035e-18
TCGA-28-5218-01	4.69409	Internal Validation	High	Cluster1	1	0.430137	63	male	IV	glioblastoma	0.206414	0.202	1198.28	1690.2	2888.49	IDH1 wildtype	1p19q non-codel	Unmethylated	-0.540028	5.21764	8.69716e-07	0.471896	0.156537	0.0250307	15.4073	0.0643507
TCGA-28-5220-01	2.39641	Training	High	Cluster1	1	1.06301	67	male	IV	glioblastoma	0.698045	0.408	-386.109	727.593	341.484	IDH1 wildtype	1p19q non-codel	Unmethylated	-0.771989	5.91513	0.0243607	0.264962	0	0	1.43006	0.001534
TCGA-32-1970-01	2.87672	Internal Validation	High	Cluster1	1	1.28219	59	male	IV	glioblastoma	0.614094	N/A	-525.982	91.1529	-434.829	IDH1 wildtype	1p19q non-codel	Unmethylated	-0.665777	5.81784	0.0155324	0.23622	0.0122616	0	0.771853	6.75521e-18
TCGA-32-1980-01	3.99714	Training	High	Cluster1	1	0.0986301	72	male	IV	glioblastoma	0.462909	0.197	424.507	1296.66	1721.16	IDH1 wildtype	1p19q non-codel	Unmethylated	-0.585333	5.86457	0.0443049	0.266557	0.0165916	0	0.931243	9.892e-19
TCGA-32-1982-01	3.41492	Internal Validation	High	Cluster1	1	0.389041	76	female	IV	glioblastoma	0.34844	N/A	351.675	1328.77	1680.44	IDH1 wildtype	1p19q non-codel	Methylated	-0.53278	5.70281	0.0172975	0.327546	0.0388278	0.00480869	3.3977	3.88479e-19
TCGA-32-2615-01	3.10699	Internal Validation	High	Cluster1	1	1.32877	62	male	IV	glioblastoma	0.32686	N/A	76.8546	961.38	1038.23	IDH1 wildtype	1p19q non-codel	Unmethylated	-0.712912	5.75496	0.00598309	0.263145	0.020113	0	1.08634	1.09023e-18
TCGA-32-2616-01	3.35319	Internal Validation	High	Cluster1	1	0.613699	48	female	IV	glioblastoma	0.621173	N/A	-453.759	537.84	84.0813	NA	1p19q non-codel	Methylated	-0.689156	5.66026	0.00911878	0.305594	0.0473844	0	1.12767	3.90859e-18
TCGA-32-2632-01	3.99728	Internal Validation	High	Cluster1	1	0.736986	80	male	IV	glioblastoma	0.550123	N/A	181.027	1386.38	1567.4	IDH1 wildtype	1p19q non-codel	Unmethylated	-0.631631	5.6519	0.0170365	0.248134	0.0735417	0	3.22833	0
TCGA-32-2634-01	2.06078	Internal Validation	Low	Cluster2	0	1.89863	82	male	IV	glioblastoma	0.69295	N/A	-618.277	-255.422	-873.699	IDH1 wildtype	1p19q non-codel	Methylated	-0.648056	5.45527	0.0190515	0.283666	0.0479864	0.00376513	0.93666	0
TCGA-32-2638-01	3.50339	Internal Validation	High	Cluster1	1	2.09863	67	male	IV	glioblastoma	0.296324	N/A	279.882	1057.97	1337.85	IDH1 wildtype	1p19q non-codel	Methylated	-0.585368	5.68269	0.0143658	0.230262	0	0	0.543653	1.1112e-20
TCGA-32-4213-01	3.86192	Internal Validation	High	Cluster1	0	1.65479	47	female	IV	glioblastoma	0.447447	N/A	594.208	1471.78	2065.99	IDH1 wildtype	1p19q non-codel	Methylated	-0.549251	5.63543	0.00935178	0.283768	0.0438995	0	1.13755	0
TCGA-32-5222-01	3.37569	Training	High	Cluster1	1	1.60274	66	male	IV	glioblastoma	0.646548	0.379	-63.0056	1158.29	1095.29	IDH1 wildtype	1p19q non-codel	Methylated	-0.720484	5.47422	0.0123806	0.28118	0.00403922	0	0.312713	4.4939e-19
TCGA-41-2571-01	1.7641	Internal Validation	Low	Cluster2	1	0.0712329	89	male	IV	glioblastoma	0.58071	N/A	-809.211	20.5473	-788.663	IDH1 wildtype	1p19q non-codel	Unmethylated	-0.562243	5.83602	0.010199	0.260797	0	0.00349022	0.0747626	0
TCGA-41-2572-01	3.36434	Internal Validation	High	Cluster1	1	1.11233	67	male	IV	glioblastoma	0.468462	N/A	-246.155	588.665	342.51	IDH1 wildtype	1p19q non-codel	Unmethylated	-0.696951	5.83656	0.00170106	0.229423	0.0340368	0	0.560234	0
TCGA-41-3915-01	3.53783	Internal Validation	High	Cluster1	1	0.986301	48	male	IV	glioblastoma	0.267579	N/A	461.801	1203.33	1665.13	IDH1 wildtype	1p19q non-codel	Methylated	-0.491711	5.70793	0.0161736	0.270254	0.102375	0.00325578	2.3344	0
TCGA-41-4097-01	2.54781	Internal Validation	High	Cluster1	1	0.0164384	63	female	IV	glioblastoma	0.174544	N/A	478.394	1028.76	1507.15	IDH1 wildtype	1p19q non-codel	Unmethylated	-0.656885	5.92414	0.0167934	0.256781	0.0707316	0	1.46582	0
TCGA-41-5651-01	1.89368	Training	Low	Cluster2	1	1.26027	59	female	IV	glioblastoma	0.821975	0.301	-867.491	-576.823	-1444.31	IDH1 wildtype	1p19q non-codel	Methylated	-0.62399	5.53788	0.0153917	0.294895	0.0742908	0	0.455571	0
TCGA-76-4925-01	2.55787	Training	High	Cluster1	1	0.4	76	male	IV	glioblastoma	0.658187	0.338	-797.508	-317.015	-1114.52	IDH1 wildtype	1p19q non-codel	Methylated	-0.544515	5.42958	0.00660966	0.270461	0	0	0.325132	0
TCGA-76-4926-01	3.31943	Internal Validation	High	Cluster1	1	0.378082	68	male	IV	NA	0.480581	0.327	-646.65	70.9825	-575.668	NA	NA	NA	-0.639218	5.70706	0.0178494	0.261366	0	0	0.206286	5.92334e-20
TCGA-76-4927-01	3.17294	Internal Validation	High	Cluster1	1	1.46575	58	male	IV	glioblastoma	0.417465	0.32	336.289	803.108	1139.4	IDH1 wildtype	NA	Unmethylated	-0.466828	5.60714	0.00829292	0.243319	0.0362029	0	0.236373	8.99977e-19
TCGA-76-4928-01	5.45142	Internal Validation	High	Cluster1	1	0.257534	85	female	IV	NA	0.364192	0.235	-57.8551	979.705	921.85	NA	NA	NA	-0.586097	5.4352	0.00466946	0.301664	0.0310005	0	0.119215	0
TCGA-76-4929-01	2.67118	Training	High	Cluster1	1	0.30411	76	female	IV	glioblastoma	0.413212	0.364	-373.003	298.55	-74.4525	IDH1 wildtype	1p19q non-codel	Methylated	-0.779986	5.84089	0.00480768	0.27079	0	0	0.17356	0
TCGA-76-4931-01	1.92364	Internal Validation	Low	Cluster1	1	0.764384	70	female	IV	glioblastoma	0.560443	0.314	-936.065	-188.227	-1124.29	IDH1 wildtype	1p19q non-codel	Unmethylated	-0.711367	5.64557	0.00975763	0.266245	0.0139325	0	0.202321	2.9317e-19
TCGA-76-4932-01	3.13093	Internal Validation	High	Cluster1	1	3.99452	50	female	IV	glioblastoma	0.552381	0.289	-682.141	379.51	-302.631	IDH1 wildtype	NA	Methylated	-0.643209	5.60198	0.00689743	0.237804	0.0326708	0	0.206306	0
TCGA-CS-4938-01	2.37558	Internal Validation	High	Cluster2	0	9.79178	31	female	II	NA	0.602416	NA	-667.48	-108.505	-775.985	NA	NA	NA	-0.633925	5.88525	0.0100914	0.281679	0.0195354	0	0.554709	3.72582e-19
TCGA-CS-4941-01	2.95015	Training	High	Cluster1	1	0.641096	67	male	III	astrocytoma	0.552403	0.219	-365.391	903.448	538.057	IDH1 wildtype	1p19q non-codel	Methylated	-0.551915	5.78218	0.0144836	0.018007	0.025283	0	1.29877	0
TCGA-CS-4942-01	2.16572	Internal Validation	High	Cluster2	1	3.65753	44	female	III	astrocytoma	0.729989	0.126	-544.452	908.769	364.317	IDH1 mutant	1p19q non-codel	Unmethylated	-0.635869	5.66881	0.00335901	0.0488225	0.00893446	0	0.306007	5.14448e-19
TCGA-CS-4943-01	0.985038	Internal Validation	Low	Cluster2	1	3.03014	37	male	III	astrocytoma	1	0.104	-845.436	-119.843	-965.28	IDH1 mutant	1p19q non-codel	Methylated	-0.665404	5.40147	0.0111467	0.171938	0.00729111	0	0.283517	2.75687e-18
TCGA-CS-4944-01	2.40013	Training	High	Cluster2	0	5.00822	50	male	II	astrocytoma	0.593285	0.105	-663.7	129.224	-534.477	IDH1 mutant	1p19q non-codel	Methylated	-0.677494	6.10388	0.0105819	0.295713	0.1323	0	1.37985	8.13087e-18
TCGA-CS-5393-01	1.48456	Training	Low	Cluster2	0	3.34795	39	male	III	astrocytoma	0.637459	0.13	-801.906	316.247	-485.659	IDH1 mutant	1p19q non-codel	Methylated	-0.634844	5.68594	0.0114063	0.0861881	0.0185597	0	1.10657	2.07567e-19
TCGA-CS-5394-01	2.20827	Internal Validation	High	Cluster2	0	0.0219178	40	male	III	astrocytoma	0.85282	0	-1527.35	-1090.03	-2617.38	IDH1 mutant	1p19q non-codel	Methylated	-0.72085	5.4448	0.0255664	0.135083	0	0	0.703546	0
TCGA-CS-5395-01	2.51364	Internal Validation	High	Cluster1	1	1.75068	43	male	II	oligodendroglioma	0.732191	0.323	-786.916	-610.218	-1397.13	IDH1 wildtype	1p19q non-codel	Unmethylated	-0.500659	5.7549	0.0224353	0.239675	0.0608109	0	0.648538	0
TCGA-CS-5396-01	2.58056	Internal Validation	High	Cluster2	0	4.46849	53	female	III	oligodendroglioma	0.594131	0.158	-758.816	-296.354	-1055.17	IDH1 mutant	1p19q codel	Methylated	-0.733644	5.61394	0.030037	0.196085	0.0152216	0	0.0985678	0
TCGA-CS-5397-01	3.08753	Internal Validation	High	Cluster1	1	0.531507	54	female	III	astrocytoma	0.51519	0.249	-381.622	31.1261	-350.496	IDH1 wildtype	1p19q non-codel	Unmethylated	-0.633526	5.83243	0.024375	0.375218	0.0411446	0	0.339984	8.77297e-18
TCGA-CS-6186-01	2.20739	Training	High	Cluster1	1	1.47397	58	male	III	oligoastrocytoma	0.724278	0.234	-992.332	-287.609	-1279.94	IDH1 wildtype	1p19q non-codel	Unmethylated	-0.671252	5.85269	0.0116127	0.236106	0	0	0.160184	8.83326e-18
TCGA-CS-6188-01	2.98618	Training	High	Cluster1	1	2.23014	48	male	III	astrocytoma	0.379869	0.279	-383.841	334.576	-49.2649	IDH1 wildtype	1p19q non-codel	Unmethylated	-0.476314	5.67253	0.0159617	0.257286	0.0254785	0	0.180554	4.25461e-18
TCGA-CS-6290-01	1.8927	Training	Low	Cluster2	1	3.11507	31	male	III	astrocytoma	0.578917	0.155	-278.086	1187.89	909.803	IDH1 mutant	1p19q non-codel	Methylated	-0.626553	5.83865	0.00215694	0.0494239	0.00839215	0	0.771016	3.50684e-18
TCGA-CS-6666-01	1.8483	Training	Low	Cluster2	0	3.91233	22	male	III	astrocytoma	0.638876	0.168	-521.162	-70.208	-591.37	IDH1 mutant	1p19q non-codel	Methylated	-0.496849	5.61793	0.0114645	0.278655	0.0370127	0	0.46683	0
TCGA-CS-6667-01	1.83349	Internal Validation	Low	Cluster2	0	4.02466	39	female	II	astrocytoma	0.461098	0.036	-874.174	-159.96	-1034.13	IDH1 mutant	1p19q non-codel	Methylated	-0.753898	5.81619	0.0116431	0.15705	0	0	1.0596	0
TCGA-CS-6668-01	1.46087	Internal Validation	Low	Cluster2	0	4.16164	57	female	II	oligodendroglioma	0.878756	NA	-1675.26	-1089.36	-2764.63	IDH1 mutant	1p19q codel	Methylated	-0.661039	5.41229	0.024753	0.102829	0.000700494	0	0.541955	5.36949e-19
TCGA-CS-6669-01	1.49807	Training	Low	Cluster2	0	4.09315	26	female	II	oligodendroglioma	0.834002	0.218	-1277.56	-1384	-2661.56	IDH1 wildtype	1p19q non-codel	Unmethylated	-0.781749	5.95935	0.0600901	0.164029	0	0	0.251689	0
TCGA-CS-6670-01	1.94583	Internal Validation	Low	Cluster2	0	3.90685	43	male	III	oligodendroglioma	0.705667	NA	-1174.48	-922.757	-2097.23	IDH1 mutant	1p19q codel	Methylated	-0.670069	5.74738	0.0163918	0.139765	0.0317001	0	0.424874	0
TCGA-DB-5270-01	2.30112	Training	High	Cluster2	0	10.2274	38	female	III	oligoastrocytoma	0.649688	0.114	-377.702	-50.2607	-427.963	IDH1 mutant	1p19q non-codel	Methylated	-0.66652	5.81778	0.0337427	0.205281	0.0260216	0	1.02185	1.85545e-18
TCGA-DB-5273-01	2.30642	Internal Validation	High	Cluster2	0	6.83014	33	male	III	astrocytoma	0.546418	0.094	-206.54	534.067	327.527	IDH1 mutant	1p19q non-codel	Unmethylated	-0.625695	5.7838	0.0068758	0.218495	0	0	0.255558	4.05071e-18
TCGA-DB-5274-01	2.01024	Internal Validation	Low	Cluster2	0	6.27123	37	female	III	oligoastrocytoma	0.872459	0.045	-539.979	321.811	-218.168	IDH1 mutant	1p19q codel	Methylated	-0.761491	5.68284	0.00942723	0.0368382	0.0817036	0.000907842	0.779642	2.21697e-18
TCGA-DB-5275-01	1.56521	Internal Validation	Low	Cluster2	0	3.99452	36	male	III	oligoastrocytoma	0.640962	0.056	-1133.76	-310.327	-1444.09	IDH1 mutant	1p19q non-codel	Methylated	-0.57156	5.65419	0.0101911	0.157099	0.0262922	0	0.493588	0
TCGA-DB-5277-01	2.37053	Internal Validation	High	Cluster2	1	4.23836	34	male	III	astrocytoma	0.894166	0.186	-1030.61	-735.422	-1766.03	IDH1 mutant	1p19q non-codel	Methylated	-0.578042	5.54112	0.0152899	0.21664	0.0370799	0	0.650756	9.38276e-18
TCGA-DB-5278-01	1.926	Training	Low	Cluster2	0	7.59452	17	male	II	oligodendroglioma	0.713743	0.072	-935.744	-664.197	-1599.94	IDH1 mutant	1p19q codel	Methylated	-0.742137	5.69787	0.0253672	0.258797	0.023442	0	0.625527	0
TCGA-DB-5279-01	3.21635	Training	High	Cluster2	0	3.70959	59	male	II	oligodendroglioma	0.690627	0.205	-992.622	-410.451	-1403.07	IDH1 mutant	1p19q codel	Methylated	-0.699914	5.60451	0.0284091	0.176495	0.0640141	0	0.882308	0
TCGA-DB-5280-01	1.60898	Internal Validation	Low	Cluster2	0	3.04658	43	male	II	oligoastrocytoma	0.542902	0.053	-847.621	-453.653	-1301.27	IDH1 mutant	1p19q non-codel	Methylated	-0.687725	5.81083	0.0113155	0.152731	0.00212314	0	0.700747	0
TCGA-DB-5281-01	2.9998	Training	High	Cluster2	0	6.52329	61	male	III	oligoastrocytoma	0.597181	0.055	-678.941	-471.781	-1150.72	IDH1 mutant	1p19q non-codel	Methylated	-0.708839	5.58968	0.024681	0.290008	0.0681563	0	0.401458	0
TCGA-DB-A4X9-01	1.20247	Internal Validation	Low	Cluster2	0	3.86849	33	female	II	oligoastrocytoma	0.575615	0.125	-1242.24	-463.919	-1706.16	IDH1 mutant	1p19q non-codel	Methylated	-0.621438	5.84598	0.0133395	0.0480491	0.00220223	0	0.0877406	1.55167e-17
TCGA-DB-A4XA-01	1.84608	Internal Validation	Low	Cluster2	0	1.56986	30	male	II	oligoastrocytoma	0.644412	0.081	-822.069	-72.2427	-894.312	IDH1 mutant	1p19q codel	Methylated	-0.693263	5.74217	0.0127653	0.0923999	0.0241595	0	1.26862	0
TCGA-DB-A4XB-01	0.9265	Training	Low	Cluster2	0	2.51781	38	male	III	astrocytoma	0.671476	0.095	-1241.29	-483.139	-1724.43	IDH1 mutant	1p19q non-codel	Methylated	-0.552784	5.6248	0.023351	0.162051	0.01205	0	0.252425	2.20353e-18
TCGA-DB-A4XC-01	1.6929	Training	Low	Cluster2	0	3.89315	26	male	II	oligoastrocytoma	0.580432	0.143	-878.897	134.088	-744.809	IDH1 mutant	1p19q non-codel	Methylated	-0.636111	5.79305	0.0213969	0.0351585	0.0149655	0	0.773297	3.77127e-18
TCGA-DB-A4XD-01	1.35761	Internal Validation	Low	Cluster2	0	3.31507	32	male	III	astrocytoma	0.562293	0.092	-1091.19	-464.824	-1556.01	IDH1 mutant	1p19q non-codel	Methylated	-0.648802	5.68865	0.0166172	0.115737	0	0	0.216327	1.10571e-18
TCGA-DB-A4XE-01	1.22429	Training	Low	Cluster2	0	3.12055	27	female	III	oligoastrocytoma	0.726146	0.081	-1185.26	-487.001	-1672.26	IDH1 mutant	1p19q non-codel	Methylated	-0.707872	5.68502	0.0165648	0.160976	0	0	0.149413	0
TCGA-DB-A4XF-01	2.30716	Internal Validation	High	Cluster2	0	2.79726	41	female	III	astrocytoma	0.503043	0.069	-754.234	-158.032	-912.266	IDH1 mutant	1p19q non-codel	Methylated	-0.742746	5.81556	0.0312108	0.223656	0.00913201	0	0.442376	0
TCGA-DB-A4XG-01	1.51942	Internal Validation	Low	Cluster2	0	6.07945	34	male	III	oligodendroglioma	0.786749	0.071	-1631.22	-1360.07	-2991.29	IDH1 mutant	1p19q codel	Methylated	-0.731441	5.48072	0.0222718	0.112627	0.0062768	0	0.206245	1.90449e-18
TCGA-DB-A4XH-01	1.73018	Internal Validation	Low	Cluster2	0	2.63562	53	female	II	oligoastrocytoma	0.633564	0.072	-1215.32	-1117.16	-2332.48	IDH1 mutant	1p19q codel	Methylated	-0.801762	5.84324	0.0205884	0.11846	0.0242158	0	0.321326	7.91457e-19
TCGA-DB-A64L-01	2.79429	Training	High	Cluster2	0	2.01644	67	female	II	oligodendroglioma	0.784315	0.143	-1233.85	-271.539	-1505.39	IDH1 mutant	1p19q codel	Methylated	-0.864836	5.66726	0.0321408	0.0791427	0.0268503	0	0.198516	0
TCGA-DB-A64O-01	2.19067	Training	High	Cluster1	1	2.12329	59	male	II	oligoastrocytoma	0.499746	0.222	-624.69	-152.672	-777.362	IDH1 wildtype	1p19q non-codel	Unmethylated	-0.694101	6.12209	0.0203469	0.126846	0	0	0.666004	8.08422e-18
TCGA-DB-A64P-01	2.00946	Internal Validation	Low	Cluster2	0	2.50959	40	male	III	oligodendroglioma	0.680497	0.059	-874.63	-330.675	-1205.3	IDH1 mutant	1p19q codel	Methylated	-0.721784	5.62069	0.018759	0.16577	0.0260247	0	0.669745	0
TCGA-DB-A64Q-01	2.07296	Internal Validation	Low	Cluster2	0	0.49863	31	female	II	oligoastrocytoma	0.748629	0.187	-1352.43	-694.584	-2047.01	IDH1 mutant	1p19q codel	Methylated	-0.765522	5.42834	0.0218924	0.188805	0	0	0.276336	0
TCGA-DB-A64R-01	1.44449	Training	Low	Cluster2	0	2.61644	24	female	II	oligodendroglioma	0.704089	0.038	-1391.25	-1097.38	-2488.63	IDH1 mutant	1p19q codel	Methylated	-0.718841	5.64573	0.0225663	0.121998	0	0	0.289557	2.94063e-18
TCGA-DB-A64S-01	1.92363	Internal Validation	Low	Cluster2	0	2.28767	20	male	II	oligoastrocytoma	0.485194	0.06	-324.224	689.291	365.067	IDH1 mutant	1p19q non-codel	Unmethylated	-0.661274	5.77883	0.00491139	0.0614155	0	0	0.296568	9.42673e-19
TCGA-DB-A64U-01	1.25235	Training	Low	Cluster2	0	2.31781	38	female	II	oligoastrocytoma	0.605695	0.09	-1117.36	-692.991	-1810.35	IDH1 mutant	1p19q codel	Methylated	-0.700348	5.6515	0.0174549	0.201601	0	0	0.46177	0
TCGA-DB-A64V-01	2.03275	Internal Validation	Low	Cluster1	0	2.43562	54	male	II	oligodendroglioma	0.580419	0.103	-467.181	754.648	287.467	IDH1 mutant	1p19q codel	Methylated	-0.733844	5.85835	0.0101672	0.132016	0.0727978	0	1.56906	0
TCGA-DB-A64W-01	1.05227	Internal Validation	Low	Cluster2	1	1.2	65	female	III	oligoastrocytoma	0.961687	0.058	-1712.29	-1668.56	-3380.84	IDH1 mutant	1p19q codel	Methylated	-0.770951	5.43846	0.0416135	0.128513	0.0436875	0	0.210212	8.10595e-19
TCGA-DB-A64X-01	1.58466	Internal Validation	Low	Cluster2	0	1.54247	56	female	III	astrocytoma	0.596302	0.134	-1111.76	-470.228	-1581.99	IDH1 mutant	1p19q non-codel	Methylated	-0.689289	5.93828	0.0157057	0.113019	0.0479214	0	0.530342	0
TCGA-DB-A75K-01	2.44363	Internal Validation	High	Cluster2	0	1.00822	55	female	III	oligoastrocytoma	0.55458	0.098	-701.595	229.662	-471.933	IDH1 mutant	1p19q codel	Methylated	-0.721928	5.78734	6.9227e-07	0	0	0	0.343618	0
TCGA-DB-A75L-01	0.981927	Training	Low	Cluster2	0	0.936986	36	female	III	astrocytoma	0.631735	0.144	-931.6	-184.408	-1116.01	IDH1 mutant	1p19q non-codel	Methylated	-0.83858	5.73575	0.0218619	0.108948	0	0	0.333044	0
TCGA-DB-A75M-01	1.48898	Training	Low	Cluster2	0	1.49041	47	male	II	astrocytoma	0.478342	0.093	-866.277	-25.0088	-891.286	IDH1 mutant	1p19q non-codel	Methylated	-0.609811	6.0026	0.00706074	0.0695819	0	0	0.268146	0
TCGA-DB-A75O-01	1.97817	Training	Low	Cluster2	0	2.56164	29	male	III	astrocytoma	0.573829	0.104	-744.895	561.068	-183.828	IDH1 mutant	1p19q non-codel	Methylated	-0.66346	5.99743	2.20027e-06	0	0	0	0.0707511	8.71675e-18
TCGA-DB-A75P-01	2.42513	Internal Validation	High	Cluster2	0	1.34795	25	female	II	astrocytoma	0.484818	0.222	-634.371	-245.449	-879.82	IDH1 wildtype	1p19q non-codel	Unmethylated	-0.814252	6.11935	0.0228697	0.115546	0.144476	0	1.30757	4.73341e-18
TCGA-DH-5140-01	2.13015	Internal Validation	High	Cluster2	1	1.66301	38	female	III	oligoastrocytoma	0.660686	0.45	-881.581	-573.149	-1454.73	IDH1 wildtype	1p19q non-codel	Unmethylated	-0.725196	5.56914	0.0155375	0.289293	0.0787253	0	0.39876	0
TCGA-DH-5141-01	2.57252	Training	High	Cluster2	0	2.65205	32	male	III	oligodendroglioma	0.647096	0.024	-967.307	-367.954	-1335.26	IDH1 mutant	1p19q codel	Methylated	-0.821805	5.77952	0.0141307	0.180578	0	0	0.542415	7.31602e-18
TCGA-DH-5142-01	3.3268	Training	High	Cluster1	0	5.32329	29	male	III	astrocytoma	0.592432	0.105	-256.285	1145.35	889.065	IDH1 mutant	1p19q non-codel	Methylated	-0.589367	5.69473	0.0133188	0.193694	0.0183338	0	0.362782	5.73929e-18
TCGA-DH-5143-01	2.16092	Internal Validation	High	Cluster2	0	3.83836	30	male	III	oligoastrocytoma	0.706521	0.107	-666.109	-19.356	-685.465	IDH1 mutant	1p19q non-codel	Methylated	-0.667808	5.78645	0.0122379	0.19706	0	0	0.432228	1.55429e-17
TCGA-DH-5144-01	2.11585	Training	High	Cluster2	0	2.04932	56	female	III	oligodendroglioma	0.851596	0.035	-1321.99	-680.314	-2002.31	IDH1 mutant	1p19q codel	Methylated	-0.711885	5.44811	0.0150212	0.140204	0.027197	0	0.367333	2.5329e-18
TCGA-DH-A669-01	2.32221	Internal Validation	High	Cluster2	1	2.51781	70	male	III	oligodendroglioma	0.904805	NA	-992.155	-63.632	-1055.79	IDH1 mutant	1p19q codel	Methylated	-0.604888	5.33057	0.0103356	0.0270428	0.00785912	0	0.226341	0
TCGA-DH-A66B-01	2.24264	Training	High	Cluster1	0	3.50411	52	male	III	astrocytoma	0.496585	0.089	-523.899	754.513	230.615	IDH1 mutant	1p19q non-codel	Methylated	-0.553461	5.76526	0.0148714	0.18566	0.00913879	0	0.563178	0
TCGA-DH-A66D-01	1.58501	Internal Validation	Low	Cluster2	0	2.31781	43	female	III	astrocytoma	0.525688	0.058	-721.903	394.681	-327.222	IDH1 mutant	1p19q non-codel	Methylated	-0.67211	5.7542	0.00916735	0.0429607	0	0	0.238389	2.40409e-18
TCGA-DH-A66F-01	1.64843	Training	Low	Cluster2	0	1.43288	49	male	II	oligodendroglioma	0.653014	0.086	-1256.65	-709.806	-1966.45	IDH1 mutant	1p19q codel	Methylated	-0.755007	5.70872	0.0129907	0.13445	0.00762123	0	0.705403	9.33891e-18
TCGA-DH-A66G-01	3.15482	Internal Validation	High	Cluster2	0	1.43288	49	female	III	oligodendroglioma	0.45731	0.094	-388.665	133.368	-255.297	IDH1 mutant	1p19q non-codel	Methylated	-0.766207	5.70161	0.0319826	0.200001	0.015261	0	0.641785	0
TCGA-DH-A7UR-01	1.41694	Internal Validation	Low	Cluster2	0	4.52055	59	female	III	oligodendroglioma	0.735362	0.17	-1101.95	-986.002	-2087.95	IDH1 mutant	1p19q codel	Methylated	-0.698743	5.61948	0.024339	0.119971	0.0123891	0	0.211425	0
TCGA-DH-A7US-01	1.3245	Training	Low	Cluster2	0	1.93425	50	male	II	oligodendroglioma	0.648228	0.146	-1199.5	-534.308	-1733.81	IDH1 mutant	1p19q codel	Methylated	-0.66909	5.81406	0.0135116	0.152739	0.0523238	0	0.71867	0
TCGA-DH-A7UT-01	0.986417	Training	Low	Cluster2	1	1.45479	30	male	III	astrocytoma	0.465476	0.112	-944.271	90.778	-853.493	IDH1 mutant	1p19q non-codel	Methylated	-0.663319	5.87555	0.00878664	0.0361271	0	0	0.283379	2.29281e-18
TCGA-DH-A7UU-01	0.802211	Training	Low	Cluster2	0	1.14247	43	male	III	astrocytoma	0.618978	0.124	-1086.46	-389.859	-1476.32	IDH1 mutant	1p19q non-codel	Methylated	-0.816257	5.79335	0.0163853	0.100334	0.00264717	0	0.300977	6.50344e-19
TCGA-DH-A7UV-01	0.885958	Internal Validation	Low	Cluster2	0	1.55068	49	male	III	astrocytoma	0.493558	0.11	-995.397	38.3301	-957.067	IDH1 mutant	1p19q non-codel	Methylated	-0.677467	5.87659	0.0103061	0.0431151	0	0	0.258418	0
TCGA-DU-5847-01	3.5776	Internal Validation	High	Cluster1	0	1.50137	34	female	III	astrocytoma	0.521367	0.214	-243.312	887.674	644.362	IDH1 wildtype	1p19q non-codel	Methylated	-0.646213	5.76483	0.00619349	0.286	0.0185986	0	1.30498	0
TCGA-DU-5849-01	2.29828	Internal Validation	High	Cluster2	0	1.2137	48	male	II	oligodendroglioma	0.713921	0.097	-1123.22	-584.02	-1707.24	IDH1 mutant	1p19q codel	Methylated	-0.613981	5.74267	0.0280244	0.160809	0.0338817	0	0.688887	0
TCGA-DU-5852-01	2.46626	Training	High	Cluster1	1	0.561644	61	female	III	oligoastrocytoma	0.546291	0.395	-250.288	401.775	151.487	IDH1 wildtype	1p19q non-codel	Methylated	-0.599442	5.574	0.0081415	0.148014	0.0438246	0	0.885994	0
TCGA-DU-5853-01	1.48522	Internal Validation	Low	Cluster2	0	1.11507	29	male	II	oligoastrocytoma	0.614756	0.169	-583.305	551.615	-31.6901	IDH1 mutant	1p19q non-codel	Methylated	-0.669766	5.67614	0.0122596	0.190074	0.0370877	0	1.22491	0
TCGA-DU-5854-01	2.75196	Training	High	Cluster1	0	0.70411	57	female	III	astrocytoma	0.375407	0.219	-92.1803	577.852	485.672	IDH1 wildtype	1p19q non-codel	Unmethylated	-0.568903	5.88794	0.0206554	0.296391	0.0869363	0	1.41399	6.84886e-18
TCGA-DU-5855-01	2.1614	Internal Validation	High	Cluster2	0	0.567123	49	female	III	oligoastrocytoma	0.516281	0.113	-659.18	460.199	-198.98	IDH1 mutant	1p19q non-codel	Methylated	-0.70635	5.75415	0.00450982	0.0308922	0	0	0.317022	0
TCGA-DU-5870-01	1.87835	Internal Validation	Low	Cluster2	0	15.1945	34	female	II	oligodendroglioma	0.658493	0.123	-767.653	-243.112	-1010.77	IDH1 mutant	1p19q codel	Methylated	-0.68558	5.69728	0.0161813	0.119714	0.00465069	0	0.553485	0
TCGA-DU-5871-01	2.30566	Internal Validation	High	Cluster2	0	1.57808	37	female	II	oligoastrocytoma	0.622905	0.12	-893.218	188.789	-704.429	IDH1 mutant	1p19q non-codel	Methylated	-0.695266	5.70949	0.0109035	0.0869063	0	0	0.0266765	0
TCGA-DU-5872-01	2.50568	Training	High	Cluster2	0	1.45753	43	female	II	oligoastrocytoma	0.602853	0.145	-453.974	380.092	-73.8821	IDH1 mutant	1p19q non-codel	Methylated	-0.730869	5.83305	0.00974242	0.157063	0.0411535	0	1.13072	1.98891e-18
TCGA-DU-5874-01	2.08676	Training	Low	Cluster2	0	1.26301	62	female	II	oligodendroglioma	0.795823	0.029	-1403.31	-1052.63	-2455.94	IDH1 mutant	1p19q codel	Methylated	-0.761462	5.49331	0.0272633	0.0815841	0.0273466	0	0.780384	0
TCGA-DU-6392-01	3.0392	Internal Validation	High	Cluster2	0	17.5973	35	female	III	astrocytoma	0.693755	0.278	-285.762	240.355	-45.407	IDH1 wildtype	1p19q non-codel	Unmethylated	-0.661968	5.54692	0.0200075	0.268776	0.0226275	0	0.477563	0
TCGA-DU-6393-01	1.49407	Internal Validation	Low	Cluster2	1	4.34247	66	male	III	oligodendroglioma	0.7451	NA	-1519.46	-1028.66	-2548.12	IDH1 mutant	1p19q codel	Methylated	-0.61057	5.52339	0.019642	0.0890657	0.0250487	0	0.0354421	0
TCGA-DU-6394-01	2.86448	Training	High	Cluster2	1	1.86849	53	male	III	oligodendroglioma	0.629381	0.114	-1158.75	-503.791	-1662.54	IDH1 mutant	1p19q codel	Methylated	-0.717211	5.35625	0.0190786	0.176737	0	0	0.117864	0
TCGA-DU-6395-01	2.1592	Training	High	Cluster2	1	4.08493	31	male	II	oligoastrocytoma	0.6009	0.099	-864.038	-41.2051	-905.243	IDH1 mutant	1p19q non-codel	Methylated	-0.604639	5.85537	2.89852e-07	0.138852	0.0134068	0	0.397554	0
TCGA-DU-6396-01	3.23669	Training	High	Cluster1	1	6.26301	31	female	III	oligoastrocytoma	0.423266	0.107	-3.43792	1486.23	1482.79	IDH1 mutant	1p19q non-codel	Methylated	-0.47381	5.52372	0.00895814	0	0.0306143	0	0.713977	0
TCGA-DU-6397-01	2.23483	Training	High	Cluster2	1	3.83836	45	male	III	oligodendroglioma	0.674247	0.12	-910.58	-324.853	-1235.43	IDH1 mutant	1p19q codel	Methylated	-0.781816	5.72623	0.0158916	0.119137	0.0226888	0	0.966737	1.47206e-18
TCGA-DU-6399-01	1.95871	Internal Validation	Low	Cluster2	1	5.47945	54	male	II	oligodendroglioma	0.657333	0.148	-521.159	298.688	-222.471	IDH1 mutant	1p19q non-codel	Methylated	-0.639993	5.65833	0.0164661	0.145288	0.0133444	0	0.296967	0
TCGA-DU-6400-01	1.80998	Internal Validation	Low	Cluster2	1	0.10137	66	female	II	oligodendroglioma	0.781202	NA	-1368.05	-738.293	-2106.34	IDH1 mutant	1p19q codel	Methylated	-0.737032	5.71201	0.0179505	0.0822429	0.0710064	0	0.288702	0
TCGA-DU-6401-01	2.27551	Internal Validation	High	Cluster2	1	7.28767	31	female	II	oligodendroglioma	0.480283	0.084	-484.22	-35.5062	-519.726	IDH1 mutant	1p19q non-codel	Methylated	-0.693648	5.7686	0.010803	0.193995	0	0	0.889377	4.41196e-18
TCGA-DU-6402-01	3.89144	Internal Validation	High	Cluster1	1	0.586301	52	male	III	astrocytoma	0.433163	0.242	-158.876	865.892	707.015	IDH1 wildtype	1p19q non-codel	Unmethylated	-0.656199	5.54575	0.00425957	0.2138	0.0840549	0	2.48997	0
TCGA-DU-6403-01	1.75192	Internal Validation	Low	Cluster2	1	0.969863	60	female	III	oligoastrocytoma	0.770707	0.412	-771.702	365.818	-405.885	IDH1 wildtype	1p19q non-codel	Unmethylated	-0.764158	5.57323	0.0105998	0.221514	0	0	0.305779	0
TCGA-DU-6404-01	2.98653	Internal Validation	High	Cluster1	1	11.1452	24	female	III	oligodendroglioma	0.330561	0.229	-655.233	-360.568	-1015.8	IDH1 wildtype	1p19q non-codel	Unmethylated	-0.514399	5.82435	0.0173644	0.244494	0	0	0.501342	0
TCGA-DU-6405-01	2.34684	Internal Validation	High	Cluster1	1	1.65753	51	female	III	astrocytoma	0.579142	0.358	-892.258	-12.3062	-904.564	IDH1 wildtype	1p19q non-codel	Methylated	-0.66462	5.76637	0.011735	0.355507	0	0	0.299729	6.24071e-18
TCGA-DU-6406-01	2.92541	Internal Validation	High	Cluster1	1	1.40274	59	female	III	oligoastrocytoma	0.599762	0.364	-731.313	126.625	-604.689	IDH1 wildtype	1p19q non-codel	Unmethylated	-0.638406	5.52271	0.0115804	0.092324	0.0247118	0	0.144592	0
TCGA-DU-6407-01	2.06876	Training	Low	Cluster2	1	7.87671	35	female	II	oligodendroglioma	0.658724	0.098	-902.053	-323.921	-1225.97	IDH1 mutant	1p19q non-codel	Methylated	-0.517905	5.74778	0.00823586	0.132134	9.25761e-05	0	0.217727	1.26967e-18
TCGA-DU-6408-01	1.95549	Training	Low	Cluster2	1	9.50685	23	female	III	oligodendroglioma	0.640714	0.115	-897.892	43.7925	-854.099	IDH1 mutant	1p19q non-codel	Methylated	-0.622171	5.68956	0.0157315	0.0835542	0.0251986	0	0.249609	0
TCGA-DU-6410-01	1.89406	Internal Validation	Low	Cluster2	0	0.663014	56	male	III	oligodendroglioma	0.946137	0.082	-1577.44	-1473.68	-3051.12	IDH1 mutant	1p19q codel	Methylated	-0.682429	5.1915	0.0260942	0.0602308	0.0469058	0	0.0515895	1.33829e-18
TCGA-DU-6542-01	2.12358	Internal Validation	High	Cluster1	0	0.2	25	male	III	oligoastrocytoma	0.630668	0.085	-572.327	428.853	-143.474	IDH1 mutant	1p19q non-codel	Methylated	-0.528205	5.64935	0.0168236	0.256302	0.0086787	0	0.36459	0
TCGA-DU-7006-01	3.38968	Training	High	Cluster1	1	0.956164	60	female	III	astrocytoma	0.381673	0.227	-145.071	974.717	829.646	IDH1 wildtype	1p19q non-codel	Methylated	-0.480137	5.46046	0.0172571	0.317564	0.0553916	0	1.51074	0
TCGA-DU-7007-01	3.80211	Training	High	Cluster1	1	5.24658	33	male	II	astrocytoma	0.304916	0.099	124.446	672.972	797.418	IDH1 mutant	1p19q non-codel	Methylated	-0.483953	5.665	0.021602	0.337827	0.070788	0.00157144	1.52992	0.00452253
TCGA-DU-7008-01	1.86572	Training	Low	Cluster2	0	13.0192	41	female	II	oligodendroglioma	0.828828	0.064	-1371.99	-787.564	-2159.56	IDH1 mutant	1p19q non-codel	Methylated	-0.614202	5.64928	0.0198794	0.148947	0	0	0.194821	0
TCGA-DU-7009-01	1.90903	Training	Low	Cluster2	1	12.863	32	female	II	oligodendroglioma	0.805045	0.085	-1363.44	-1134.96	-2498.39	IDH1 mutant	1p19q codel	Methylated	-0.678697	5.5263	0.0205773	0.169061	0.0320019	0	0.754561	0
TCGA-DU-7010-01	2.34223	Training	High	Cluster2	1	1.24932	58	female	III	astrocytoma	0.691647	0.214	-707.787	-490.795	-1198.58	IDH1 mutant	1p19q non-codel	Methylated	-0.752442	5.71602	0.0196579	0.449873	0.0176071	0	0.34923	1.70122e-18
TCGA-DU-7011-01	2.35762	Training	High	Cluster2	1	8.76712	25	male	II	oligoastrocytoma	0.537156	0.107	156.844	751.481	908.325	IDH1 mutant	1p19q non-codel	Unmethylated	-0.675379	5.65722	0.0207882	0.186409	0.00472191	0	0.823199	8.29882e-18
TCGA-DU-7012-01	3.62764	Internal Validation	High	Cluster1	1	0.545205	74	female	III	astrocytoma	0.350304	0.23	690.762	1646.68	2337.44	IDH1 wildtype	1p19q non-codel	Methylated	-0.567088	5.69852	0.0152591	0.386426	0.0725468	0	4.07001	0
TCGA-DU-7013-01	2.43377	Internal Validation	High	Cluster1	1	0.736986	59	male	III	astrocytoma	0.629391	0.313	-728.401	65.212	-663.189	IDH1 wildtype	1p19q non-codel	Unmethylated	-0.586364	5.34992	0.0153548	0.293266	0.0735341	0.00109427	0.874122	0
TCGA-DU-7014-01	2.07811	Internal Validation	Low	Cluster2	1	9.78356	59	male	II	oligodendroglioma	0.616368	0.087	-759.431	-114.638	-874.069	NA	1p19q non-codel	Methylated	-0.729631	5.59743	0.01047	0.191576	0.0522861	0.00159916	0.552841	0
TCGA-DU-7015-01	1.96897	Training	Low	Cluster2	0	7.56438	41	female	II	oligodendroglioma	0.722825	0.112	-600.509	696.139	95.6293	IDH1 mutant	1p19q non-codel	Methylated	-0.529532	5.58048	0.00959855	0.168969	0.020066	0	0.806192	0
TCGA-DU-7018-01	1.65741	Training	Low	Cluster2	1	2.55616	57	female	III	oligodendroglioma	0.89127	0.061	-1319.05	-1096.45	-2415.5	IDH1 mutant	1p19q codel	Methylated	-0.71436	5.3195	0.0183409	0.107137	0	0	0.298057	1.02448e-18
TCGA-DU-7019-01	2.91317	Internal Validation	High	Cluster2	0	2.19178	39	male		oligoastrocytoma	0.573484	0.09	-425.688	30.5193	-395.168	IDH1 mutant	1p19q non-codel	Methylated	-0.754696	5.6405	0.0220974	0.252046	0	0	0.345332	5.66413e-20
TCGA-DU-7290-01	3.7412	Internal Validation	High	Cluster1	1	0.863014	45	female	III	astrocytoma	0.353653	0.237	13.3089	1168.24	1181.55	IDH1 wildtype	1p19q non-codel	Unmethylated	-0.474608	5.72657	0.0145813	0.319414	0.0388559	0	0.996239	0
TCGA-DU-7292-01	2.69069	Training	High	Cluster2	1	0.663014	69	male	III	astrocytoma	0.668915	0.301	-941.822	-810.682	-1752.5	IDH1 wildtype	1p19q non-codel	Methylated	-0.665392	5.79938	0.0421718	0.307273	0.000187152	0	0.54864	6.82722e-19
TCGA-DU-7294-01	1.89005	Internal Validation	Low	Cluster2	0	7.86027	53	female	II	oligodendroglioma	0.831539	0.047	-1171.49	-746.373	-1917.87	IDH1 mutant	1p19q codel	Methylated	-0.672926	5.36679	0.0194899	0.210096	0.00695293	0	0.695107	1.76866e-19
TCGA-DU-7298-01	1.51242	Internal Validation	Low	Cluster2	1	1.57808	38	female	III	astrocytoma	0.774407	0.06	-975.205	-116.617	-1091.82	IDH1 mutant	1p19q non-codel	Methylated	-0.72667	5.55779	0.0138715	0.225777	0.000654298	0	0.335562	0
TCGA-DU-7299-01	1.70476	Training	Low	Cluster2	1	3.66849	33	male	III	astrocytoma	0.685186	0.065	-973.717	6.74337	-966.973	IDH1 mutant	1p19q non-codel	Methylated	-0.704639	5.59192	0.0131115	0.192877	0.0383941	0	0.602152	7.70891e-18
TCGA-DU-7300-01	2.68428	Internal Validation	High	Cluster2	1	5.16712	53	female	III	oligodendroglioma	0.720364	0.113	-780.604	-404.358	-1184.96	IDH1 mutant	1p19q codel	Methylated	-0.687073	5.65393	0.0350435	0.222049	0.045142	0	0.722602	0
TCGA-DU-7301-01	2.5365	Training	High	Cluster2	1	2.1589	53	male	II	oligodendroglioma	0.566527	0.104	-335.344	427.409	92.065	IDH1 mutant	1p19q non-codel	Methylated	-0.538718	5.64475	0.0204488	0.282768	0.00840337	0	0.221951	0
TCGA-DU-7302-01	2.43711	Training	High	Cluster2	0	5.02466	48	female	III	oligodendroglioma	0.803088	0.074	-1388.15	-1064.38	-2452.54	IDH1 mutant	1p19q codel	Methylated	-0.825441	5.47235	0.037298	0.197873	0	0	0.611282	0
TCGA-DU-7304-01	2.71638	Internal Validation	High	Cluster2	1	1.94247	43	male	III	oligoastrocytoma	0.521531	0.086	-653.763	255.239	-398.524	IDH1 mutant	1p19q non-codel	Methylated	-0.606157	5.78494	0.0243532	0.197307	0.00343348	0	0.56027	0
TCGA-DU-7306-01	2.94346	Internal Validation	High	Cluster2	0	3.49863	67	male	II	oligoastrocytoma	0.588909	0.15	-655.296	-19.3027	-674.599	IDH1 mutant	1p19q non-codel	Methylated	-0.509905	5.80459	0.0132081	0.190435	0	0	0.212643	0
TCGA-DU-7309-01	2.30827	Training	High	Cluster2	0	0.230137	41	female	III	oligodendroglioma	0.647098	0.064	-724.883	-413.912	-1138.79	IDH1 mutant	1p19q non-codel	Methylated	-0.758204	5.76791	0.0358155	0.182142	0	0	0.395425	0
TCGA-DU-8158-01	3.21573	Internal Validation	High	Cluster1	1	0.424658	57	female	III	astrocytoma	0.345015	0.237	-84.2199	854.936	770.716	IDH1 wildtype	1p19q non-codel	Unmethylated	-0.551091	5.97188	0.021888	0.28831	0.06639	0.00398424	3.46923	6.51228e-19
TCGA-DU-8161-01	3.21233	Training	High	Cluster1	1	1.97808	63	female	III	oligoastrocytoma	0.5066	0.269	-25.7266	1031.38	1005.65	IDH1 wildtype	1p19q non-codel	Unmethylated	-0.723815	5.90462	0.0167322	0.0663495	0.0259248	0	2.19322	9.02212e-19
TCGA-DU-8162-01	2.7435	Training	High	Cluster2	1	1.21644	61	female	III	oligoastrocytoma	0.652772	0.198	-736.82	-611.514	-1348.33	IDH1 wildtype	1p19q non-codel	Unmethylated	-0.774663	5.80764	0.04323	0.293675	0	0	0.20987	0
TCGA-DU-8163-01	1.87303	Training	Low	Cluster2	0	1.72329	29	male	III	oligoastrocytoma	0.553746	0.112	-541.053	505.355	-35.6983	IDH1 mutant	1p19q non-codel	Unmethylated	-0.669606	5.64718	0.0104865	0.20248	0.000112329	0	0.781262	1.51119e-18
TCGA-DU-8164-01	1.86971	Training	Low	Cluster2	0	1.78356	51	male	II	oligodendroglioma	0.777669	0.068	-1377.74	-1114.86	-2492.6	IDH1 mutant	1p19q codel	Methylated	-0.700987	5.51167	0.0266692	0.142629	0.0163651	0	0.145542	1.10461e-18
TCGA-DU-8165-01	2.97609	Training	High	Cluster1	0	1.59452	60	female	III	oligodendroglioma	0.500629	0.271	84.2551	661.692	745.947	IDH1 wildtype	1p19q non-codel	Unmethylated	-0.49294	5.5625	0.0235542	0.357013	0.0844138	0	1.5915	5.02117e-18
TCGA-DU-8166-01	2.17658	Internal Validation	High	Cluster2	0	1.4137	29	female	II	oligoastrocytoma	0.545792	0.084	-834.803	-105.077	-939.88	IDH1 mutant	1p19q non-codel	Methylated	-0.615882	5.53365	0.0131638	0.220892	0	0	0.87008	0
TCGA-DU-8167-01	2.06518	Training	Low	Cluster2	0	1.29041	69	female	II	oligoastrocytoma	0.608255	0.07	-359.409	423.312	63.9032	IDH1 mutant	1p19q non-codel	Methylated	-0.612505	5.77657	0.00207841	0.127895	0	0	0.338767	3.22477e-19
TCGA-DU-8168-01	2.016	Training	Low	Cluster2	0	1.18082	55	female	III	oligodendroglioma	0.853682	0.039	-1635.29	-1014.69	-2649.98	IDH1 mutant	1p19q codel	Methylated	-0.791702	5.30009	0.0318018	0.107387	0.0324514	0	0.251406	0
TCGA-DU-A5TP-01	3.15433	Training	High	Cluster1	0	2.7726	33	male	III	astrocytoma	0.593436	0.096	-451.24	1266.52	815.28	IDH1 mutant	1p19q non-codel	Methylated	-0.618258	5.27164	0.0133848	0.161478	0.0166177	0	0.637403	2.2215e-18
TCGA-DU-A5TR-01	2.66635	Training	High	Cluster1	0	2.48767	51	male	II	oligoastrocytoma	0.327794	0.127	-110.145	1655.27	1545.12	IDH1 mutant	1p19q non-codel	Methylated	-0.506745	5.9969	5.72907e-07	0	0.0927934	0.00347241	1.57651	1.08172e-18
TCGA-DU-A5TS-01	1.15483	Internal Validation	Low	Cluster2	0	2.6411	42	male	II	oligodendroglioma	0.599007	0.163	-1020.55	-187.315	-1207.87	IDH1 mutant	1p19q non-codel	Methylated	-0.695235	5.98303	0.00977281	0.0449032	0.0231692	0	0.332848	0
TCGA-DU-A5TT-01	2.42937	Internal Validation	High	Cluster1	0	2.03562	70	male	III	oligodendroglioma	0.401965	0.254	-564.371	-88.6165	-652.988	IDH1 wildtype	1p19q non-codel	Methylated	-0.700035	5.94609	0.0189589	0.114481	0	0	0.485219	0
TCGA-DU-A5TU-01	1.81809	Training	Low	Cluster1	0	2.18082	62	female	II	astrocytoma	0.518998	0.137	-452.455	839.578	387.123	IDH1 mutant	1p19q non-codel	Methylated	-0.564383	5.71625	0.00527773	0	0.00952446	0	0.242651	0
TCGA-DU-A5TW-01	1.04569	Internal Validation	Low	Cluster2	0	2.08219	33	female	III	astrocytoma	0.624307	0.181	-1232.51	-470.358	-1702.87	IDH1 mutant	1p19q non-codel	Methylated	-0.627433	5.5839	0.0058237	0.0905649	0	5.03647e-05	0.279061	8.16262e-19
TCGA-DU-A5TY-01	2.95782	Internal Validation	High	Cluster1	1	2.83014	46	female	III	astrocytoma	0.349508	0.286	45.2972	1255.01	1300.31	IDH1 wildtype	1p19q non-codel	Methylated	-0.535187	5.57728	6.89242e-06	0.249227	0.0330383	0	1.1244	1.64698e-18
TCGA-DU-A6S2-01	2.44287	Training	High	Cluster2	0	2.12877	37	female	II	oligodendroglioma	0.631638	0.108	-1337.71	-922.748	-2260.46	IDH1 mutant	1p19q codel	Methylated	-0.823127	5.72429	0.0363703	0.151429	0.0198943	0	0.337182	4.74502e-18
TCGA-DU-A6S3-01	1.51465	Internal Validation	Low	Cluster2	0	1.79726	60	male	II	oligodendroglioma	0.766471	0.091	-1408.1	-1165.6	-2573.7	IDH1 mutant	1p19q codel	Methylated	-0.781805	5.77826	0.0249094	0.0619676	0.0508062	0	0.117908	9.04294e-19
TCGA-DU-A6S6-01	1.38074	Training	Low	Cluster2	0	7.92603	35	female	II	oligoastrocytoma	0.689112	0.149	-1479.71	-1379.38	-2859.08	IDH1 mutant	1p19q codel	Methylated	-0.705889	5.87691	0.0397555	0.0828808	0.0362889	0	0.410239	4.2052e-18
TCGA-DU-A6S7-01	1.00169	Training	Low	Cluster2	0	1.74795	27	female	III	astrocytoma	0.56569	0.136	-917.324	210.659	-706.665	IDH1 mutant	1p19q non-codel	Methylated	-0.687748	5.79513	0.00716286	0	0	0	0.189187	0
TCGA-DU-A6S8-01	1.41262	Internal Validation	Low	Cluster2	0	1.85753	74	female	III	oligodendroglioma	0.82655	0.207	-1352.17	-856.878	-2209.05	IDH1 mutant	1p19q codel	Methylated	-0.812625	5.46471	0.0197853	0.0508221	0.0351927	0	0.248826	0
TCGA-DU-A76K-01	1.8933	Internal Validation	Low	Cluster2	1	0.950685	87	male	II	oligodendroglioma	0.593353	0.257	-1068.49	-1208.09	-2276.57	IDH1 wildtype	1p19q non-codel	Unmethylated	-0.555285	6.0207	0.0257263	0.109558	0	0	0.228051	3.16942e-18
TCGA-DU-A76L-01	2.89164	Internal Validation	High	Cluster1	1	2.23014	54	male	III	oligodendroglioma	0.343527	0.305	353.814	757.602	1111.42	IDH1 wildtype	1p19q non-codel	Methylated	-0.585411	5.35723	0.0109098	0.257596	0.0101567	0	0.323708	0
TCGA-DU-A76O-01	1.22017	Training	Low	Cluster2	0	1.43014	30	male	II	astrocytoma	0.653293	0.11	-782.907	737.956	-44.9507	IDH1 mutant	1p19q non-codel	Methylated	-0.764788	5.82821	0.00649772	0	0.0100681	0	0.525775	2.52486e-18
TCGA-DU-A76R-01	2.19489	Internal Validation	High	Cluster2	1	1.77534	51	male	III	oligodendroglioma	0.550891	0.138	-802.468	-695.764	-1498.23	IDH1 mutant	1p19q codel	Methylated	-0.654684	5.70612	0.0287124	0.0640783	0	0	1.21884	0
TCGA-DU-A7T6-01	1.58366	Internal Validation	Low	Cluster2	1	1.49863	73	female	III	oligodendroglioma	0.796582	0.3	-857.529	-725.534	-1583.06	IDH1 mutant	1p19q codel	Methylated	-0.507926	5.6238	0.0199851	0.123107	0.047641	0	0.265879	0
TCGA-DU-A7T8-01	1.76936	Training	Low	Cluster2	1	11.5863	35	male	III	oligoastrocytoma	0.534947	0.097	-424.512	308.922	-115.59	IDH1 mutant	1p19q non-codel	Methylated	-0.497597	5.78234	0.011771	0.0235682	0.00772058	0	0.542785	0
TCGA-DU-A7TA-01	1.37952	Training	Low	Cluster2	0	7.0274	32	male	II	oligodendroglioma	0.508911	0.142	-544.241	388.807	-155.435	IDH1 mutant	1p19q non-codel	Methylated	-0.592274	5.54834	0.0155392	0.0901934	0.00469083	0	0.106497	0
TCGA-DU-A7TB-01	1.51474	Internal Validation	Low	Cluster2	0	4.29315	56	male	II	oligodendroglioma	0.632227	0.42	-1061.06	-697.832	-1758.89	IDH1 wildtype	1p19q non-codel	Unmethylated	-0.667191	6.03616	0.0446783	0.292764	0.0839114	0	0.247779	0
TCGA-DU-A7TC-01	1.19408	Training	Low	Cluster2	0	3.11507	32	male	II	astrocytoma	0.827654	0.065	-1284.33	-722.074	-2006.41	IDH1 mutant	1p19q non-codel	Methylated	-0.774344	5.94018	0.0246883	0.02837	0.0109513	0	0.140329	4.41834e-18
TCGA-DU-A7TD-01	2.58341	Training	High	Cluster1	1	0.624658	52	male	III	oligoastrocytoma	0.522692	0.415	-224.329	947.665	723.336	IDH1 wildtype	1p19q non-codel	Unmethylated	-0.569827	5.46479	0.0108381	0	0.0130731	0	0.803005	3.45361e-18
TCGA-DU-A7TG-01	1.96678	Training	Low	Cluster2	1	3.70137	40	male	II	oligodendroglioma	0.68783	0.154	-800.931	-467.81	-1268.74	IDH1 mutant	1p19q non-codel	Methylated	-0.74913	5.90303	0.0616121	0.137003	0	0	0.40515	2.27388e-18
TCGA-DU-A7TI-01	2.47104	Internal Validation	High	Cluster2	1	3.2411	32	male	III	NA	0.560931	0.155	-652.323	466.954	-185.369	NA	1p19q non-codel	Methylated	-0.706372	5.71267	0.0112391	0.0622998	0	0	0.206417	0
TCGA-DU-A7TJ-01	2.82687	Training	High	Cluster1	0	0.0465753	55	male	III	astrocytoma	0.558861	0.408	-646.081	140.949	-505.132	IDH1 wildtype	1p19q non-codel	Methylated	-0.474491	5.60404	0.0148591	0.15911	0.0230717	0	0.0813393	2.622e-18
TCGA-E1-5302-01	2.4301	Training	High	Cluster2	1	4.17808	41	male	III	astrocytoma	0.570026	0.081	-549.191	473.816	-75.3751	IDH1 mutant	1p19q non-codel	Methylated	-0.619154	5.75984	0.0125799	0.118773	0	0	0.138825	1.05538e-17
TCGA-E1-5303-01	1.95555	Internal Validation	Low	Cluster2	1	5.62192	38	male	III	astrocytoma	0.551397	0.112	-353.101	937.118	584.017	IDH1 mutant	1p19q non-codel	Methylated	-0.64273	5.76429	1.02395e-06	0	0	0	0.147829	0
TCGA-E1-5304-01	0.816031	Training	Low	Cluster2	1	3.4274	42	male	III	astrocytoma	0.998138	0.222	-1734.87	-1205.02	-2939.89	IDH1 mutant	1p19q non-codel	Unmethylated	-0.467863	5.49049	0.00949679	0.209397	0.0682735	0	0.0589931	7.89516e-18
TCGA-E1-5305-01	1.89332	Training	Low	Cluster2	1	6.66575	34	male	III	astrocytoma	0.692095	0.106	-838.504	-199.339	-1037.84	IDH1 mutant	1p19q non-codel	Methylated	-0.743674	5.66006	0.0143944	0.166404	0	0	1.11431	1.24569e-18
TCGA-E1-5307-01	1.90459	Internal Validation	Low	Cluster2	1	4.8274	62	female	III	astrocytoma	0.728628	0.086	-1039.89	-128.071	-1167.96	IDH1 mutant	1p19q non-codel	Methylated	-0.619498	5.70495	0.0176284	0.123367	0	0	0.325326	2.21701e-18
TCGA-E1-5311-01	2.08326	Training	Low	Cluster2	1	11.189	31	male	III	oligodendroglioma	0.69993	0.06	-1261.02	-978.014	-2239.03	IDH1 mutant	1p19q codel	Methylated	-0.70587	5.53092	0.0198511	0.104227	0.0180284	0	0.511369	0
TCGA-E1-5318-01	1.86015	Internal Validation	Low	Cluster2	1	6.51781	42	female	II	oligodendroglioma	0.670405	0.003	-773.021	-517.266	-1290.29	IDH1 mutant	1p19q codel	Methylated	-0.654168	5.35225	0.0213272	0.11965	0	0	0	0
TCGA-E1-5319-01	2.66639	Internal Validation	High	Cluster2	1	7.96438	48	female	II	oligodendroglioma	0.603077	NA	-862.211	-278.16	-1140.37	IDH1 mutant	1p19q codel	Methylated	-0.861098	5.6973	0.0220215	0.240317	0.040123	0	2.67005	3.25369e-18
TCGA-E1-5322-01	1.69585	Internal Validation	Low	Cluster2	1	10.8986	38	female	II	oligoastrocytoma	0.689711	0.077	-660.737	574.734	-86.0029	IDH1 mutant	1p19q non-codel	Methylated	-0.730196	5.50922	0.00431047	0.0109355	0	0	0.148659	0
TCGA-E1-A7YD-01	2.16286	Internal Validation	High	Cluster1	1	1.19178	57	male	III	NA	0.608161	0.537	-928.546	-269.739	-1198.28	IDH1 wildtype	1p19q non-codel	Unmethylated	-0.741145	5.67884	0.00870067	0.101346	0	0	0.60982	0
TCGA-E1-A7YE-01	2.74143	Internal Validation	High	Cluster1	1	2.4274	32	female	III	NA	0.474433	0.38	-71.9858	1010	938.012	IDH1 mutant	1p19q non-codel	Unmethylated	-0.494187	5.59002	0.00981292	0	0.00563724	0	0.076053	0
TCGA-E1-A7YH-01	1.14831	Internal Validation	Low	Cluster2	1	7.76712	47	female	III	NA	0.468359	0.115	-1074.88	-80.5553	-1155.43	IDH1 mutant	1p19q non-codel	Methylated	-0.681993	5.89968	0.0143496	0	0.0274729	0	0.0527762	0
TCGA-E1-A7YI-01	2.11582	Internal Validation	High	Cluster2	1	0.30411	33	female	III	NA	0.752052	0.334	-1317	-507.758	-1824.76	IDH1 mutant	1p19q non-codel	Methylated	-0.733288	5.3001	0.0195181	0.394409	0.0326482	0	0.295471	7.37796e-19
TCGA-E1-A7YJ-01	3.75471	Internal Validation	High	Cluster1	1	1.62192	55	male	III	NA	0.382615	0.236	-716.158	656.233	-59.9243	IDH1 wildtype	1p19q non-codel	Unmethylated	-0.668154	5.89174	0.0105378	0.0820454	0.060115	0	0.88598	0
TCGA-E1-A7YK-01	2.07358	Internal Validation	Low	Cluster1	1	1.03562	52	male	III	NA	0.32275	0.119	-194.159	1184	989.843	IDH1 mutant	1p19q non-codel	Methylated	-0.619188	5.99301	0.0218307	0.00992668	0.0528166	0	1.94435	5.14729e-18
TCGA-E1-A7YL-01	2.81171	Internal Validation	High	Cluster1	1	1.34795	46	male	III	NA	0.300236	0.347	-161.737	962.995	801.257	IDH1 wildtype	1p19q non-codel	Unmethylated	-0.558383	5.86148	0.0100262	0	0.112136	0	0.91175	1.73471e-19
TCGA-E1-A7YM-01	1.52562	Internal Validation	Low	Cluster2	1	1.77534	63	male	III	NA	0.565689	0.25	-1071.93	-361.734	-1433.66	IDH1 wildtype	1p19q non-codel	Unmethylated	-0.740744	5.95342	0.0214947	0.187946	0	0	0.488337	7.47566e-18
TCGA-E1-A7YN-01	5.08577	Internal Validation	High	Cluster1	1	1.99178	63	female	III	NA	0.34887	0.248	446.639	1981.06	2427.7	IDH1 wildtype	1p19q non-codel	Methylated	-0.554434	5.87091	0.0289882	0.236878	0.0747084	0.00590396	5.778	0
TCGA-E1-A7YO-01	1.60597	Training	Low	Cluster2	1	6.25205	45	male	III	oligodendroglioma	0.576322	0.122	-1220.41	-1028.73	-2249.13	IDH1 mutant	1p19q codel	Methylated	-0.682669	5.6658	0.0229265	0.112125	0.0450838	0	0.476933	0
TCGA-E1-A7YQ-01	3.3807	Internal Validation	High	Cluster1	1	4.32329	58	female	III	NA	0.347481	0.149	256.011	1342.65	1598.66	IDH1 wildtype	1p19q non-codel	Unmethylated	-0.593866	5.7692	0.0093509	0	0.0106166	0	0.685398	1.70021e-18
TCGA-E1-A7YS-01	1.15683	Internal Validation	Low	Cluster2	1	1.27671	71	male	III	NA	0.78681	0.138	-1678.51	-1000.22	-2678.73	IDH1 mutant	1p19q codel	Methylated	-0.733797	5.46879	0.0214833	0.0386963	0.0170591	0	0.0664869	1.83431e-18
TCGA-E1-A7YU-01	1.00918	Internal Validation	Low	Cluster2	1	0.0630137	42	male	III	NA	0.568931	0.16	-1050.33	-378.647	-1428.98	IDH1 mutant	1p19q non-codel	Methylated	-0.665599	5.86763	0.0139096	0	0.0502324	0	0.590462	0
TCGA-E1-A7YV-01	1.43824	Internal Validation	Low	Cluster2	1	2.70411	26	female	III	oligoastrocytoma	0.65198	0.353	-1353.76	-926.036	-2279.8	IDH1 mutant	1p19q non-codel	Methylated	-0.852211	5.58758	0.0181621	0.19782	0.0235262	0	0.216381	1.70982e-18
TCGA-E1-A7YW-01	1.23492	Internal Validation	Low	Cluster2	1	3.06849	28	male	II	oligoastrocytoma	0.469677	0.078	-1009.51	-81.5681	-1091.08	IDH1 mutant	1p19q non-codel	Methylated	-0.703667	5.79708	0.00710266	0.0505911	0	0	0.171119	8.23212e-19
TCGA-E1-A7YY-01	2.10137	Internal Validation	High	Cluster2	1	12.1781	27	female	II	NA	0.749288	0.186	-1002.01	-827.068	-1829.08	IDH1 mutant	1p19q non-codel	Methylated	-0.804432	5.94103	0.0582973	0.150371	0	0	0.545039	1.74558e-18
TCGA-E1-A7Z2-01	1.8181	Internal Validation	Low	Cluster2	1	1.09041	58	female	II	NA	0.573519	0.289	-1144.59	-885.792	-2030.38	IDH1 wildtype	1p19q non-codel	Unmethylated	-0.730576	6.08723	0.020607	0.129559	0	0	0.217967	0
TCGA-E1-A7Z3-01	2.76403	Internal Validation	High	Cluster2	1	6.12329	31	female	II	NA	0.478584	0.126	-675.668	-144.135	-819.803	IDH1 mutant	1p19q non-codel	Methylated	-0.722933	5.87733	0.0197744	0.047702	0	0	0.49354	1.93047e-17
TCGA-E1-A7Z4-01	1.53774	Internal Validation	Low	Cluster2	1	12.0877	35	male	II	NA	0.593342	0.084	-1049.16	350.172	-698.99	IDH1 mutant	1p19q non-codel	Methylated	-0.709538	6.01491	0.00737542	0	0	0	0.308042	0
TCGA-E1-A7Z6-01	1.91158	Internal Validation	Low	Cluster2	1	2.69589	41	female	II	astrocytoma	0.414699	0.081	-916.716	-210.043	-1126.76	IDH1 mutant	1p19q non-codel	Methylated	-0.627219	5.96594	0.0156094	0.0923051	0	0	0.209983	0
TCGA-EZ-7264-01	1.98368	Internal Validation	Low	Cluster2	0	3.29041	47	female	II	oligodendroglioma	0.812813	0.099	-1439.86	-1102.84	-2542.7	IDH1 mutant	1p19q codel	Methylated	-0.818155	5.46245	0.0228283	0.12653	0	0	0.563984	5.88954e-18
TCGA-F6-A8O3-01	1.61042	Training	Low	Cluster2	0	0.0191781	34	male	II	oligodendroglioma	0.833704	0.084	-1569.38	-1141.78	-2711.17	IDH1 mutant	1p19q codel	Methylated	-0.788323	5.43881	0.0189698	0.152197	0.0566244	0	0.443119	0
TCGA-F6-A8O4-01	1.56239	Internal Validation	Low	Cluster2	0	0.0164384	44	male	II	astrocytoma	0.648911	0.129	-1309.33	-906.385	-2215.72	IDH1 mutant	1p19q non-codel	Methylated	-0.604956	5.82447	0.0210491	0.126016	0.0555236	0	0.236215	0
TCGA-FG-5962-01	2.38387	Internal Validation	High	Cluster2	0	3.98082	54	male	III	NA	0.790604	NA	-1060.52	-770.306	-1830.83	NA	NA	NA	-0.717073	5.71803	0.0323908	0.170198	0	0	0.434362	0
TCGA-FG-5963-01	2.51635	Training	High	Cluster1	1	2.12329	23	male	III	astrocytoma	0.52405	0.257	-123.416	1120.25	996.833	IDH1 wildtype	1p19q non-codel	Unmethylated	-0.610025	5.85175	0.000392601	0.163763	0.0654953	0	2.51862	4.46624e-18
TCGA-FG-5964-01	2.29391	Internal Validation	High	Cluster2	0	4.35068	62	male	II	oligodendroglioma	0.735229	0.107	-784.279	372.205	-412.074	IDH1 mutant	1p19q codel	Methylated	-0.733464	5.7605	0.00719602	0.0543735	0.0265796	0	0.347801	0
TCGA-FG-5965-01	2.90976	Internal Validation	High	Cluster2	1	3.06849	39	female	II	NA	0.53471	0.082	-729.23	186.861	-542.369	NA	NA	NA	-0.619859	5.77248	0.00938448	0.215112	0.0248519	0	0.526173	6.08926e-18
TCGA-FG-6688-01	3.23284	Training	High	Cluster1	0	1.56438	59	female	III	astrocytoma	0.466953	0.174	-350.863	739.364	388.501	IDH1 wildtype	1p19q non-codel	Methylated	-0.637803	5.90184	0.0166157	0.322218	0	0	0.296615	0
TCGA-FG-6689-01	1.99418	Internal Validation	Low	Cluster2	0	1.24384	30	male	II	astrocytoma	0.621594	0.125	-782.67	177.118	-605.552	IDH1 mutant	1p19q non-codel	Methylated	-0.722442	5.84175	0.0182386	0.165538	0	0	0.365793	1.34161e-18
TCGA-FG-6690-01	1.69384	Internal Validation	Low	Cluster2	0	3.54521	70	male	II	oligodendroglioma	0.624383	NA	-734.281	256.249	-478.031	IDH1 mutant	1p19q non-codel	Methylated	-0.643234	5.70456	0.0151525	0.0802227	0.0117375	0	0.444005	0
TCGA-FG-6691-01	2.47669	Training	High	Cluster2	0	3.44384	23	female	II	astrocytoma	0.637479	0.101	-324.137	791.49	467.353	IDH1 mutant	1p19q non-codel	Unmethylated	-0.635673	5.58658	0.0196852	0.00885881	0	0	0.458505	3.309e-18
TCGA-FG-6692-01	3.42809	Internal Validation	High	Cluster1	1	1.53699	63	male	III	oligodendroglioma	0.546838	0.383	-661.591	340.878	-320.712	IDH1 wildtype	1p19q non-codel	Methylated	-0.418206	5.79092	0.0123765	0.279173	0.129925	0	1.45319	0
TCGA-FG-7634-01	2.07583	Training	Low	Cluster1	0	1.27945	28	male	II	oligodendroglioma	0.538439	0.111	-60.46	427.792	367.332	IDH1 mutant	1p19q codel	Methylated	-0.537383	5.32313	0.0171593	0.29767	0	0	0.108804	0
TCGA-FG-7636-01	1.2014	Internal Validation	Low	Cluster2	0	1.49041	48	male	III	astrocytoma	0.70265	0.114	-1142.46	-308.413	-1450.87	IDH1 mutant	1p19q non-codel	Methylated	-0.552056	5.79407	0.0107889	0.134716	0.00632111	0	0.409937	0
TCGA-FG-7637-01	1.95378	Internal Validation	Low	Cluster2	0	3.33973	49	male	II	oligoastrocytoma	0.692942	0.059	-1002.02	-689.747	-1691.77	IDH1 mutant	1p19q non-codel	Methylated	-0.685154	5.49129	0.0168251	0.166026	0.0210706	0	0.595563	3.13352e-18
TCGA-FG-7638-01	2.18723	Internal Validation	High	Cluster2	0	1.87945	31	female	III	NA	0.727512	0.077	-1057.04	-638.741	-1695.78	NA	NA	NA	-0.735159	5.72876	0.0173834	0.134992	0.0303296	0	0.55503	0
TCGA-FG-7641-01	1.63224	Internal Validation	Low	Cluster2	0	1.71781	31	male	II	NA	0.730722	0.082	-1539.38	-1352.86	-2892.25	NA	NA	NA	-0.776891	5.70206	0.026718	0.205263	0.0081364	0	0.103139	0
TCGA-FG-7643-01	2.45327	Internal Validation	High	Cluster2	0	1.67397	49	female	II	oligoastrocytoma	0.637999	0.193	-774.586	-643.157	-1417.74	IDH1 wildtype	1p19q non-codel	Methylated	-0.739148	5.91312	0.0451308	0.272919	0.034033	0	0.655366	0
TCGA-FG-8181-01	2.16479	Training	High	Cluster2	0	2.36164	23	male	III	oligoastrocytoma	0.705531	0.178	-855.037	-911.89	-1766.93	IDH1 wildtype	1p19q non-codel	Unmethylated	-0.774293	5.90024	0.0693268	0.195551	0.0588237	0	0.780139	0
TCGA-FG-8182-01	0.858173	Internal Validation	Low	Cluster2	0	1.13973	35	male	II	oligodendroglioma	0.568379	0.1	-803.592	203.827	-599.764	IDH1 mutant	1p19q non-codel	Methylated	-0.675388	5.61328	0.0141367	0.0651266	0	0	0.391456	9.18926e-19
TCGA-FG-8185-01	1.38271	Internal Validation	Low	Cluster2	0	1.1863	37	male	III	astrocytoma	0.561332	0.053	-1180.21	-437.149	-1617.36	IDH1 mutant	1p19q non-codel	Methylated	-0.725371	5.78393	0.00854663	0.121491	0	0	0.21277	0
TCGA-FG-8186-01	2.53214	Training	High	Cluster2	0	1.33425	42	female	III	oligoastrocytoma	0.59925	0.083	-668.184	358.426	-309.758	IDH1 mutant	1p19q codel	Methylated	-0.58809	5.70664	0.00801162	0.0085932	0	0	0.472609	0
TCGA-FG-8187-01	1.52727	Internal Validation	Low	Cluster2	0	1.67397	31	male	II	oligoastrocytoma	0.554807	0.133	-870.582	-348.827	-1219.41	IDH1 mutant	1p19q codel	Methylated	-0.689747	5.83096	0.0151524	0.17521	0.00283725	0	0.859996	0
TCGA-FG-8188-01	1.61706	Internal Validation	Low	Cluster2	0	1.24658	41	male	II	oligoastrocytoma	0.517515	0.144	-742.697	-125.591	-868.288	IDH1 mutant	1p19q non-codel	Methylated	-0.565074	5.8189	0.0103985	0.159066	0	0	0.289846	4.39416e-18
TCGA-FG-8189-01	1.64443	Internal Validation	Low	Cluster2	0	1.87671	33	female	II	NA	0.812091	0.225	-1341.06	-1435.96	-2777.03	NA	NA	NA	-0.867729	5.91581	0.0758043	0.192699	0	0	0.148059	1.92118e-18
TCGA-FG-8191-01	2.26355	Internal Validation	High	Cluster2	0	2.71781	30	male	III	oligodendroglioma	0.451999	0.101	-611.202	216.866	-394.336	IDH1 mutant	1p19q non-codel	Unmethylated	-0.713	5.71447	0.0131138	0.23055	0	0	0.352177	1.32846e-18
TCGA-FG-A4MT-01	0.324657	Internal Validation	Low	Cluster2	0	3.18904	27	female	II	oligodendroglioma	0.726976	0.081	-1203.92	-466.672	-1670.59	IDH1 mutant	1p19q non-codel	Methylated	-0.658266	5.83219	0.00605299	0	0.0039166	0	0.190306	3.80678e-18
TCGA-FG-A4MU-01	2.81704	Internal Validation	High	Cluster1	0	0.893151	58	male	III	NA	0.351834	0.408	-161.015	744.468	583.453	NA	NA	NA	-0.526619	5.59278	0.0064069	0.206603	0.0155947	0	0.280252	0
TCGA-FG-A4MW-01	1.98546	Internal Validation	Low	Cluster1	1	1.53151	63	male	III	oligoastrocytoma	0.538972	0.319	-846.897	-346.277	-1193.17	IDH1 wildtype	1p19q non-codel	Methylated	-0.680778	5.9559	0.0133359	0.147721	0.0180366	0	0.376729	0
TCGA-FG-A4MX-01	0.502699	Training	Low	Cluster2	0	1.5589	47	male	II	astrocytoma	0.479368	0.092	-1250.25	-277.745	-1527.99	IDH1 mutant	1p19q non-codel	Methylated	-0.473685	6.00053	0.00821473	0.0351069	0.00723565	0	0.214148	1.85239e-18
TCGA-FG-A4MY-01	1.69185	Training	Low	Cluster2	0	1.97534	44	female	II	oligoastrocytoma	0.450933	0.136	-1026.1	-334.644	-1360.74	IDH1 mutant	1p19q non-codel	Methylated	-0.600836	5.97134	0.00908364	0.185393	0.0260728	0	0.391167	1.66471e-18
TCGA-FG-A60J-01	1.24896	Training	Low	Cluster2	0	1.23014	47	female	II	oligoastrocytoma	0.55097	0.093	-770.591	-36.8604	-807.451	IDH1 mutant	1p19q non-codel	Methylated	-0.723989	5.90826	0.016427	0.110529	0.0120227	0	0.496894	3.71408e-18
TCGA-FG-A60K-01	0.976739	Training	Low	Cluster2	0	1.48493	34	female	II	oligoastrocytoma	0.641072	0.079	-1273.38	-394.378	-1667.75	IDH1 mutant	1p19q codel	Methylated	-0.706289	5.5932	0.00976919	0.0359559	0	0	0.410697	0
TCGA-FG-A60L-01	1.46689	Internal Validation	Low	Cluster2	0	1.79452	34	female	II	astrocytoma	0.592495	0.101	-611.186	564.336	-46.8497	IDH1 mutant	1p19q non-codel	Methylated	-0.73245	6.06294	1.87561e-06	0	0.00818453	0	0.318466	0
TCGA-FG-A6IZ-01	1.66016	Internal Validation	Low	Cluster2	0	1.25205	60	male	II	oligodendroglioma	0.900185	0.087	-1256.87	-257.237	-1514.1	IDH1 mutant	1p19q codel	Methylated	-0.782508	5.85445	0.00617324	0	0.0190495	0	0.225891	0
TCGA-FG-A6J1-01	1.18776	Internal Validation	Low	Cluster2	0	1.36986	44	female	II	oligodendroglioma	0.762214	0.093	-855.405	53.9749	-801.43	IDH1 mutant	1p19q codel	Methylated	-0.770273	5.90036	0.00557623	0	0.0431775	0	0.348757	0
TCGA-FG-A6J3-01	2.19126	Training	High	Cluster1	0	1.85479	52	female	III	astrocytoma	0.486897	0.251	-78.6259	1160.1	1081.48	IDH1 mutant	1p19q non-codel	Methylated	-0.621327	5.96044	5.59038e-08	0.120929	0.0895902	0.000377591	1.51453	0
TCGA-FG-A70Y-01	1.65602	Training	Low	Cluster2	0	2.37808	20	female	II	oligodendroglioma	0.506769	0.137	-671.335	308.209	-363.126	IDH1 mutant	1p19q non-codel	Methylated	-0.791318	5.94768	0.0123969	0	0.0242252	0	0.398469	0
TCGA-FG-A70Z-01	2.68086	Internal Validation	High	Cluster1	0	0.89863	53	female	III	oligoastrocytoma	0.553969	NA	7.03261	473.808	480.841	IDH1 wildtype	1p19q non-codel	Methylated	-0.592316	5.77476	0.00933315	0.125192	0.000663495	0	0.281721	3.88219e-20
TCGA-FG-A710-01	2.01686	Internal Validation	Low	Cluster1	0	3.05479	50	female	II	oligodendroglioma	0.685568	0.172	-602.075	626.503	24.4271	IDH1 mutant	1p19q codel	Methylated	-0.663016	5.63421	0.00521354	0.0400793	0	0	0.752224	8.33933e-19
TCGA-FG-A711-01	1.09806	Internal Validation	Low	Cluster2	1	4.05753	33	female	II	oligodendroglioma	0.699413	0.264	-1364.87	-472.204	-1837.08	IDH1 mutant	1p19q non-codel	Unmethylated	-0.739823	5.86084	0.0160664	0.0823876	0	0	0.0558962	0
TCGA-FG-A713-01	1.68189	Training	Low	Cluster2	0	1.70411	74	female	II	oligoastrocytoma	0.668712	0.122	-1092.42	-1134.48	-2226.9	IDH1 mutant	1p19q codel	Methylated	-0.767804	5.99017	0.0420271	0.191656	0	0	0.592053	3.6921e-18
TCGA-FG-A87N-01	1.34274	Internal Validation	Low	Cluster2	0	1.55342	37	female	III	astrocytoma	0.662285	0.191	-1225.69	-468.126	-1693.81	IDH1 mutant	1p19q non-codel	Methylated	-0.697497	5.45466	0.0200095	0.24184	0.217676	0	0.269667	4.66925e-19
TCGA-FG-A87Q-01	2.36904	Internal Validation	High	Cluster1	0	0.476712	61	female	III	astrocytoma	0.425915	0.239	26.0327	916.131	942.164	IDH1 wildtype	1p19q non-codel	Methylated	-0.603268	5.92897	0.0138302	0	0.0513868	0	0.722796	1.18132e-18
TCGA-FN-7833-01	3.24505	Internal Validation	High	Cluster1	0	2.29315	25	male	III	oligoastrocytoma	0.584017	0.089	-56.5413	1167.27	1110.73	IDH1 mutant	1p19q non-codel	Methylated	-0.747704	5.78463	6.89172e-08	0	0	0	0.168681	0
TCGA-HT-7467-01	1.9994	Internal Validation	Low	Cluster2	0	0.00821918	54	male	II	oligodendroglioma	0.67331	0.128	-978.373	-735.609	-1713.98	IDH1 mutant	1p19q codel	Methylated	-0.78187	5.81653	0.0340483	0.261711	0.0454495	0	1.18971	0
TCGA-HT-7468-01	2.11645	Internal Validation	High	Cluster2	0	0.556164	30	male	III	oligodendroglioma	0.765762	0.071	-1107.14	-572.845	-1679.99	IDH1 mutant	1p19q codel	Methylated	-0.650178	5.48407	0.0185942	0.191648	0.0401816	0	0.837435	4.47179e-18
TCGA-HT-7469-01	1.45007	Internal Validation	Low	Cluster2	1	0.961644	30	male	III	oligodendroglioma	0.558042	0.377	-1121.74	-529.769	-1651.51	IDH1 wildtype	1p19q non-codel	Methylated	-0.764972	5.52015	0.0141389	0.411657	0.0384837	0	0.235117	0
TCGA-HT-7470-01	2.42308	Training	High	Cluster2	1	3.34247	37	male	III	oligodendroglioma	0.653517	0.139	-851.419	-521.106	-1372.53	IDH1 mutant	1p19q non-codel	Methylated	-0.661836	5.80749	0.0317361	0.269587	0	0	0.334195	0
TCGA-HT-7471-01	3.41261	Internal Validation	High	Cluster1	0	0.0109589	37	female	III	oligodendroglioma	0.788143	0.047	-497.763	331.825	-165.938	IDH1 mutant	1p19q codel	Methylated	-0.748443	5.48512	0.0172214	0.145848	0.0350491	0	0.78141	0
TCGA-HT-7472-01	2.30348	Training	High	Cluster2	0	0.00273973	38	male	II	oligodendroglioma	0.631852	0.059	-453.96	459.078	5.11814	IDH1 mutant	1p19q non-codel	Methylated	-0.640336	5.64849	0.0229797	0.279953	0.0335106	0	0.484126	0
TCGA-HT-7473-01	2.95669	Internal Validation	High	Cluster1	0	1.37808	28	male	II	oligoastrocytoma	0.456111	0.114	-90.5615	1206.79	1116.23	IDH1 mutant	1p19q non-codel	Unmethylated	-0.563745	5.67688	0.0290799	0.194838	0	0	0.916256	2.23369e-19
TCGA-HT-7474-01	2.3447	Internal Validation	High	Cluster2	0	0.312329	52	male	II	oligoastrocytoma	0.677757	0.101	-1039.98	-751.127	-1791.11	IDH1 mutant	1p19q non-codel	Methylated	-0.697329	5.90513	0.0359893	0.272235	0	0	0.504298	6.93682e-18
TCGA-HT-7475-01	1.66878	Training	Low	Cluster2	0	1.45205	67	male	III	oligoastrocytoma	0.820399	0.107	-1435.15	-1020.65	-2455.79	IDH1 mutant	1p19q non-codel	Methylated	-0.730913	5.77249	0.0223547	0.178898	0.0511575	0	0.625737	1.35801e-18
TCGA-HT-7476-01	2.60763	Internal Validation	High	Cluster2	0	0.545205	26	male	II	astrocytoma	0.582104	0.111	-330.067	-363.054	-693.121	IDH1 mutant	1p19q non-codel	Methylated	-0.762447	5.77614	0.0248181	0.158352	0.0432689	0	0.656925	0
TCGA-HT-7477-01	1.57705	Internal Validation	Low	Cluster2	0	2.02192	62	male	III	NA	0.787665	0.175	-940.531	-454.092	-1394.62	NA	NA	NA	-0.659865	5.6456	0.0123034	0.179078	0.000525399	0	0.289078	2.70289e-18
TCGA-HT-7478-01	3.63295	Training	High	Cluster1	0	0.531507	36	male	II	astrocytoma	0.567224	0.057	-3.57334	1391.25	1387.67	IDH1 mutant	1p19q non-codel	Unmethylated	-0.630124	5.61088	0.0155285	0.243746	0.0280563	0	1.64541	0
TCGA-HT-7479-01	2.21156	Internal Validation	High	Cluster2	0	3.36164	44	male	III	astrocytoma	0.524288	0.073	-360.82	346.664	-14.1559	IDH1 mutant	1p19q non-codel	Methylated	-0.593803	5.81041	0.0112627	0.309109	0	0	1.10871	0
TCGA-HT-7480-01	1.41818	Training	Low	Cluster2	0	6.26575	33	male	II	oligodendroglioma	0.68247	0.059	-1240.31	-943.135	-2183.45	IDH1 mutant	1p19q codel	Methylated	-0.700941	5.5798	0.0230223	0.149609	0.00705944	0	0.377724	0
TCGA-HT-7481-01	1.69876	Internal Validation	Low	Cluster2	0	7.99452	39	male	II	oligodendroglioma	0.758126	0.125	-1139.9	-876.469	-2016.37	IDH1 mutant	1p19q codel	Methylated	-0.67692	5.70866	0.023819	0.236134	0.0287563	0	0.510774	0
TCGA-HT-7482-01	2.28458	Internal Validation	High	Cluster2	0	8.91233	18	female	II	oligoastrocytoma	0.553821	0.069	-465.873	363.95	-101.922	IDH1 mutant	1p19q non-codel	Methylated	-0.642655	5.69746	0.00387703	0.346833	0	0	0.338744	2.68736e-18
TCGA-HT-7483-01	2.35891	Training	High	Cluster2	0	14.3973	14	male	II	oligoastrocytoma	0.600772	0.089	-661.228	-498.741	-1159.97	IDH1 mutant	1p19q non-codel	Unmethylated	-0.749631	5.61456	0.0140395	0.283519	0.0117207	0	0.604922	4.6731e-18
TCGA-HT-7485-01	2.46004	Internal Validation	High	Cluster2	0	0.334247	42	male	II	astrocytoma	0.661455	0.108	-804.56	-134.17	-938.73	IDH1 mutant	1p19q non-codel	Methylated	-0.599792	5.82774	0.0114318	0.228699	0	0	0.332555	5.67018e-18
TCGA-HT-7601-01	3.62506	Internal Validation	High	Cluster1	0	0.419178	30	female	III	astrocytoma	0.563383	0.122	119.057	1325.65	1444.71	IDH1 mutant	1p19q non-codel	Methylated	-0.73908	5.6728	0.0212499	0.316042	0.0283527	0	1.19924	3.48372e-18
TCGA-HT-7602-01	2.04703	Internal Validation	Low	Cluster2	0	2.48767	21	male	II	oligodendroglioma	0.526223	0.1	-742.088	40.4901	-701.598	IDH1 mutant	1p19q non-codel	Methylated	-0.618752	5.97339	0.0117522	0.269252	0	0	0.27333	9.51438e-18
TCGA-HT-7603-01	1.96438	Internal Validation	Low	Cluster2	0	1.93151	29	male	II	oligodendroglioma	0.821334	0.116	-1235.8	-933.632	-2169.43	IDH1 mutant	1p19q non-codel	Methylated	-0.773164	5.80053	0.0564579	0.253494	0.0655778	0	0.134055	2.10124e-18
TCGA-HT-7604-01	2.14568	Training	High	Cluster2	0	10.2055	50	male	II	astrocytoma	0.713346	0.12	-1003.05	-521.075	-1524.13	IDH1 mutant	1p19q non-codel	Methylated	-0.548054	5.51316	0.0123401	0.15261	0	0	0.212151	0
TCGA-HT-7605-01	2.07954	Internal Validation	Low	Cluster2	0	0.380822	38	male	II	oligodendroglioma	0.697433	0.105	-997.314	-775.979	-1773.29	IDH1 mutant	1p19q codel	Methylated	-0.761599	5.79892	0.0272536	0.247417	0.0437989	0	0.739046	0
TCGA-HT-7606-01	0.85779	Internal Validation	Low	Cluster2	0	1.4411	30	female	II	astrocytoma	0.857045	0.236	-1246.52	-535.885	-1782.41	IDH1 mutant	1p19q non-codel	Unmethylated	-0.779182	5.57931	0.0119626	0.199017	0	0	0.17504	0
TCGA-HT-7607-01	2.92626	Internal Validation	High	Cluster2	1	0.263014	61	female	II	astrocytoma	0.685954	0.146	-852.85	-636.605	-1489.46	IDH1 mutant	1p19q codel	Methylated	-0.775449	5.83274	0.0515914	0.214855	0	0	0.516334	0
TCGA-HT-7608-01	2.55105	Training	High	Cluster2	0	1.83836	61	male	II	oligoastrocytoma	0.611486	0.12	-757.989	-225.847	-983.837	IDH1 mutant	1p19q codel	Methylated	-0.638608	5.92824	0.0112127	0.102725	0	0	0.674381	7.82868e-18
TCGA-HT-7609-01	1.91993	Training	Low	Cluster2	0	3.83288	34	male	III	oligoastrocytoma	0.556423	0.07	-839.331	141.261	-698.07	IDH1 mutant	1p19q non-codel	Methylated	-0.676826	5.6917	0.0099976	0.112948	0	0	0.103423	0
TCGA-HT-7610-01	1.48533	Internal Validation	Low	Cluster2	0	4.67397	25	female	II	oligoastrocytoma	0.719696	0.077	-1082.4	-852.828	-1935.23	IDH1 mutant	1p19q non-codel	Methylated	-0.809415	5.68926	0.0440878	0.192518	0.00474668	0	0.264409	0
TCGA-HT-7611-01	2.39093	Internal Validation	High	Cluster2	0	4.8	36	male	II	oligoastrocytoma	0.478569	0.067	-625.954	110.382	-515.573	IDH1 mutant	1p19q non-codel	Methylated	-0.642989	5.70621	0.0082049	0.241334	0.00795107	0	0.799568	8.03223e-19
TCGA-HT-7616-01	4.7735	Training	High	Cluster1	1	0.0191781	75	male	III	oligodendroglioma	0.571537	0.157	-183.042	865.905	682.863	IDH1 mutant	1p19q codel	Methylated	-0.706509	5.38339	0.0200623	0.159175	0.0504365	0.0036362	2.34277	0
TCGA-HT-7620-01	1.71044	Internal Validation	Low	Cluster2	0	1.18904	40	male	III	oligodendroglioma	0.600432	NA	-1068.51	-269.453	-1337.96	IDH1 mutant	1p19q codel	Methylated	-0.686383	5.78501	0.019371	0.289221	0	0	0.668222	1.33525e-17
TCGA-HT-7676-01	1.83815	Training	Low	Cluster2	0	0.0136986	26	male	II	oligodendroglioma	0.689504	0.106	-712.404	588.169	-124.235	IDH1 mutant	1p19q non-codel	Unmethylated	-0.646632	5.71019	2.11074e-05	0.00309477	0.00159015	0	0.557674	2.92631e-18
TCGA-HT-7677-01	1.96441	Internal Validation	Low	Cluster2	0	1.35342	53	male	III	oligodendroglioma	0.632815	0.069	-1089.83	-697.185	-1787.01	IDH1 mutant	1p19q codel	Methylated	-0.785527	5.5681	0.0146013	0.186189	0.0596952	0	0.837855	0
TCGA-HT-7680-01	3.06525	Internal Validation	High	Cluster2	0	0.0630137	32	female	II	astrocytoma	0.422802	0.21	-201.585	596.474	394.89	IDH1 wildtype	1p19q non-codel	Unmethylated	-0.600712	5.94629	0.0128112	0.224407	0	0	0.733121	0
TCGA-HT-7681-01	2.34408	Training	High	Cluster2	0	3.72329	29	female	II	oligoastrocytoma	0.684554	0.087	-888.595	-328.099	-1216.69	IDH1 mutant	1p19q codel	Methylated	-0.695693	5.82471	0.0290559	0.198009	0.0675337	0	1.93932	0
TCGA-HT-7684-01	2.40498	Internal Validation	High	Cluster2	0	0.50411	58	male	III	oligoastrocytoma	0.575955	0.116	-592.894	397.752	-195.142	IDH1 mutant	1p19q non-codel	Methylated	-0.633999	5.99765	1.93291e-06	0.237185	0	0	0.142854	3.07471e-19
TCGA-HT-7686-01	2.42794	Internal Validation	High	Cluster1	0	3.56164	29	female	III	astrocytoma	0.497123	0.144	-243.009	1193.09	950.08	IDH1 mutant	1p19q non-codel	Methylated	-0.613127	5.7103	6.7791e-06	0.127869	0.0351075	0	0.682388	0
TCGA-HT-7687-01	2.00172	Internal Validation	Low	Cluster2	0	0.00821918	74	male	III	oligodendroglioma	0.683609	0.071	-956.578	-346.527	-1303.11	IDH1 mutant	1p19q codel	Methylated	-0.699824	5.58493	0.0306649	0.129204	0.0255004	0	1.05374	0
TCGA-HT-7688-01	1.97526	Training	Low	Cluster2	0	2.6411	59	male	III	oligodendroglioma	0.789442	0.133	-1247.61	-1019.52	-2267.13	IDH1 mutant	1p19q non-codel	Methylated	-0.77042	5.79026	0.0527019	0.224593	0.0431863	0	0.558993	0
TCGA-HT-7689-01	2.00512	Training	Low	Cluster2	0	1.24658	58	female	II	oligodendroglioma	0.619987	0.19	-881.778	-69.0264	-950.804	IDH1 mutant	1p19q non-codel	Methylated	-0.620023	5.81153	0.0101279	0.19545	0	0	0.390634	4.37021e-18
TCGA-HT-7690-01	3.11435	Internal Validation	High	Cluster1	0	0.00821918	29	male	III	oligoastrocytoma	0.55635	0.1	-185.535	703.556	518.021	IDH1 mutant	1p19q non-codel	Methylated	-0.552715	5.73541	0.0198519	0.158035	0.0344192	0	0.898617	5.10647e-18
TCGA-HT-7691-01	2.96807	Internal Validation	High	Cluster2	0	0.00821918	31	female	II	astrocytoma	0.439516	0.214	-63.5162	638.981	575.465	IDH1 wildtype	1p19q non-codel	Unmethylated	-0.741366	5.86629	0.00564562	0.170519	0	0	0.569192	5.96884e-18
TCGA-HT-7692-01	0.991405	Internal Validation	Low	Cluster2	0	0.246575	43	male	II	oligoastrocytoma	0.699918	0.128	-1196.09	-462.182	-1658.27	IDH1 mutant	1p19q codel	Methylated	-0.690309	5.68619	0.0105284	0.041483	0.0222059	0	0.260793	1.76535e-18
TCGA-HT-7693-01	1.73096	Internal Validation	Low	Cluster2	0	1.46027	51	female	II	oligodendroglioma	0.514599	0.07	-726.822	526.682	-200.14	IDH1 mutant	1p19q non-codel	Methylated	-0.622449	5.53755	0.00844877	0.0816586	0.00413979	0	0.203007	0
TCGA-HT-7694-01	1.85826	Training	Low	Cluster2	0	0.575342	60	male	III	oligodendroglioma	0.732131	0.106	-1311.49	-1122.01	-2433.5	IDH1 mutant	1p19q codel	Methylated	-0.771741	5.8779	0.0458195	0.231438	0.0358304	0	0.552176	4.26484e-18
TCGA-HT-7695-01	1.91005	Internal Validation	Low	Cluster2	0	1.21096	29	female	II	oligodendroglioma	0.778173	0.108	-1154.13	-1019.97	-2174.1	IDH1 mutant	1p19q codel	Methylated	-0.690841	5.65634	0.0343023	0.215142	0.0238467	0	0.338428	7.0832e-18
TCGA-HT-7854-01	3.26291	Internal Validation	High	Cluster1	0	3.29041	62	male	II	astrocytoma	0.381343	0.13	-231.539	684.174	452.635	IDH1 wildtype	1p19q non-codel	Unmethylated	-0.603289	5.91294	0.0191974	0.184746	0	0	0.66906	0
TCGA-HT-7855-01	1.54979	Internal Validation	Low	Cluster2	0	1.60274	39	male	III	astrocytoma	0.620785	0.063	-1088.36	-299.98	-1388.34	IDH1 mutant	1p19q non-codel	Methylated	-0.719292	5.69906	0.0143791	0.169979	0.0221868	0	0.970817	0
TCGA-HT-7856-01	1.69444	Training	Low	Cluster2	0	3.25753	35	male	III	oligodendroglioma	0.636932	0.147	-1118.2	-986.75	-2104.95	IDH1 mutant	1p19q codel	Methylated	-0.758283	5.94214	0.0472093	0.147663	0	0	0.509074	0
TCGA-HT-7857-01	3.37895	Training	High	Cluster1	0	0.0191781	24	female	III	astrocytoma	0.264932	0.161	985.649	2106.82	3092.47	IDH1 wildtype	1p19q non-codel	Unmethylated	-0.627461	5.54157	0.0189167	0	0.0333704	0.00657924	3.01508	8.66135e-18
TCGA-HT-7858-01	1.92415	Training	Low	Cluster2	0	4.21918	28	male	II	astrocytoma	0.588282	0.08	-602.675	745.912	143.237	IDH1 mutant	1p19q non-codel	Methylated	-0.649989	5.66757	0.0135209	0.262973	0	0	1.0261	1.16203e-18
TCGA-HT-7860-01	3.29049	Training	High	Cluster1	0	0.0410959	60	female	III	astrocytoma	0.470494	0.237	-352.777	604.234	251.458	IDH1 wildtype	1p19q non-codel	Methylated	-0.583925	5.72331	0.0212491	0.167619	0	0	0.516918	3.73034e-19
TCGA-HT-7873-01	0.881029	Internal Validation	Low	Cluster2	0	1.96712	29	male	II	NA	0.467223	0.13	-899.873	-203.799	-1103.67	NA	NA	NA	-0.606604	5.78387	0.00999243	0.0998332	0	0	0.10835	4.16911e-19
TCGA-HT-7874-01	2.18853	Internal Validation	High	Cluster2	0	3.09589	41	female	III	oligodendroglioma	0.707333	0.138	-1134.89	-1001.54	-2136.43	IDH1 mutant	1p19q codel	Methylated	-0.764413	5.85006	0.0478693	0.215613	0	0	0.785116	4.04364e-18
TCGA-HT-7875-01	1.62189	Internal Validation	Low	Cluster2	0	0.0273973	56	male	II	oligodendroglioma	0.701459	0.114	-1310.61	-1133.28	-2443.89	IDH1 mutant	1p19q codel	Methylated	-0.657033	5.71354	0.0188381	0.179217	0	0	0.357741	0
TCGA-HT-7877-01	1.78265	Internal Validation	Low	Cluster2	0	0.0109589	20	female	II	oligodendroglioma	0.610747	0.104	-1192.85	-824.201	-2017.06	IDH1 mutant	1p19q codel	Methylated	-0.789223	5.6849	0.0219969	0.186574	0.0280191	0	0.500399	2.49342e-18
TCGA-HT-7879-01	0.861991	Training	Low	Cluster2	0	0.306849	31	male	III	oligoastrocytoma	0.44131	0.094	-732.982	-93.8664	-826.849	IDH1 mutant	1p19q non-codel	Methylated	-0.654143	5.82282	0.0131405	0.0452904	0	0	0.0771187	5.67675e-18
TCGA-HT-7880-01	1.58781	Training	Low	Cluster2	0	0.443836	30	male	II	oligoastrocytoma	0.611989	0.153	-1003.9	-627.812	-1631.72	IDH1 mutant	1p19q non-codel	Methylated	-0.74164	6.05192	0.0371169	0.139834	0.0765468	0	0.713706	9.99657e-18
TCGA-HT-7881-01	1.81809	Internal Validation	Low	Cluster2	0	2.95616	38	male	II	oligodendroglioma	0.661113	0.134	-1376.54	-1204.59	-2581.14	IDH1 mutant	1p19q codel	Methylated	-0.748702	5.92954	0.0438578	0.350517	0.0226478	0	0.28902	0
TCGA-HT-7882-01	5.29767	Internal Validation	High	Cluster1	1	0.309589	66	male	III	oligodendroglioma	0	0.194	1698.75	2018.64	3717.38	IDH1 wildtype	1p19q non-codel	Methylated	-0.37207	5.35147	0.000211002	0.291569	0.0448933	0.0119437	5.30591	8.98105e-19
TCGA-HT-7884-01	0.751935	Internal Validation	Low	Cluster2	0	0.939726	44	female	II	NA	0.491191	0.048	-1237.91	-834.297	-2072.21	NA	NA	NA	-0.596071	5.89233	0.0140606	0.190437	0.0315444	0	0.311746	0
TCGA-HT-7902-01	2.19033	Training	High	Cluster2	0	2.61918	30	female	II	oligoastrocytoma	0.505323	0.182	-1040.69	-396.962	-1437.65	IDH1 mutant	1p19q non-codel	Methylated	-0.762944	5.96005	0.0248234	0.385334	0.0903374	0	0.813701	1.86275e-17
TCGA-HT-8010-01	1.76148	Training	Low	Cluster2	0	0.136986	64	female	II	oligodendroglioma	0.552446	0.123	-820.273	-508.956	-1329.23	IDH1 mutant	1p19q codel	Methylated	-0.738373	5.99558	0.0304301	0.141385	0.0324539	0	0.766355	4.50985e-18
TCGA-HT-8011-01	2.1405	Internal Validation	High	Cluster2	0	1.35342	55	male	III	astrocytoma	0.786293	0.411	-1084.75	-475.893	-1560.64	IDH1 wildtype	1p19q non-codel	Unmethylated	-0.783868	5.41515	0.00708105	0.274267	0.0411719	0	0.635403	8.48218e-19
TCGA-HT-8012-01	1.07886	Training	Low	Cluster2	0	0.783562	30	female	II	oligodendroglioma	0.585745	0.034	-1176.06	-626.973	-1803.04	IDH1 mutant	1p19q codel	Methylated	-0.697427	5.71331	0.0156641	0.0270777	0	0	0.636667	0
TCGA-HT-8013-01	1.9489	Internal Validation	Low	Cluster1	1	5.29589	37	female	II	oligoastrocytoma	0.568429	0.132	-469.228	1127.26	658.035	IDH1 mutant	1p19q non-codel	Methylated	-0.550124	5.62533	5.86208e-08	0	0	0	0.414101	0
TCGA-HT-8015-01	2.21885	Internal Validation	High	Cluster2	0	0.00821918	21	male	II	NA	0.608251	0.223	-566.326	-98.8623	-665.189	NA	NA	NA	-0.74092	5.88691	0.0365631	0.155534	0.00825699	0	0.660524	5.04629e-19
TCGA-HT-8018-01	3.00963	Training	High	Cluster1	1	3.15616	40	female	II	oligoastrocytoma	0.437818	0.157	205.448	483.338	688.786	IDH1 mutant	1p19q non-codel	Methylated	-0.693332	5.82251	0.0345475	0.134572	0.0319561	0	1.56586	3.68927e-18
TCGA-HT-8019-01	1.22638	Internal Validation	Low	Cluster2	0	2.75068	34	female	III	oligodendroglioma	0.753363	0.211	-1156.96	-1278.05	-2435	IDH1 wildtype	1p19q non-codel	Unmethylated	-0.785292	6.06149	0.0581546	0.149297	0.0760028	0	0.632014	1.25906e-18
TCGA-HT-8104-01	2.76993	Training	High	Cluster1	0	1.01918	51	female	III	astrocytoma	0.619435	0.314	-587.552	-269.143	-856.695	IDH1 wildtype	1p19q non-codel	Unmethylated	-0.670732	5.71799	0.0186928	0.418598	0	0	0.752727	0
TCGA-HT-8105-01	2.35625	Internal Validation	High	Cluster2	0	0.520548	54	male	III	oligodendroglioma	0.623559	0.048	-1186.92	-534.575	-1721.49	IDH1 mutant	1p19q codel	Methylated	-0.793868	5.53228	0.0264458	0.181351	0.0044184	0	0.540061	0
TCGA-HT-8107-01	1.89367	Training	Low	Cluster2	0	0.0383562	62	male	II	oligodendroglioma	0.722883	0.226	-987.197	-1078.9	-2066.09	IDH1 wildtype	1p19q non-codel	Methylated	-0.768214	5.9105	0.0673745	0.232582	0.0143262	0	0.548005	1.54171e-18
TCGA-HT-8108-01	1.13016	Training	Low	Cluster2	0	0.208219	26	female	II	oligodendroglioma	0.681401	0.131	-797.085	542.435	-254.65	IDH1 mutant	1p19q non-codel	Methylated	-0.781766	5.69862	0.0221211	0.147012	0	0	0.320592	1.69145e-18
TCGA-HT-8109-01	2.32082	Internal Validation	High	Cluster2	0	0.463014	64	male	III	oligodendroglioma	0.707942	0.103	-969.053	-523.802	-1492.86	IDH1 mutant	1p19q codel	Methylated	-0.719461	5.67886	0.0361004	0.239817	0	0	0.409423	0
TCGA-HT-8110-01	3.04399	Training	High	Cluster1	0	1.14795	57	male	III	astrocytoma	0.582401	0.325	-95.0057	1442.16	1347.15	IDH1 wildtype	1p19q non-codel	Methylated	-0.666249	5.73247	0.0127303	0.0563703	0	0	0.830512	7.25044e-18
TCGA-HT-8111-01	2.08492	Training	Low	Cluster2	0	0.0191781	32	male	III	oligoastrocytoma	0.542441	0.092	-694.141	416.707	-277.433	IDH1 mutant	1p19q non-codel	Methylated	-0.584513	5.84973	0.0179225	0.176051	0.0412747	0	0.648379	2.66281e-18
TCGA-HT-8113-01	1.87941	Internal Validation	Low	Cluster2	0	2.46575	49	female	II	oligodendroglioma	0.752967	0.152	-1336.89	-1115.16	-2452.05	IDH1 mutant	1p19q non-codel	Methylated	-0.820023	5.91869	0.0600501	0.222216	0.0518907	0	0.412401	0
TCGA-HT-8114-01	2.37509	Internal Validation	High	Cluster1	0	2.84932	36	male	III	oligoastrocytoma	0.400441	0.101	-132.636	792.12	659.484	IDH1 mutant	1p19q non-codel	Methylated	-0.633936	5.70973	0.0237015	0.128171	0.030961	0	0.988171	0
TCGA-HT-8558-01	1.82959	Internal Validation	Low	Cluster2	0	1.14521	29	female	II	oligodendroglioma	0.790235	0.169	-1215.08	-1265.1	-2480.18	IDH1 wildtype	1p19q non-codel	Unmethylated	-0.769287	5.92005	0.0694389	0.347019	0	0	0.35947	0
TCGA-HT-8563-01	3.97395	Training	High	Cluster1	0	2.35616	30	female	III	astrocytoma	0.303043	0.152	713.608	2129.99	2843.59	IDH1 mutant	1p19q non-codel	Unmethylated	-0.568349	5.59015	0.0181895	0	0.0475828	0.000122997	2.60313	0.00530312
TCGA-HT-8564-01	1.5437	Training	Low	Cluster1	0	1.30959	47	male	III	astrocytoma	0.560754	0.305	-692.241	-251.423	-943.664	IDH1 wildtype	1p19q non-codel	Unmethylated	-0.627665	5.93549	0.0275194	0.287671	0.0639922	0	1.74109	0
TCGA-HT-A4DS-01	2.12566	Training	High	Cluster1	0	0.0191781	55	female	III	astrocytoma	0.760032	0.309	-716.838	787.158	70.3198	IDH1 wildtype	1p19q non-codel	Unmethylated	-0.645987	6.23975	6.51051e-05	0	0.032369	0	1.03014	0
TCGA-HT-A4DV-01	1.21358	Training	Low	Cluster2	0	2.16986	51	female	III	oligodendroglioma	0.655907	0.103	-1025.95	-368.1	-1394.05	IDH1 mutant	1p19q codel	Methylated	-0.707657	5.95934	0.0190945	0.177916	0.0281886	0	0.51324	0
TCGA-HT-A5R5-01	3.06062	Internal Validation	High	Cluster2	0	0.0109589	33	female	II	oligodendroglioma	0.457368	0.114	-414.34	541.152	126.812	IDH1 mutant	1p19q non-codel	Methylated	-0.66018	5.88774	0.0125882	0	0.00282266	0	0.270461	2.37862e-19
TCGA-HT-A5R7-01	1.92422	Internal Validation	Low	Cluster2	0	1.68493	33	female	III	astrocytoma	0.69097	0.238	-1055.3	-637.004	-1692.3	IDH1 mutant	1p19q non-codel	Methylated	-0.817012	5.93965	0.0357315	0.126541	0.0457706	0	0.252091	5.69927e-18
TCGA-HT-A5R9-01	1.18152	Training	Low	Cluster2	0	0.00547945	48	female	III	oligodendroglioma	0.812951	0.114	-1179.56	-899.698	-2079.26	IDH1 mutant	1p19q codel	Methylated	-0.780432	5.37008	0.0211537	0.0663177	0.123824	0.0010539	0.78168	1.2239e-18
TCGA-HT-A5RA-01	3.59893	Internal Validation	High	Cluster1	0	2.27945	65	female	III	astrocytoma	0.442875	0.429	-416.255	190.177	-226.078	IDH1 wildtype	1p19q non-codel	Unmethylated	-0.638196	5.66753	0.0160792	0.116943	0.0434008	0	0.286994	8.62937e-19
TCGA-HT-A5RB-01	1.06565	Training	Low	Cluster2	0	0.00821918	24	male	II	astrocytoma	0.643931	0.089	-1230.21	-1027.87	-2258.08	IDH1 mutant	1p19q non-codel	Methylated	-0.700018	5.79449	0.019051	0.107903	0.0281536	0	0.375854	1.11678e-18
TCGA-HT-A5RC-01	2.72525	Internal Validation	High	Cluster1	1	0.443836	70	female	III	astrocytoma	0.276538	0.265	-577.818	198.111	-379.707	IDH1 wildtype	1p19q non-codel	Unmethylated	-0.453777	5.71015	0.0164397	0.213078	0.0566571	0	0.406159	2.94175e-18
TCGA-HT-A614-01	1.02536	Training	Low	Cluster2	0	0.224658	47	male	II	oligoastrocytoma	0.567856	0.127	-1088.33	-287.723	-1376.06	IDH1 mutant	1p19q non-codel	Methylated	-0.598394	5.88738	0.0171177	0.174177	0.0418574	0	0.430758	0
TCGA-HT-A615-01	1.60582	Training	Low	Cluster2	0	1.41096	38	female	II	oligodendroglioma	0.706717	0.1	-749.839	438.042	-311.798	IDH1 mutant	1p19q codel	Methylated	-0.732791	5.56915	0.0243573	0.0578936	0.0131492	0	0.685863	3.4117e-19
TCGA-HT-A616-01	1.80464	Internal Validation	Low	Cluster2	0	0.150685	36	female	II	astrocytoma	0.633203	0.126	-1048.65	-834.448	-1883.1	IDH1 mutant	1p19q non-codel	Methylated	-0.669877	5.84183	0.0394792	0.152498	0.00865661	0	0.368412	5.1539e-18
TCGA-HT-A617-01	2.37976	Internal Validation	High	Cluster1	0	1.34521	47	male	II	oligodendroglioma	0.519861	0.212	-109.196	733.265	624.069	IDH1 wildtype	1p19q non-codel	Unmethylated	-0.735772	5.9858	0.0204404	0.204952	0.0332976	0	1.03543	0
TCGA-HT-A618-01	2.31833	Training	High	Cluster1	0	1.40274	37	female	III	astrocytoma	0.468606	0.177	-370.844	1200.41	829.563	IDH1 mutant	1p19q non-codel	Methylated	-0.603116	5.72297	0.013893	0.110505	0.00100123	0	0.674636	1.08353e-18
TCGA-HT-A619-01	1.26689	Training	Low	Cluster2	0	1.78356	51	female	III	oligodendroglioma	0.831505	0.089	-1547.64	-1051.07	-2598.71	IDH1 mutant	1p19q codel	Methylated	-0.578582	5.27809	0.0210225	0.093646	0.0616925	0.00186755	0.137114	0
TCGA-HT-A61A-01	1.27524	Internal Validation	Low	Cluster2	0	0.531507	20	female	II	oligodendroglioma	0.70061	0.153	-1104.64	-980.31	-2084.95	IDH1 mutant	1p19q non-codel	Methylated	-0.722844	5.91287	0.0578257	0.189033	0	0	0.662876	0
TCGA-HT-A61B-01	2.02435	Internal Validation	Low	Cluster1	0	1.46027	22	male	III	NA	0.714498	0.166	-301.46	1203.96	902.501	IDH1 mutant	1p19q non-codel	Methylated	-0.65696	5.61884	3.9127e-07	0	0.0180295	0	0.47793	0
TCGA-HT-A61C-01	2.10213	Training	High	Cluster1	1	1.47123	66	male	III	oligodendroglioma	0.653783	0.471	-573.672	303.782	-269.89	IDH1 wildtype	1p19q non-codel	Unmethylated	-0.667643	5.43403	0.00837063	0.0479084	0.0416718	0	0.910893	0
TCGA-HT-A74H-01	2.19306	Internal Validation	High	Cluster1	0	0.20274	62	male	III	astrocytoma	0.427783	0.268	-198.584	409.611	211.027	IDH1 wildtype	1p19q non-codel	Unmethylated	-0.531853	6.11873	0.0164095	0.0991149	0.0384495	0	1.94874	6.07744e-18
TCGA-HT-A74J-01	1.19594	Internal Validation	Low	Cluster2	0	0.876712	33	male	II	oligoastrocytoma	0.540126	0.154	-1169.88	-229.062	-1398.94	IDH1 mutant	1p19q non-codel	Unmethylated	-0.664604	5.8272	0.0147379	0.00647486	0.00433251	0	0.150598	0
TCGA-HT-A74K-01	1.66771	Internal Validation	Low	Cluster2	0	1.27945	58	female	III	NA	0.656381	0.13	-536.906	10.7512	-526.155	IDH1 mutant	1p19q codel	Methylated	-0.549343	5.94302	0.00173939	0.0419104	0	0	0.194443	5.05071e-18
TCGA-HT-A74L-01	1.36908	Internal Validation	Low	Cluster2	0	0.920548	22	female	II	NA	0.602295	0.128	-1060.89	-210.929	-1271.81	IDH1 mutant	1p19q codel	Methylated	-0.597412	5.54725	0.0189149	0.069121	0.0030144	0	0.109613	0
TCGA-HT-A74O-01	1.87888	Training	Low	Cluster1	0	0.00821918	34	male	III	astrocytoma	0.544663	0.137	-419.665	994.805	575.141	IDH1 mutant	1p19q non-codel	Methylated	-0.533464	5.92896	1.71212e-06	0	0.0423688	0	0.276228	5.9191e-18
TCGA-HW-7486-01	2.02702	Training	Low	Cluster2	0	4.71507	37	male	II	oligodendroglioma	0.69076	0.09	-797.557	-175.683	-973.24	IDH1 mutant	1p19q codel	Methylated	-0.697814	5.76619	0.0164288	0.393635	0.000650635	0	1.16864	6.22964e-18
TCGA-HW-7487-01	1.84167	Internal Validation	Low	Cluster2	0	3.7863	39	male	II	oligodendroglioma	0.761037	0.086	-1338.87	-982.252	-2321.12	IDH1 mutant	1p19q codel	Methylated	-0.820549	5.6969	0.0352014	0.19606	0.0198524	0	0.173306	0
TCGA-HW-7489-01	1.87096	Internal Validation	Low	Cluster2	1	3.45753	38	male	II	oligoastrocytoma	0.702312	0.099	-1018.44	-610.897	-1629.34	IDH1 mutant	1p19q non-codel	Methylated	-0.74174	5.88357	0.0345509	0.183603	0.0249672	0	0.482086	0
TCGA-HW-7490-01	2.68621	Training	High	Cluster2	0	3.8	41	male	II	astrocytoma	0.594278	0.087	-705.069	75.3677	-629.701	IDH1 mutant	1p19q non-codel	Methylated	-0.65158	5.76943	0.0133978	0.243142	0.00956388	0	1.06728	0
TCGA-HW-7491-01	2.44281	Internal Validation	High	Cluster2	0	5.69315	35	male	II	oligodendroglioma	0.788389	0.06	-1285.5	-803.134	-2088.63	IDH1 mutant	1p19q codel	Unmethylated	-0.641778	5.40503	0.0212815	0.196574	0	0	0.133404	0
TCGA-HW-7493-01	3.07877	Internal Validation	High	Cluster2	0	5.7726	40	female	II	astrocytoma	0.593257	0.074	-239.912	148.749	-91.1636	NA	1p19q non-codel	Methylated	-0.617201	5.72233	0.0275475	0.33765	0	0	0.775459	0
TCGA-HW-7495-01	1.8358	Internal Validation	Low	Cluster2	0	2.95342	45	female	II	oligodendroglioma	0.617884	0.076	-1180.41	-1038.68	-2219.09	IDH1 mutant	1p19q codel	Methylated	-0.658013	5.76327	0.0290145	0.263382	0.0120624	0	0.351927	1.36799e-17
TCGA-HW-8319-01	1.42159	Internal Validation	Low	Cluster2	1	3.31233	34	female	III	astrocytoma	0.597881	0.189	-1037.63	-577.657	-1615.29	IDH1 mutant	1p19q non-codel	Unmethylated	-0.664392	5.67913	0.0229653	0.23949	0.0176928	0	0.348032	0
TCGA-HW-8320-01	1.63029	Training	Low	Cluster2	0	3.33425	36	male	III	astrocytoma	0.576895	0.088	-842.104	-43.8283	-885.932	IDH1 mutant	1p19q non-codel	Methylated	-0.602239	5.61621	0.00884436	0.113294	0	0	0.160244	0
TCGA-HW-8321-01	2.40185	Training	High	Cluster2	0	3.54521	31	male	III	astrocytoma	0.493126	0.133	-774.666	-87.3275	-861.993	IDH1 mutant	1p19q non-codel	Methylated	-0.785615	5.72788	0.0122421	0.233321	0	0	0.528909	2.1784e-19
TCGA-HW-8322-01	1.88382	Training	Low	Cluster2	0	2.07671	39	male	II	oligodendroglioma	0.749431	0.102	-1221.81	-457.565	-1679.37	IDH1 mutant	1p19q codel	Methylated	-0.60523	5.48558	0.0218756	0.152159	0.0487922	0	0.6164	2.56742e-19
TCGA-HW-A5KJ-01	1.99897	Training	Low	Cluster2	1	2.63562	68	male	III	oligodendroglioma	0.712149	0.12	-1382.18	-771.653	-2153.83	IDH1 mutant	1p19q codel	Methylated	-0.752371	5.70827	0.0121383	0.1005	0.409695	0	0.334467	0
TCGA-HW-A5KK-01	2.0063	Training	Low	Cluster1	1	1.06301	64	male	III	astrocytoma	0.326597	0.203	-251.933	1033.01	781.076	IDH1 wildtype	1p19q non-codel	Methylated	-0.666301	5.97263	0.00819633	0.130949	0.0167024	0	0.992053	0
TCGA-HW-A5KL-01	0.914466	Training	Low	Cluster2	0	2.40548	42	female	II	astrocytoma	0.569552	0.075	-952.551	-58.6893	-1011.24	IDH1 mutant	1p19q non-codel	Methylated	-0.665981	5.80228	0.013336	0.0210926	0.0376513	0	0.480245	2.41181e-20
TCGA-HW-A5KM-01	2.10446	Internal Validation	High	Cluster1	0	1.72603	35	male	II	astrocytoma	0.588791	0.121	47.0731	1831.86	1878.93	IDH1 mutant	1p19q non-codel	Methylated	-0.602321	5.57677	1.72098e-06	0	0.0202341	0	0.15801	0
TCGA-IK-7675-01	1.72492	Training	Low	Cluster2	1	1.58356	43	male	II	oligodendroglioma	0.622741	0.162	-1147.71	-792.037	-1939.75	IDH1 mutant	1p19q non-codel	Methylated	-0.670102	5.75526	0.0152697	0.29411	0.00772801	0	0.250825	3.91023e-18
TCGA-IK-8125-01	2.26299	Training	High	Cluster2	0	3.56438	62	male	III	oligoastrocytoma	0.743975	0.113	-1027.74	-572.383	-1600.13	IDH1 mutant	1p19q codel	Methylated	-0.782581	5.58191	0.0220483	0.11625	0.0134787	0	0.692855	0
TCGA-KT-A74X-01	1.79782	Training	Low	Cluster2	0	1.2	26	male	III	oligoastrocytoma	0.794115	0.092	-1352.52	-416.291	-1768.81	IDH1 mutant	1p19q codel	Methylated	-0.783857	5.63123	0.0125507	0.147913	0.0455336	0	0.466897	0
TCGA-KT-A7W1-01	2.29158	Training	High	Cluster1	0	1.2	45	female	III	astrocytoma	0.640041	0.346	-1036.14	-371.709	-1407.85	IDH1 wildtype	1p19q non-codel	Methylated	-0.716599	5.58361	0.0118144	0.121191	0.0814896	0	1.49764	0
TCGA-P5-A5EV-01	1.50619	Training	Low	Cluster2	0	0.0191781	39	male	II	astrocytoma	0.658244	0.114	-1002.22	-100.747	-1102.96	IDH1 mutant	1p19q non-codel	Methylated	-0.670925	5.82652	0.0138993	0.113674	0.0584027	0	1.34716	3.46146e-18
TCGA-P5-A5EW-01	1.92026	Internal Validation	Low	Cluster2	0	0.558904	20	female	II	astrocytoma	0.550441	0.106	-779.712	-84.1629	-863.875	IDH1 mutant	1p19q non-codel	Methylated	-0.530701	5.77237	0.00665639	0.183756	0	0	0.628867	0
TCGA-P5-A5EX-01	4.002	Internal Validation	High	Cluster1	0	0.665753	41	female	III	oligodendroglioma	0.34051	0.229	32.0652	1175.33	1207.4	IDH1 mutant	1p19q codel	Methylated	-0.43963	5.72407	0.00925167	0.338957	0.0976649	0	1.72993	1.16317e-18
TCGA-P5-A5EY-01	2.62076	Training	High	Cluster2	0	0.19726	21	male	II	astrocytoma	0.594554	0.212	-765.453	-307.597	-1073.05	IDH1 wildtype	1p19q non-codel	Unmethylated	-0.750198	6.08794	0.026222	0.150351	0.156196	0	1.25347	4.47713e-18
TCGA-P5-A5EZ-01	1.23745	Training	Low	Cluster2	0	0.191781	39	male	III	astrocytoma	0.626334	0.148	-712.053	279.147	-432.906	IDH1 mutant	1p19q non-codel	Methylated	-0.751379	5.81988	0.0187761	0.15663	0.0993458	0.00170151	2.34636	0
TCGA-P5-A5F0-01	1.33087	Training	Low	Cluster2	0	0.786301	33	male	II	oligodendroglioma	0.719456	0.113	-1674.51	-1336.43	-3010.94	IDH1 mutant	1p19q codel	Methylated	-0.723865	5.71941	0.0326053	0.0931815	0.12603	0	0.138744	6.84372e-18
TCGA-P5-A5F1-01	2.4667	Training	High	Cluster2	0	0.490411	30	male	II	astrocytoma	0.522894	0.139	-617.765	129.111	-488.653	IDH1 mutant	1p19q non-codel	Unmethylated	-0.622866	6.02172	0.0087643	0.106093	0.0520468	0	0.888189	0
TCGA-P5-A5F2-01	1.45474	Training	Low	Cluster2	0	0.663014	36	female	II	astrocytoma	0.501669	0.143	-1256.93	-891.359	-2148.29	IDH1 mutant	1p19q non-codel	Methylated	-0.709247	5.98165	0.0175752	0.115775	0.0110209	0	0.340514	0
TCGA-P5-A5F4-01	1.48857	Training	Low	Cluster2	0	0.632877	35	female	III	oligodendroglioma	0.662322	0.106	-1236.15	-1014.5	-2250.65	IDH1 mutant	1p19q non-codel	Methylated	-0.663342	5.84629	0.0301958	0.133157	0.0523721	0	0.572231	2.95687e-18
TCGA-P5-A5F6-01	2.82284	Training	High	Cluster2	0	0.106849	26	male	II	oligodendroglioma	0.366148	0.168	-613.274	-372.005	-985.279	IDH1 wildtype	1p19q non-codel	Unmethylated	-0.721969	6.26057	0.0110845	0.18777	0.0498029	0	0.0932062	2.02175e-18
TCGA-P5-A72U-01	3.22832	Internal Validation	High	Cluster1	0	0.0191781	71	female	III	oligodendroglioma	0.338607	0.197	313.77	757.535	1071.3	IDH1 wildtype	1p19q non-codel	Methylated	-0.533683	6.00568	0.0170634	0.0690804	0.0839123	0	1.00959	0
TCGA-P5-A72W-01	1.76644	Internal Validation	Low	Cluster2	0	0.868493	35	male	III	astrocytoma	0.67974	0.127	-1157.98	-283.375	-1441.35	IDH1 mutant	1p19q non-codel	Unmethylated	-0.609599	6.0098	0.0044245	0.110998	0.0504922	0	0.454	0
TCGA-P5-A72X-01	2.03594	Internal Validation	Low	Cluster2	0	1.10411	21	male	III	astrocytoma	0.400277	0.109	-653.14	-352.413	-1005.55	IDH1 mutant	1p19q non-codel	Methylated	-0.680253	5.92373	0.0145602	0.138425	0.0223547	0	0.690229	0
TCGA-P5-A72Z-01	1.57027	Internal Validation	Low	Cluster2	0	0.969863	64	female	III	oligodendroglioma	0.80937	NA	-1515.92	-1038.5	-2554.42	IDH1 mutant	1p19q codel	Methylated	-0.629855	5.62112	0.0209384	0.00190376	0.0520993	0	0.051594	0
TCGA-P5-A730-01	2.2908	Internal Validation	High	Cluster2	0	0.912329	22	male	III	oligoastrocytoma	0.552788	0.052	-1036.36	-668.146	-1704.5	IDH1 mutant	1p19q codel	Methylated	-0.76538	5.69422	0.0176734	0.170733	0.0575726	0	0.406986	9.14249e-19
TCGA-P5-A731-01	2.3269	Training	High	Cluster2	0	0.750685	59	female	II	oligoastrocytoma	0.499807	0.128	-486.959	-207.292	-694.251	IDH1 mutant	1p19q non-codel	Methylated	-0.581107	5.83729	0.0182599	0.133076	0	0	0.291602	0
TCGA-P5-A733-01	2.30247	Training	High	Cluster2	0	1.13425	52	female	II	astrocytoma	0.604375	0.147	-1067.88	-617.524	-1685.41	IDH1 mutant	1p19q non-codel	Methylated	-0.736577	5.94338	0.0133369	0.152172	0.00504961	0	0.424957	4.49137e-18
TCGA-P5-A735-01	0.852595	Internal Validation	Low	Cluster2	0	0.8	38	female	II	NA	0.685061	0.118	-1259.84	-347.937	-1607.78	IDH1 mutant	1p19q non-codel	Methylated	-0.658298	5.81949	0.0105106	0.0436493	0.028919	0	0.158934	0
TCGA-P5-A736-01	2.34226	Internal Validation	High	Cluster1	0	0.630137	44	female	III	NA	0.440589	0.138	-222.909	907.667	684.758	IDH1 mutant	1p19q non-codel	Methylated	-0.555799	6.07997	0.00108824	0	0.0389706	0	1.03789	0
TCGA-P5-A737-01	1.41948	Internal Validation	Low	Cluster2	0	1.01918	47	male	II	NA	0.746425	NA	-1198	-520.908	-1718.91	IDH1 mutant	1p19q codel	Methylated	-0.652328	5.72343	0.0159588	0	0.0183035	0	0.742099	1.61715e-18
TCGA-P5-A77W-01	1.18166	Internal Validation	Low	Cluster2	0	1.6	37	female	III	NA	0.887908	0.042	-1463.2	-988.573	-2451.78	IDH1 mutant	1p19q codel	Methylated	-0.694108	5.31681	0.0222346	0.0796977	0.00197219	0	0.562146	1.24613e-19
TCGA-P5-A77X-01	1.32491	Internal Validation	Low	Cluster2	0	0.287671	55	female	II	NA	0.709188	0.171	-1437.52	-1154.44	-2591.96	IDH1 mutant	1p19q codel	Methylated	-0.746934	5.70118	0.0254852	0.13219	0.0730307	0	0.593362	3.76499e-19
TCGA-P5-A780-01	1.50711	Internal Validation	Low	Cluster2	0	0.19726	44	female	III	NA	0.489884	0.122	-605.662	-1.48945	-607.151	IDH1 mutant	1p19q non-codel	Methylated	-0.671491	5.7019	0.0106555	0.198691	0.0307071	0	0.448399	8.3009e-20
TCGA-P5-A781-01	1.52446	Internal Validation	Low	Cluster2	0	0.367123	34	female	III	NA	0.654332	0.134	-1085.19	-641.804	-1727	IDH1 mutant	1p19q codel	Methylated	-0.723786	5.71693	0.0168964	0.172869	0.0113051	0	0.693853	5.69428e-18
TCGA-QH-A65R-01	1.35852	Training	Low	Cluster2	0	1.26301	38	female	III	oligodendroglioma	0.70162	0.082	-1211.52	-744.713	-1956.23	IDH1 mutant	1p19q codel	Methylated	-0.745582	5.61159	0.016675	0.0676731	0.0393317	0	0.331604	0
TCGA-QH-A65S-01	1.44275	Training	Low	Cluster2	0	0.210959	32	female	II	oligoastrocytoma	0.605375	0.133	-856.029	118.436	-737.594	IDH1 mutant	1p19q non-codel	Methylated	-0.651039	5.91153	0.00294756	0.143799	0.0374182	0	0.487271	0
TCGA-QH-A65V-01	1.95969	Internal Validation	Low	Cluster2	0	1.05205	43	female	II	oligodendroglioma	0.675264	0.102	-1050.12	-307.924	-1358.05	IDH1 mutant	1p19q codel	Methylated	-0.707265	5.83499	0.00845717	0.146032	0	0	0.361782	0
TCGA-QH-A65X-01	2.38158	Internal Validation	High	Cluster2	0	1.32055	28	female	III	oligoastrocytoma	0.753829	0.119	-906.891	-117.683	-1024.57	IDH1 mutant	1p19q codel	Methylated	-0.711778	5.77948	0.00730308	0.0787439	0.0503426	0	0.980504	1.07039e-18
TCGA-QH-A65Z-01	1.50738	Training	Low	Cluster2	0	1.16986	54	male	II	oligodendroglioma	0.730895	0.04	-1344.5	-786.084	-2130.58	IDH1 mutant	1p19q codel	Methylated	-0.688096	5.74233	0.0137717	0.0891507	0	0	0.360456	0
TCGA-QH-A6CS-01	2.34527	Internal Validation	High	Cluster1	0	1.61096	41	male	III	astrocytoma	0.498125	0.202	-558.432	105.693	-452.739	IDH1 wildtype	1p19q non-codel	Unmethylated	-0.690519	6.17703	0.0184653	0.198018	0	0	0.438279	0
TCGA-QH-A6CU-01	2.02755	Internal Validation	Low	Cluster2	0	1.23562	52	female	III	oligodendroglioma	0.56518	0.127	-732.694	87.1354	-645.558	IDH1 mutant	1p19q codel	Methylated	-0.602343	6.05919	0.00638283	0.106555	0	0	0.305282	0
TCGA-QH-A6CV-01	1.86024	Internal Validation	Low	Cluster1	0	1.21096	51	male	III	oligoastrocytoma	0.585855	0.264	-628.025	542.373	-85.6519	IDH1 wildtype	1p19q non-codel	Unmethylated	-0.661263	5.79252	0.0026102	0.03072	0.0258472	0	0.499472	3.67861e-19
TCGA-QH-A6CW-01	1.62988	Training	Low	Cluster2	0	1.13425	43	male	III	oligoastrocytoma	0.470937	0.142	-879.398	150.566	-728.833	IDH1 mutant	1p19q non-codel	Methylated	-0.618368	5.74689	0.00232879	0	0.0135264	0	0.0351711	2.26046e-18
TCGA-QH-A6CX-01	2.49397	Internal Validation	High	Cluster1	1	1.01918	66	male	II	astrocytoma	0.379368	0.212	-507.636	370.705	-136.931	IDH1 wildtype	1p19q non-codel	Unmethylated	-0.526901	6.23986	0.00700417	0.170653	0.0133833	0	0.699826	1.6401e-17
TCGA-QH-A6CY-01	1.66428	Training	Low	Cluster2	0	1.11781	38	male	III	oligoastrocytoma	0.769375	0.116	-1193.92	-772.562	-1966.48	IDH1 mutant	1p19q codel	Methylated	-0.70247	5.78149	0.0307587	0.178405	0.0251682	0	0.445408	9.4839e-18
TCGA-QH-A6CZ-01	1.57718	Internal Validation	Low	Cluster2	0	0.764384	38	male	II	oligoastrocytoma	0.800653	0.159	-1287.21	-1037.6	-2324.81	IDH1 mutant	1p19q codel	Methylated	-0.797795	5.59622	0.0268835	0.119711	0.0889953	0	0.552823	0
TCGA-QH-A6X3-01	2.04579	Training	Low	Cluster2	0	0.857534	27	male	II	oligoastrocytoma	0.661038	0.13	-1002.72	-279.199	-1281.91	IDH1 mutant	1p19q non-codel	Methylated	-0.709162	5.68915	0.0267319	0.126173	0	0	0.476605	1.0984e-18
TCGA-QH-A6X4-01	0.977133	Training	Low	Cluster2	0	1.21096	47	male	III	oligoastrocytoma	0.683528	0.144	-1551.87	-681.103	-2232.97	IDH1 mutant	1p19q codel	Methylated	-0.7945	5.7653	0.015918	0.0196008	0.0146433	0	0.277214	0
TCGA-QH-A6X5-01	1.52035	Internal Validation	Low	Cluster2	0	1.36164	58	female	II	oligoastrocytoma	0.652753	0.12	-1131.63	-538.485	-1670.12	IDH1 mutant	1p19q codel	Methylated	-0.766669	5.88319	0.0117393	0.161702	0	0	0.735095	2.29525e-17
TCGA-QH-A6X8-01	1.31134	Internal Validation	Low	Cluster2	0	1.39452	56	female	III	oligodendroglioma	0.68578	0.128	-1228.61	-509.7	-1738.31	IDH1 mutant	1p19q codel	Methylated	-0.711221	5.76312	0.0124906	0.00602248	0.0322431	0	0.0302742	0
TCGA-QH-A6X9-01	1.06319	Internal Validation	Low	Cluster2	0	0.158904	73	female	II	oligodendroglioma	0.679056	NA	-1136.64	-646.45	-1783.09	IDH1 mutant	1p19q non-codel	Methylated	-0.675363	5.73037	0.0217765	0.106662	0	0	0.151483	3.25794e-19
TCGA-QH-A6XA-01	1.44952	Training	Low	Cluster2	0	1.37534	23	female	II	oligoastrocytoma	0.598019	0.12	-897.734	-225.865	-1123.6	IDH1 mutant	1p19q non-codel	Methylated	-0.725248	5.82814	0.0073408	0.135869	0.0151308	0	0.395343	0
TCGA-QH-A6XC-01	2.57869	Training	High	Cluster1	0	1.39178	48	male	III	astrocytoma	0.682116	0.277	-812.385	-240.762	-1053.15	IDH1 wildtype	1p19q non-codel	Methylated	-0.721926	5.92807	0.0212079	0.0713653	0	0	0.11421	0
TCGA-QH-A86X-01	1.57113	Training	Low	Cluster2	0	0.923288	33	male	II	oligodendroglioma	0.660957	0.092	-1292.76	-708.796	-2001.56	IDH1 mutant	1p19q codel	Methylated	-0.731605	5.70711	0.0199999	0.0497418	0.0437348	0	0.417064	0
TCGA-QH-A870-01	1.52559	Internal Validation	Low	Cluster2	0	1.08219	38	female	III	oligoastrocytoma	0.52477	0.14	-1220.04	-544.454	-1764.49	IDH1 mutant	1p19q non-codel	Methylated	-0.662031	5.93136	0.011809	0.12876	0	0	0.238634	6.48664e-18
TCGA-R8-A6MK-01	1.43291	Internal Validation	Low	Cluster2	0	7.40274	40	male	II	oligodendroglioma	0.676976	NA	-1232.57	-542.265	-1774.84	IDH1 mutant	1p19q codel	Methylated	-0.659267	5.76128	0.014123	0.105687	0	0	0.432615	4.33186e-18
TCGA-R8-A6ML-01	1.65627	Training	Low	Cluster2	0	7.83562	52	male	III	oligodendroglioma	0.666067	0.101	-1511.25	-912.044	-2423.29	IDH1 mutant	1p19q codel	Methylated	-0.794511	5.68831	0.0150092	0.150632	0.0849032	0	0.580076	5.44437e-18
TCGA-R8-A6MO-01	1.69214	Internal Validation	Low	Cluster2	0	2.72055	53	female	II	oligodendroglioma	0.574518	0.128	-1111.56	-173.051	-1284.61	IDH1 mutant	1p19q codel	Methylated	-0.785631	5.7408	0.0102748	0.0902221	0.060879	0	0.525207	1.33492e-18
TCGA-R8-A73M-01	1.01388	Internal Validation	Low	Cluster2	0	4.94795	48	female	II	oligodendroglioma	0.845045	NA	-1488.19	-890.729	-2378.92	IDH1 mutant	1p19q codel	Methylated	-0.777572	5.81936	0.0133925	0.0166002	0.00713466	0	0.135834	1.33922e-18
TCGA-RY-A83X-01	0.998858	Internal Validation	Low	Cluster2	0	2.5726	46	female	II	NA	0.659678	0.061	-1380.57	-883.624	-2264.19	IDH1 mutant	1p19q codel	Methylated	-0.741662	5.74938	0.0182303	0.0972684	0.0249912	0	0.489013	0
TCGA-RY-A83Y-01	1.49532	Internal Validation	Low	Cluster2	0	0.454795	45	male	II	NA	0.717295	0.098	-1159.8	-70.6412	-1230.44	IDH1 mutant	1p19q codel	Methylated	-0.752399	5.81962	0.0142365	0.0229961	0.0865884	0	0.525286	0
TCGA-RY-A83Z-01	0.568617	Internal Validation	Low	Cluster2	0	0.824658	54	female	III	NA	0.783356	0.329	-1403.79	-29.6484	-1433.44	IDH1 mutant	1p19q non-codel	Methylated	-0.80432	5.86797	0.00376292	0.00844204	0.0147618	0	0.102791	8.05001e-18
TCGA-RY-A840-01	1.26861	Internal Validation	Low	Cluster2	0	2.33973	47	male	III	NA	0.769075	0.118	-1506.22	-739.106	-2245.33	IDH1 mutant	1p19q codel	Methylated	-0.762821	5.69633	0.0214813	0.0218041	0.011115	0	0.29608	0
TCGA-RY-A843-01	1.50168	Internal Validation	Low	Cluster2	0	0.172603	30	male	III	NA	0.625395	0.089	-1064.84	-407.488	-1472.32	IDH1 mutant	1p19q non-codel	Methylated	-0.858492	5.84133	0.0254527	0.103192	0.000587515	0	0.366674	0
TCGA-RY-A845-01	1.33566	Internal Validation	Low	Cluster2	0	1.63288	40	female	II	NA	0.587057	0.105	-1116.97	-396.411	-1513.38	IDH1 mutant	1p19q non-codel	Methylated	-0.599586	5.7592	0.0166279	0.0613522	0	0	0	0
TCGA-RY-A847-01	1.36501	Internal Validation	Low	Cluster2	0	2.55616	45	male	II	NA	0.71439	0.146	-735.391	102.744	-632.647	IDH1 mutant	1p19q codel	Methylated	-0.711391	5.7392	0.0206557	0	0.0105894	0	0.547052	2.96296e-18
TCGA-S9-A6TS-01	1.5224	Internal Validation	Low	Cluster2	1	5.18082	48	female	III	astrocytoma	0.563373	0.188	-930.149	-15.9902	-946.14	IDH1 mutant	1p19q non-codel	Methylated	-0.775205	5.86408	0.0172377	0.0758143	0	0	0.215231	4.99205e-20
TCGA-S9-A6TU-01	1.01539	Internal Validation	Low	Cluster2	0	7.26027	38	male	II	astrocytoma	0.523232	0.077	-652.655	364.946	-287.708	IDH1 mutant	1p19q non-codel	Methylated	-0.661251	5.89036	0.0148795	0.0309533	0.00413165	0	0.440816	0
TCGA-S9-A6TV-01	4.08294	Internal Validation	High	Cluster1	0	1.56438	50	male	III	oligoastrocytoma	0.412255	0.134	-13.396	1091.66	1078.27	IDH1 mutant	1p19q non-codel	Methylated	-0.681692	5.65225	0.0117231	0.109264	0.0254889	0	0.107194	6.91587e-19
TCGA-S9-A6TW-01	1.7136	Training	Low	Cluster2	0	3.42466	40	male	III	oligodendroglioma	0.634615	0.151	-757	-372.848	-1129.85	IDH1 mutant	1p19q codel	Methylated	-0.735907	5.51824	0.0173183	0.140954	0.0943454	0.000481138	0.877089	0
TCGA-S9-A6TX-01	1.55305	Training	Low	Cluster2	0	3.41096	46	male	III	oligodendroglioma	0.629405	0.113	-1125.6	-530.428	-1656.03	IDH1 mutant	1p19q codel	Methylated	-0.74281	5.80728	0.0163908	0.0486374	0.0335913	0	0.98745	0
TCGA-S9-A6TY-01	1.29643	Training	Low	Cluster2	0	2.94795	50	male	II	oligodendroglioma	0.809004	0.102	-1645.01	-1337.26	-2982.27	IDH1 mutant	1p19q codel	Methylated	-0.70125	5.56609	0.0256403	0.099956	0.0285572	0	0.085277	2.8971e-18
TCGA-S9-A6TZ-01	1.37911	Training	Low	Cluster2	0	3.06849	39	female	II	astrocytoma	0.542534	0.103	-654.407	2.81044	-651.596	IDH1 mutant	1p19q non-codel	Methylated	-0.748547	5.75684	0.0115817	0.228072	0	0	0.896057	6.74558e-20
TCGA-S9-A6U0-01	3.0725	Internal Validation	High	Cluster1	1	2.03288	46	male	III	astrocytoma	0.276409	NA	306.558	1161.36	1467.92	IDH1 wildtype	1p19q non-codel	Methylated	-0.486776	5.67136	0.0153592	0.320674	0.0631082	0	2.43398	0
TCGA-S9-A6U1-01	1.01433	Internal Validation	Low	Cluster2	0	2.15068	22	female	III	astrocytoma	0.603644	0.073	-919.755	-149.4	-1069.15	IDH1 mutant	1p19q non-codel	Methylated	-0.686053	5.67013	0.0188431	0.175071	0.000113964	0	0.342295	2.22712e-18
TCGA-S9-A6U2-01	1.63424	Training	Low	Cluster2	0	2.48767	48	female	II	oligodendroglioma	0.561698	0.098	-789.212	-325.413	-1114.62	IDH1 mutant	1p19q codel	Methylated	-0.682089	5.67133	0.0147289	0.0258973	0.00762267	0	0.296254	0
TCGA-S9-A6U5-01	2.13508	Training	High	Cluster2	0	2.71781	33	male	II	astrocytoma	0.636646	0.148	-966.812	352.865	-613.948	IDH1 mutant	1p19q codel	Methylated	-0.717409	5.80781	0.00732727	0.0818026	0.111755	0	1.58011	1.68011e-18
TCGA-S9-A6U6-01	1.46991	Internal Validation	Low	Cluster2	0	2.92877	28	male	III	astrocytoma	0.624864	0.173	-1045.59	-373.288	-1418.88	IDH1 mutant	1p19q non-codel	Methylated	-0.852242	5.82432	0.0137739	0.0863772	0.00929587	0	0.268396	2.93227e-18
TCGA-S9-A6U8-01	0.89399	Training	Low	Cluster2	1	8.1863	24	male	II	astrocytoma	0.492198	0.096	-710.495	245.726	-464.769	IDH1 mutant	1p19q non-codel	Methylated	-0.613551	5.79776	0.00854082	0.108508	0	0	0.159508	0
TCGA-S9-A6U9-01	2.26734	Training	High	Cluster2	0	7.99452	36	male	III	astrocytoma	0.325008	0.057	-232.138	701.011	468.873	IDH1 mutant	1p19q non-codel	Methylated	-0.598969	5.83446	0.00968226	0	0	0	0.756831	0
TCGA-S9-A6UA-01	3.11948	Training	High	Cluster1	1	0.487671	66	male	III	astrocytoma	0.304108	0.302	454.765	1486.49	1941.25	IDH1 wildtype	1p19q non-codel	Methylated	-0.576236	5.61695	0.026568	0.0643393	0.0960691	0.00366024	2.93637	4.36111e-18
TCGA-S9-A6UB-01	1.32755	Internal Validation	Low	Cluster2	0	10.3041	52	male	II	oligodendroglioma	0.776623	0.113	-1566.55	-1108.74	-2675.28	IDH1 mutant	1p19q codel	Methylated	-0.666792	5.5658	0.0219006	0.0648832	0.0346526	0	0.331286	0
TCGA-S9-A6WD-01	1.38631	Internal Validation	Low	Cluster2	0	6.27123	58	male	III	oligodendroglioma	0.75374	0.137	-1389.85	-851.383	-2241.23	IDH1 mutant	1p19q codel	Methylated	-0.762371	5.70634	0.0164666	0.042343	0.0128009	0	0.385545	0
TCGA-S9-A6WE-01	1.71233	Internal Validation	Low	Cluster2	0	11.2685	34	male	II	oligodendroglioma	0.680208	0.088	-1119.01	-530.512	-1649.52	IDH1 mutant	1p19q codel	Methylated	-0.73562	5.6199	0.0157055	0.144454	0	0	0.516783	0
TCGA-S9-A6WG-01	2.7411	Internal Validation	High	Cluster1	0	7.12877	31	male	III	astrocytoma	0.2682	0.1	431.111	837.785	1268.9	IDH1 mutant	1p19q non-codel	Methylated	-0.691181	5.74114	0.0117799	0.0525469	0.00946853	0	1.06299	0
TCGA-S9-A6WH-01	1.41463	Internal Validation	Low	Cluster2	0	3.2137	73	female	II	oligoastrocytoma	0.796982	0.083	-1419.8	-737.721	-2157.52	IDH1 mutant	1p19q codel	Methylated	-0.739608	5.60837	0.0234766	0.0217088	0.037603	0	0.690623	5.17946e-19
TCGA-S9-A6WI-01	1.76006	Internal Validation	Low	Cluster2	0	7.08219	56	female	II	oligoastrocytoma	0.762897	0.188	-1056.97	-1138.78	-2195.75	IDH1 mutant	1p19q non-codel	Methylated	-0.762276	5.97639	0.0619685	0.201416	0.0949776	0	0.593251	4.32225e-18
TCGA-S9-A6WL-01	2.56269	Internal Validation	High	Cluster2	0	2.59178	52	male	III	astrocytoma	0.578846	0.133	-687.473	-785.232	-1472.7	IDH1 mutant	1p19q codel	Methylated	-0.74809	5.54205	0.0244125	0.104027	0.00527873	0	0.310699	1.61728e-18
TCGA-S9-A6WM-01	2.4169	Training	High	Cluster1	0	1.65479	59	female	III	astrocytoma	0.45983	0.392	-505.042	-288.799	-793.841	IDH1 wildtype	1p19q non-codel	Unmethylated	-0.61771	5.84587	0.0157859	0.16024	0.0106398	0	0.57978	0
TCGA-S9-A6WN-01	3.28081	Training	High	Cluster1	0	2.20548	38	female	III	astrocytoma	0.367656	0.18	-232.798	929.387	696.588	IDH1 mutant	1p19q codel	Methylated	-0.591463	5.70941	0.0180065	0.215951	0.00803799	0	0.53011	0
TCGA-S9-A6WO-01	1.12714	Internal Validation	Low	Cluster2	0	1.55068	29	male	II	astrocytoma	0.609097	0.088	-928.731	289.844	-638.887	IDH1 mutant	1p19q non-codel	Methylated	-0.575209	5.65299	0.00669905	0.0793891	0	0	0.457599	0
TCGA-S9-A6WP-01	1.67472	Training	Low	Cluster2	0	1.55342	42	male	III	oligoastrocytoma	0.68398	0.065	-949.818	138.615	-811.202	IDH1 mutant	1p19q codel	Methylated	-0.815058	5.61844	0.0155875	0.0680522	0.0570014	0	0.996584	2.78595e-18
TCGA-S9-A6WQ-01	1.60423	Training	Low	Cluster2	0	1.1726	57	female	II	oligoastrocytoma	0.571096	0.104	-682.098	479.556	-202.542	IDH1 mutant	1p19q non-codel	Methylated	-0.710823	5.93298	0.00586762	0.034671	0.0370738	0	0.414879	4.08926e-18
TCGA-S9-A7IQ-01	1.31107	Internal Validation	Low	Cluster2	0	3.01096	45	female	II	oligoastrocytoma	0.780338	0.109	-1334.13	-1397.27	-2731.4	IDH1 mutant	1p19q codel	Methylated	-0.732416	5.90835	0.0652997	0.169585	0.0389756	0	0.707085	0
TCGA-S9-A7IS-01	1.08988	Training	Low	Cluster2	1	0.660274	33	female	III	astrocytoma	0.802954	0.259	-1255.01	-455.798	-1710.81	IDH1 mutant	1p19q non-codel	Methylated	-0.734115	5.35954	0.0150605	0.0727943	0.01151	0	0.201939	0
TCGA-S9-A7IX-01	2.96633	Internal Validation	High	Cluster1	1	2.24384	57	male	III	astrocytoma	0.493329	0.269	-241.695	465.893	224.198	IDH1 wildtype	1p19q non-codel	Unmethylated	-0.678403	5.74601	0.0239131	0.0464825	0	0	0.478542	0
TCGA-S9-A7IY-01	2.07052	Internal Validation	Low	Cluster2	0	1.9589	39	male	III	oligoastrocytoma	0.585091	0.081	-791.334	368.97	-422.364	IDH1 mutant	1p19q codel	Methylated	-0.731781	5.81903	0.0141	0.0109387	0.0195573	0	1.0174	6.77959e-18
TCGA-S9-A7IZ-01	1.92058	Internal Validation	Low	Cluster2	0	1.66575	48	female	III	astrocytoma	0.449423	0.178	-762.837	48.7698	-714.067	IDH1 mutant	1p19q non-codel	Methylated	-0.708691	5.87162	0.0254278	0.104719	0.00857726	0	0.263161	2.50719e-18
TCGA-S9-A7J0-01	0.417191	Training	Low	Cluster2	0	1.66849	30	female	III	oligodendroglioma	0.938797	0.091	-1527.79	-737.309	-2265.1	IDH1 mutant	1p19q non-codel	Methylated	-0.718197	5.35802	0.0141501	0.133476	0.0413845	0	0.0787715	5.51604e-18
TCGA-S9-A7J1-01	1.43569	Training	Low	Cluster2	0	0.682192	43	male	II	oligodendroglioma	0.61268	0.109	-968.502	-421.769	-1390.27	IDH1 mutant	1p19q codel	Methylated	-0.8134	5.73942	0.0191702	0.0711449	0.00297391	0	0.446334	3.30666e-18
TCGA-S9-A7J2-01	1.21045	Training	Low	Cluster2	0	0.169863	25	male	III	oligodendroglioma	0.680345	0.078	-1344.83	-924.745	-2269.58	IDH1 mutant	1p19q codel	Methylated	-0.730415	5.64818	0.0138958	0.0627321	0.0129441	0	0.525521	0
TCGA-S9-A7J3-01	1.52609	Internal Validation	Low	Cluster2	0	1.72329	52	female	III	oligodendroglioma	0.595064	0.079	-1140.65	-316.454	-1457.1	IDH1 mutant	1p19q codel	Methylated	-0.748509	5.71413	0.0159629	0.0362359	0	0	0.303724	1.91543e-18
TCGA-S9-A7QW-01	0.720694	Training	Low	Cluster2	0	1.25479	54	female	III	astrocytoma	0.696415	0.104	-1458.92	-933.048	-2391.97	IDH1 mutant	1p19q non-codel	Methylated	-0.59644	5.75522	0.0153628	0.101251	0.00811448	0	0.354524	0
TCGA-S9-A7QX-01	0.708899	Internal Validation	Low	Cluster2	0	1.54521	36	female	III	astrocytoma	0.705663	0.112	-1063.36	140.267	-923.094	IDH1 mutant	1p19q non-codel	Methylated	-0.708507	5.70721	0.0100252	0	0	0	0.285312	4.66571e-18
TCGA-S9-A7QY-01	1.29053	Internal Validation	Low	Cluster2	0	2.36438	35	female	II	oligoastrocytoma	0.636576	0.093	-1337.03	-828.402	-2165.43	IDH1 mutant	1p19q codel	Methylated	-0.682424	5.84414	0.0180266	0.105787	0.0144467	0	0.594939	0
TCGA-S9-A7QZ-01	0.936366	Training	Low	Cluster2	0	2.26301	41	male	II	oligodendroglioma	0.644181	0.072	-1445.42	-1201.47	-2646.89	IDH1 mutant	1p19q codel	Methylated	-0.799786	5.75454	0.0219512	0.0618066	0.0375265	0	0.397768	5.99199e-18
TCGA-S9-A7R1-01	2.04853	Internal Validation	Low	Cluster2	1	14.1534	35	male	II	oligodendroglioma	0.672897	0.088	-1283.98	-992.006	-2275.99	IDH1 mutant	1p19q codel	Methylated	-0.669329	5.68432	0.0218854	0.103249	0.0124694	0	0.331958	8.35643e-19
TCGA-S9-A7R2-01	2.39341	Training	High	Cluster1	1	0.865753	69	male	III	astrocytoma	0.386994	0.256	-272.415	922.551	650.136	IDH1 wildtype	1p19q non-codel	Unmethylated	-0.558369	5.98064	0.0172268	0.0195399	0.074853	0	2.09842	0
TCGA-S9-A7R3-01	1.3845	Training	Low	Cluster2	0	8.25479	28	female	II	astrocytoma	0.494641	0.116	-747.664	131.753	-615.91	IDH1 mutant	1p19q non-codel	Methylated	-0.710593	5.95495	0.0201021	0.163678	0.00133373	0	0.893574	0
TCGA-S9-A7R4-01	1.5133	Training	Low	Cluster2	0	2.50411	46	male	III	astrocytoma	0.468829	0.063	-84.5775	279.846	195.268	IDH1 mutant	1p19q non-codel	Methylated	-0.729878	5.62307	0.0181648	0.151602	0	0	0.691309	0
TCGA-S9-A7R7-01	2.75916	Training	High	Cluster1	0	8.21918	27	male	II	astrocytoma	0.212667	0.122	300.394	1075.61	1376	IDH1 mutant	1p19q non-codel	Methylated	-0.481653	5.8337	0.019753	0.121264	0.0351619	0	0.341011	0
TCGA-S9-A7R8-01	0.0145846	Internal Validation	Low	Cluster2	1	2.63288	44	female	III	astrocytoma	0.590764	0.107	-813.571	231.665	-581.906	IDH1 mutant	1p19q non-codel	Methylated	-0.721213	5.76352	0.0184521	0.0170926	0.016801	0	0.116238	0
TCGA-S9-A89V-01	1.93795	Internal Validation	Low	Cluster2	0	1.5589	70	male	III	astrocytoma	0.360692	0.415	-710.518	-9.40899	-719.927	IDH1 wildtype	1p19q non-codel	Methylated	-0.729105	5.77744	0.0285376	0.181785	0.0290853	0	0.649887	5.6532e-19
TCGA-S9-A89Z-01	3.09931	Training	High	Cluster1	0	1.70685	40	male	III	astrocytoma	0.443109	0.138	-287.156	782.673	495.517	IDH1 mutant	1p19q non-codel	Methylated	-0.645483	5.70863	0.0215044	0.0956782	0.0290912	0	0.307136	0
TCGA-TM-A7C3-01	1.83834	Training	Low	Cluster1	1	4.56438	43	female	III	astrocytoma	0.446533	0.229	-1026.45	-658.332	-1684.78	IDH1 wildtype	1p19q non-codel	Methylated	-0.626201	5.7737	0.0159227	0.220038	0.0134984	0	0.746753	0
TCGA-TM-A7C4-01	1.55012	Training	Low	Cluster2	0	4.0274	39	female	II	astrocytoma	0.699407	0.12	-1253.48	-1053.87	-2307.35	IDH1 mutant	1p19q non-codel	Methylated	-0.759699	5.78286	0.0345418	0.171552	0	0	0.378466	2.88437e-18
TCGA-TM-A7C5-01	1.4226	Training	Low	Cluster2	0	4.10959	30	male	II	oligoastrocytoma	0.875462	0.062	-1318.41	-827.175	-2145.58	IDH1 mutant	1p19q codel	Methylated	-0.705974	5.3914	0.0174808	0.0621862	0.028914	0	0.40593	0
TCGA-TM-A7CA-01	0.849042	Training	Low	Cluster2	0	2.89863	44	male	II	astrocytoma	0.665707	0.144	-1284.07	-681.663	-1965.73	IDH1 mutant	1p19q non-codel	Methylated	-0.741273	5.76422	0.0199473	0.0999062	0.00713384	0	0.321402	1.34801e-19
TCGA-TM-A7CF-01	0.995336	Internal Validation	Low	Cluster2	0	5.44932	41	female	II	astrocytoma	0.673796	0.117	-1366.78	-1001.39	-2368.16	IDH1 mutant	1p19q non-codel	Methylated	-0.699094	5.8953	0.0268369	0.0730831	0.0511036	0	0.426937	0
TCGA-TM-A84B-01	2.36574	Internal Validation	High	Cluster1	1	2.07671	40	male	III	astrocytoma	0.619854	0.39	-859.221	-773.184	-1632.4	IDH1 wildtype	1p19q non-codel	Unmethylated	-0.606984	5.66256	0.0206788	0.250036	0.0564245	0	0.774305	1.13214e-18
TCGA-TM-A84C-01	3.02425	Internal Validation	High	Cluster1	1	1.34795	32	male	II	astrocytoma	0.255997	0.211	-335.279	361.117	25.838	IDH1 wildtype	1p19q non-codel	Unmethylated	-0.580245	5.65477	0.0240197	0.449985	0	0	0.0721582	0
TCGA-TM-A84F-01	2.55215	Internal Validation	High	Cluster1	0	4.92055	48	male	III	astrocytoma	0.551783	0.182	-242.416	1375.4	1132.98	IDH1 mutant	1p19q non-codel	Methylated	-0.715421	5.81807	0.00748526	0	0.0434608	0	3.45051	1.93086e-18
TCGA-TM-A84G-01	1.85244	Training	Low	Cluster2	0	3.3863	54	female	III	oligodendroglioma	0.738711	0.127	-1591.85	-1200.94	-2792.79	IDH1 mutant	1p19q codel	Methylated	-0.754668	5.57282	0.0229898	0.0923316	0.0557907	0	0.30087	0
TCGA-TM-A84H-01	1.06815	Training	Low	Cluster2	0	2.53699	44	female	III	oligoastrocytoma	0.490701	0.087	-1380.06	-627.025	-2007.08	IDH1 mutant	1p19q non-codel	Methylated	-0.690335	5.70962	0.0177783	0.104479	0	0	0.19204	0
TCGA-TM-A84I-01	1.46869	Internal Validation	Low	Cluster2	0	2.33973	30	male	III	astrocytoma	0.787513	0.307	-1148.02	-292.859	-1440.88	IDH1 mutant	1p19q non-codel	Methylated	-0.532818	5.46202	0.0136884	0.107351	0.0741638	0	0.167936	0
TCGA-TM-A84J-01	2.39242	Training	High	Cluster2	0	2.0137	63	male	III	oligodendroglioma	0.782826	0.441	-928.021	-875.261	-1803.28	IDH1 wildtype	1p19q non-codel	Unmethylated	-0.605914	5.29008	0.019595	0.281996	0.0258149	0	0.145549	1.32981e-18
TCGA-TM-A84L-01	1.18257	Internal Validation	Low	Cluster2	1	3.40274	31	male	II	oligoastrocytoma	0.409069	0.109	-536.266	331.26	-205.005	IDH1 mutant	1p19q non-codel	Methylated	-0.672533	5.93936	0.00715965	0.118955	0	0	0.904533	0
TCGA-TM-A84M-01	1.65392	Internal Validation	Low	Cluster2	0	2.06575	40	male	III	oligodendroglioma	0.786582	0.174	-1602.89	-1044.79	-2647.68	IDH1 mutant	1p19q codel	Methylated	-0.695608	5.38353	0.028415	0.0795929	0.0131177	0	0.249063	3.55203e-20
TCGA-TM-A84O-01	1.34885	Internal Validation	Low	Cluster2	1	2.76986	61	female	III	oligodendroglioma	0.572914	0.081	-943.308	-322.601	-1265.91	IDH1 mutant	1p19q codel	Methylated	-0.592064	5.74714	0.0173816	0.21709	0.0243043	0	0.983933	2.06573e-18
TCGA-TM-A84Q-01	1.80355	Internal Validation	Low	Cluster1	0	2.11507	31	male	II	astrocytoma	0.529865	0.083	-602.354	490.578	-111.776	IDH1 mutant	1p19q non-codel	Methylated	-0.693464	5.66779	0.0126756	0.103317	0.00114929	0	0.122346	0
TCGA-TM-A84R-01	1.75253	Training	Low	Cluster2	0	1.55068	46	male	II	oligodendroglioma	0.73255	0.146	-1205.45	-1216.44	-2421.9	IDH1 mutant	1p19q codel	Methylated	-0.752757	5.88435	0.0599736	0.18548	0	0	0.474454	0
TCGA-TM-A84S-01	1.98415	Training	Low	Cluster2	0	1.24384	36	male	III	oligodendroglioma	0.643416	0.128	-965.175	-246.368	-1211.54	IDH1 mutant	1p19q codel	Methylated	-0.63931	5.80099	0.0103755	0.158731	0.00958632	0	0.530723	0
TCGA-TM-A84T-01	0.742331	Training	Low	Cluster2	0	1.98356	19	male	II	oligoastrocytoma	0.599935	0.099	-959.015	-111.094	-1070.11	IDH1 mutant	1p19q non-codel	Methylated	-0.657145	5.67363	0.0146787	0.0443368	0	0	0.309229	0
TCGA-TQ-A7RF-01	1.26685	Internal Validation	Low	Cluster2	0	1.78082	27	female	III	NA	0.56193	0.12	-1147.13	-162.636	-1309.76	IDH1 mutant	1p19q non-codel	Unmethylated	-0.693515	5.82195	0.00859754	0.129569	0.0137183	0	0.227284	0
TCGA-TQ-A7RG-01	1.97676	Internal Validation	Low	Cluster2	0	1.6411	36	male	II	NA	0.608012	0.11	-971.135	-261.216	-1232.35	IDH1 mutant	1p19q codel	Methylated	-0.718641	5.6888	0.0151586	0.137055	0.0121585	0	0.66077	1.28021e-18
TCGA-TQ-A7RH-01	0.79804	Internal Validation	Low	Cluster2	0	1.33151	39	male	II	NA	0.508956	0.124	-673.597	334.983	-338.614	IDH1 mutant	1p19q non-codel	Methylated	-0.576902	5.74324	0.0148581	0.0645082	0.0181704	0	0.528258	0
TCGA-TQ-A7RI-01	1.45115	Internal Validation	Low	Cluster2	0	0.169863	37	female	II	NA	0.550965	NA	-1188.13	-386.749	-1574.87	IDH1 mutant	1p19q codel	Methylated	-0.628837	5.75175	0.0183962	0.0277803	0.0500325	0	0.367657	7.66777e-18
TCGA-TQ-A7RJ-01	1.30215	Internal Validation	Low	Cluster2	0	3.36712	25	female	II	NA	0.543062	0.178	-917.624	113.612	-804.012	IDH1 mutant	1p19q non-codel	Methylated	-0.701533	5.85712	0.0157985	0	0	0	0.399036	3.20326e-19
TCGA-TQ-A7RK-01	0.698598	Internal Validation	Low	Cluster2	0	3.67397	29	male	II	NA	0.667673	0.077	-1307.3	-637.592	-1944.89	IDH1 mutant	1p19q non-codel	Methylated	-0.66508	5.68254	0.0115726	0.0902438	0	0	0.439528	0
TCGA-TQ-A7RM-01	0.944184	Internal Validation	Low	Cluster2	0	3.05753	41	female	III	NA	0.873344	0.28	-1360.5	-1194.39	-2554.89	IDH1 mutant	1p19q non-codel	Methylated	-0.67669	5.332	0.0158074	0.166583	0.0341418	0	0.0244243	0
TCGA-TQ-A7RN-01	1.50231	Internal Validation	Low	Cluster2	0	2.81096	32	male	II	NA	0.640085	0.102	-1344.88	-801.157	-2146.03	IDH1 mutant	1p19q codel	Methylated	-0.74432	5.67394	0.0242755	0.0853158	0	0	0.145582	1.12947e-18
TCGA-TQ-A7RO-01	1.89455	Internal Validation	Low	Cluster2	0	2.6	29	male	II	NA	0.582202	0.092	-1323.67	-738.144	-2061.81	IDH1 mutant	1p19q codel	Methylated	-0.716171	5.62456	0.0276128	0.0841386	0.0319731	0	0.478034	0
TCGA-TQ-A7RP-01	2.09078	Internal Validation	High	Cluster2	0	2.50411	66	male	II	NA	0.39131	0.187	-488.828	-127.173	-616.001	IDH1 wildtype	1p19q non-codel	Methylated	-0.575502	6.19072	0.0246503	0.195144	0.0343142	0	0.857474	0
TCGA-TQ-A7RQ-01	0.937893	Internal Validation	Low	Cluster2	0	2.17808	38	female	II	NA	0.706063	0.132	-1531.87	-1342.19	-2874.06	IDH1 mutant	1p19q codel	Methylated	-0.617446	5.6018	0.0237559	0.0419481	0.0217356	0	0.242152	0
TCGA-TQ-A7RR-01	1.20369	Internal Validation	Low	Cluster2	0	2.15616	38	male	II	NA	0.514796	0.169	-798.075	40.7644	-757.311	IDH1 mutant	1p19q non-codel	Unmethylated	-0.65238	5.91723	0.01371	0.031733	0.0168823	0	0.531381	0
TCGA-TQ-A7RV-01	0.975663	Internal Validation	Low	Cluster2	0	5.11781	27	male	II	NA	0.603267	0.086	-1234.9	-630.46	-1865.36	IDH1 mutant	1p19q non-codel	Methylated	-0.818377	5.84275	0.0195298	0.0690431	0.0108815	0	0.277663	0
TCGA-TQ-A7RW-01	0.983437	Internal Validation	Low	Cluster2	1	2.24932	32	male	II	NA	0.521676	0.18	-504.291	668.37	164.079	IDH1 mutant	1p19q non-codel	Methylated	-0.585461	5.51936	0.0200318	0.0172002	0	0	0.895016	1.99034e-18
TCGA-TQ-A8XE-01	0.479202	Internal Validation	Low	Cluster2	1	2.6137	42	female	II	NA	0.618951	0.181	-1204.28	-317.931	-1522.21	IDH1 mutant	1p19q non-codel	Methylated	-0.718924	5.82496	0.00823496	0.0316508	0	0	0.136442	0
TCGA-VM-A8C8-01	1.61778	Training	Low	Cluster2	0	3.8274	50	female	II	oligodendroglioma	0.54946	0.129	-847.36	42.6709	-804.689	IDH1 mutant	1p19q non-codel	Unmethylated	-0.697367	5.99248	0.0159125	0.0408801	0	0	0.18012	0
TCGA-VM-A8C9-01	2.44933	Internal Validation	High	Cluster1	0	3.6	37	female	II	astrocytoma	0.544021	0.236	-68.0057	1287.82	1219.82	IDH1 wildtype	1p19q non-codel	Unmethylated	-0.797206	6.16465	0.00572847	0	0.0984858	0	2.16265	0
TCGA-VM-A8CA-01	2.85301	Internal Validation	High	Cluster2	0	1.12603	54	male	II	oligodendroglioma	0.567357	0.154	-549.969	104.617	-445.352	IDH1 mutant	1p19q non-codel	Methylated	-0.636208	5.92614	0.0128475	0.188259	0.0294333	0	0.764957	2.60396e-18
TCGA-VM-A8CB-01	1.2388	Internal Validation	Low	Cluster2	0	0.00821918	33	male	III	oligodendroglioma	0.819465	0.13	-1558.94	-852.323	-2411.27	IDH1 mutant	1p19q codel	Methylated	-0.751619	5.63518	0.0167057	0.00585916	0.0743724	0	0.197003	2.25505e-18
TCGA-VM-A8CD-01	2.60177	Training	High	Cluster1	1	0.657534	58	male	III	astrocytoma	0.613677	0.248	-482.687	413.611	-69.076	IDH1 wildtype	1p19q non-codel	Unmethylated	-0.735045	6.08729	0.00496163	0	0	0	0.305325	0
TCGA-VM-A8CE-01	1.58082	Training	Low	Cluster2	0	3.26301	25	male	II	oligodendroglioma	0.500042	0.106	-940.231	-557.284	-1497.52	IDH1 mutant	1p19q codel	Methylated	-0.721859	5.78791	0.0110634	0.198709	0	0	0.235266	1.67677e-17
TCGA-VM-A8CF-01	1.22898	Internal Validation	Low	Cluster1	0	1.66849	44	female	III	NA	0.497401	0.157	-467.273	953.246	485.973	IDH1 mutant	1p19q non-codel	Methylated	-0.618781	6.16751	0.0023209	0	0.0137285	0	0.41762	1.91409e-18
TCGA-VM-A8CH-01	2.1947	Internal Validation	High	Cluster2	0	1.95616	24	female	II	astrocytoma	0.479392	0.096	-754.616	255.748	-498.869	IDH1 mutant	1p19q non-codel	Unmethylated	-0.676468	5.68456	0.0188135	0.0716138	0.00706247	0	0.332211	3.15109e-18
TCGA-VV-A829-01	1.9162	Training	Low	Cluster2	0	3.08767	44	male	III	oligoastrocytoma	0.624314	0.172	-907.076	-25.3836	-932.46	IDH1 mutant	1p19q codel	Methylated	-0.735305	5.49452	0.017736	0.115446	0	0	0.0591813	0
TCGA-VV-A86M-01	1.08326	Internal Validation	Low	Cluster2	0	1.33425	36	female	III	astrocytoma	0.699807	0.081	-920.423	260.093	-660.33	IDH1 mutant	1p19q non-codel	Methylated	-0.611066	5.53756	0.0156968	0.0499518	0.0148539	0	0.18049	0.0113688
TCGA-VW-A7QS-01	2.01595	Training	Low	Cluster2	0	1.93425	35	female	III	oligodendroglioma	0.65557	0.166	-1301.19	-827.428	-2128.62	IDH1 mutant	1p19q codel	Methylated	-0.678842	5.44598	0.0185753	0.0912695	0.00485148	0	0	0
TCGA-VW-A8FI-01	1.60394	Internal Validation	Low	Cluster2	1	0.671233	66	male	III	astrocytoma	0.53922	0.353	-819.017	360.718	-458.299	IDH1 wildtype	1p19q non-codel	Unmethylated	-0.600254	5.83474	0.00462783	0.028683	0.0275919	0	0.512452	0
TCGA-W9-A837-01	1.5245	Training	Low	Cluster2	0	4.25479	47	male	II	oligodendroglioma	0.704551	0.156	-1331.58	-1039.56	-2371.13	IDH1 mutant	1p19q codel	Methylated	-0.739355	5.74154	0.0259766	0.123291	0.0140757	0	0.305434	2.86791e-18
TCGA-WH-A86K-01	1.19139	Training	Low	Cluster2	0	1.10959	65	male	II	astrocytoma	0.56803	0.203	-931.938	-128.302	-1060.24	IDH1 mutant	1p19q non-codel	Methylated	-0.592024	5.96123	0.00892857	0.0758605	0.0150794	0	0.522683	0
TCGA-WY-A858-01	1.11978	Internal Validation	Low	Cluster2	0	3.66301	32	female	III	astrocytoma	0.472377	0.152	-108.24	959.156	850.916	IDH1 mutant	1p19q non-codel	Methylated	-0.537778	5.87422	0.00349074	0.0459948	0	0	0.384869	0
TCGA-WY-A859-01	1.08654	Internal Validation	Low	Cluster2	0	3.32329	34	female	II	NA	0.763825	0.133	-1354.41	-1186.67	-2541.08	IDH1 mutant	1p19q non-codel	Methylated	-0.842296	5.90098	0.0313446	0.136467	0.0593945	0	0.257724	7.17531e-18
TCGA-WY-A85A-01	1.41475	Internal Validation	Low	Cluster2	0	3.61644	20	male	II	NA	0.60065	0.114	-1155.93	-250.074	-1406.01	IDH1 mutant	1p19q non-codel	Methylated	-0.794435	5.8381	0.013499	0.110664	0	0	0.447825	1.73579e-18
TCGA-WY-A85B-01	0.854657	Internal Validation	Low	Cluster2	0	3.81644	24	male	II	NA	0.688759	0.061	-684.361	506.632	-177.729	IDH1 mutant	1p19q non-codel	Methylated	-0.620489	5.67172	0.0147085	0.0702578	0.0217198	0	0.568233	1.94718e-18
TCGA-WY-A85C-01	1.46616	Internal Validation	Low	Cluster2	0	3.90685	36	male	II	NA	0.515341	0.112	-1021.8	-173.421	-1195.22	IDH1 mutant	1p19q non-codel	Methylated	-0.740112	5.7504	0.00974714	0.0687011	0.0141147	0	0.239172	0
TCGA-WY-A85D-01	0.812538	Internal Validation	Low	Cluster2	0	3.14247	60	male	II	NA	0.593704	0.143	-976.821	36.6852	-940.136	IDH1 mutant	1p19q non-codel	Unmethylated	-0.644034	5.96988	0.00628421	0.0319004	0	0	0.375515	3.5364e-18
TCGA-WY-A85E-01	1.09427	Internal Validation	Low	Cluster2	0	1.73425	48	female	II	NA	0.687128	0.086	-1387.7	-858.052	-2245.75	IDH1 mutant	1p19q non-codel	Methylated	-0.639939	5.75942	0.0171096	0.131831	0	0	0.138548	0
